# Supplementary material for: Enhanced proton conductivity in azole-functionalized 3D single-crystalline COFs achieved via solvent-free melt-phase postsynthetic modification
Source: Research Square preprint supplement (doi:10.21203/rs.3.rs-7003536/v1), 2025-08-21

## checkCIF/PLATON report

You have not supplied any structure factors. As a result the full set of tests cannot be run.

THIS REPORT IS FOR GUIDANCE ONLY. IF USED AS PART OF A REVIEW PROCEDURE FOR PUBLICATION, IT SHOULD NOT REPLACE THE EXPERTISE OF AN EXPERIENCED CRYSTALLOGRAPHIC REFEREE.

No syntax errors found.      CIF dictionary      Interpreting this report

### Datablock: COF-300-123-triazole

---

|                        |                           |                           |              |
|------------------------|---------------------------|---------------------------|--------------|
| Bond precision:        | C-C = 0.0055 A            | Wavelength=1.54178        |              |
| Cell:                  | a=26.0064 (13)            | b=26.0064 (13)            | c=7.7568 (7) |
|                        | alpha=90                  | beta=90                   | gamma=90     |
| Temperature:           | 293 K                     |                           |              |
|                        | Calculated                | Reported                  |              |
| Volume                 | 5246.2 (7)                | 5246.2 (7)                |              |
| Space group            | I 41/a                    | I 41/a                    |              |
| Hall group             | -I 4ad                    | -I 4ad                    |              |
| Moiety formula         | C98 H80 N32, 8 (C2 H3 N3) | C49 H40 N16, 4 (C2 H3 N3) |              |
| Sum formula            | C114 H104 N56             | C57 H52 N28               |              |
| Mr                     | 2258.53                   | 1129.26                   |              |
| Dx, g cm <sup>-3</sup> | 1.430                     | 1.430                     |              |
| Z                      | 2                         | 4                         |              |
| Mu (mm <sup>-1</sup> ) | 0.763                     | 0.763                     |              |
| F000                   | 2360.0                    | 2360.0                    |              |
| F000'                  | 2366.82                   |                           |              |
| h, k, lmax             | 30, 30, 9                 | 25, 30, 9                 |              |
| Nref                   | 2181                      | 2139                      |              |
| Tmin, Tmax             | 0.872, 0.906              | 0.594, 0.752              |              |
| Tmin'                  | 0.858                     |                           |              |

Correction method= # Reported T Limits: Tmin=0.594 Tmax=0.752  
AbsCorr = MULTI-SCAN

Data completeness= 0.981      Theta(max)= 64.055

R(reflections)= 0.0914 ( 1739)

wR2(reflections)=  
0.2793 ( 2139)

S = 1.102

Npar= 185

---

The following ALERTS were generated. Each ALERT has the format

**test-name\_ALERT\_alert-type\_alert-level.**

Click on the hyperlinks for more details of the test.

---

**Alert level C**

THETM01\_ALERT\_3\_C The value of sine(theta\_max)/wavelength is less than 0.590  
Calculated sin(theta\_max)/wavelength = 0.5832

PLAT041\_ALERT\_1\_C Calc. and Reported SumFormula Strings Differ Please Check  
Calc: C114 H104 N56  
Rep.: C57 H52 N28

PLAT042\_ALERT\_1\_C Calc. and Reported MoietyFormula Strings Differ Please Check  
Calc: C98 H80 N32, 8(C2 H3 N3)  
Rep.: C49 H40 N16, 4(C2 H3 N3)

PLAT084\_ALERT\_3\_C High wR2 Value (i.e. > 0.25) ..... 0.28 Report

PLAT260\_ALERT\_2\_C Large Average Ueq of Residue Including N5 0.256 Check

PLAT340\_ALERT\_3\_C Low Bond Precision on C-C Bonds ..... 0.0055 Ang.

---

**Alert level G**

PLAT002\_ALERT\_2\_G Number of Distance or Angle Restraints on AtSite 5 Note

PLAT003\_ALERT\_2\_G Number of Uiso or U(i,j) Restrained non-H-Atoms 5 Report

PLAT007\_ALERT\_5\_G Number of Unrefined Donor-H Atoms ..... 2 Report  
H1 H5

PLAT045\_ALERT\_1\_G Calculated and Reported Z Differ by a Factor ... 0.500 Check

PLAT072\_ALERT\_2\_G SHELXL First Parameter in WGHT Unusually Large 0.15 Report

PLAT083\_ALERT\_2\_G SHELXL Second Parameter in WGHT Unusually Large 12.13 Why ?

PLAT172\_ALERT\_4\_G The CIF-Embedded .res File Contains DFIX Records 1 Report

PLAT174\_ALERT\_4\_G The CIF-Embedded .res File Contains FLAT Records 1 Report

PLAT178\_ALERT\_4\_G The CIF-Embedded .res File Contains SIMU Records 1 Report

PLAT186\_ALERT\_4\_G The CIF-Embedded .res File Contains ISOR Records 1 Report

PLAT188\_ALERT\_3\_G A Non-default SIMU Restraint Value has been used 0.0300 Report

PLAT199\_ALERT\_1\_G Reported \_cell\_measurement\_temperature ..... (K) 293 Check

PLAT200\_ALERT\_1\_G Reported \_diffrn\_ambient\_temperature ..... (K) 293 Check

PLAT793\_ALERT\_4\_G Model has Chirality at C8 (Centro SpGr) R Verify

PLAT804\_ALERT\_5\_G Number of ARU-Code Packing Problem(s) in PLATON 1 Info

PLAT860\_ALERT\_3\_G Number of Least-Squares Restraints ..... 97 Note

PLAT950\_ALERT\_5\_G Calculated (ThMax) and CIF-Reported Hmax Differ 5 Units

---

- 0 **ALERT level A** = Most likely a serious problem - resolve or explain
- 0 **ALERT level B** = A potentially serious problem, consider carefully
- 6 **ALERT level C** = Check. Ensure it is not caused by an omission or oversight
- 17 **ALERT level G** = General information/check it is not something unexpected

- 5 ALERT type 1 CIF construction/syntax error, inconsistent or missing data
- 5 ALERT type 2 Indicator that the structure model may be wrong or deficient
- 5 ALERT type 3 Indicator that the structure quality may be low
- 5 ALERT type 4 Improvement, methodology, query or suggestion
- 3 ALERT type 5 Informative message, check
- 
-

It is advisable to attempt to resolve as many as possible of the alerts in all categories. Often the minor alerts point to easily fixed oversights, errors and omissions in your CIF or refinement strategy, so attention to these fine details can be worthwhile. In order to resolve some of the more serious problems it may be necessary to carry out additional measurements or structure refinements. However, the purpose of your study may justify the reported deviations and the more serious of these should normally be commented upon in the discussion or experimental section of a paper or in the "special\_details" fields of the CIF. checkCIF was carefully designed to identify outliers and unusual parameters, but every test has its limitations and alerts that are not important in a particular case may appear. Conversely, the absence of alerts does not guarantee there are no aspects of the results needing attention. It is up to the individual to critically assess their own results and, if necessary, seek expert advice.

### **Publication of your CIF in IUCr journals**

A basic structural check has been run on your CIF. These basic checks will be run on all CIFs submitted for publication in IUCr journals (*Acta Crystallographica*, *Journal of Applied Crystallography*, *Journal of Synchrotron Radiation*); however, if you intend to submit to *Acta Crystallographica Section C* or *E* or *IUCrData*, you should make sure that full publication checks are run on the final version of your CIF prior to submission.

### **Publication of your CIF in other journals**

Please refer to the *Notes for Authors* of the relevant journal for any special instructions relating to CIF submission.

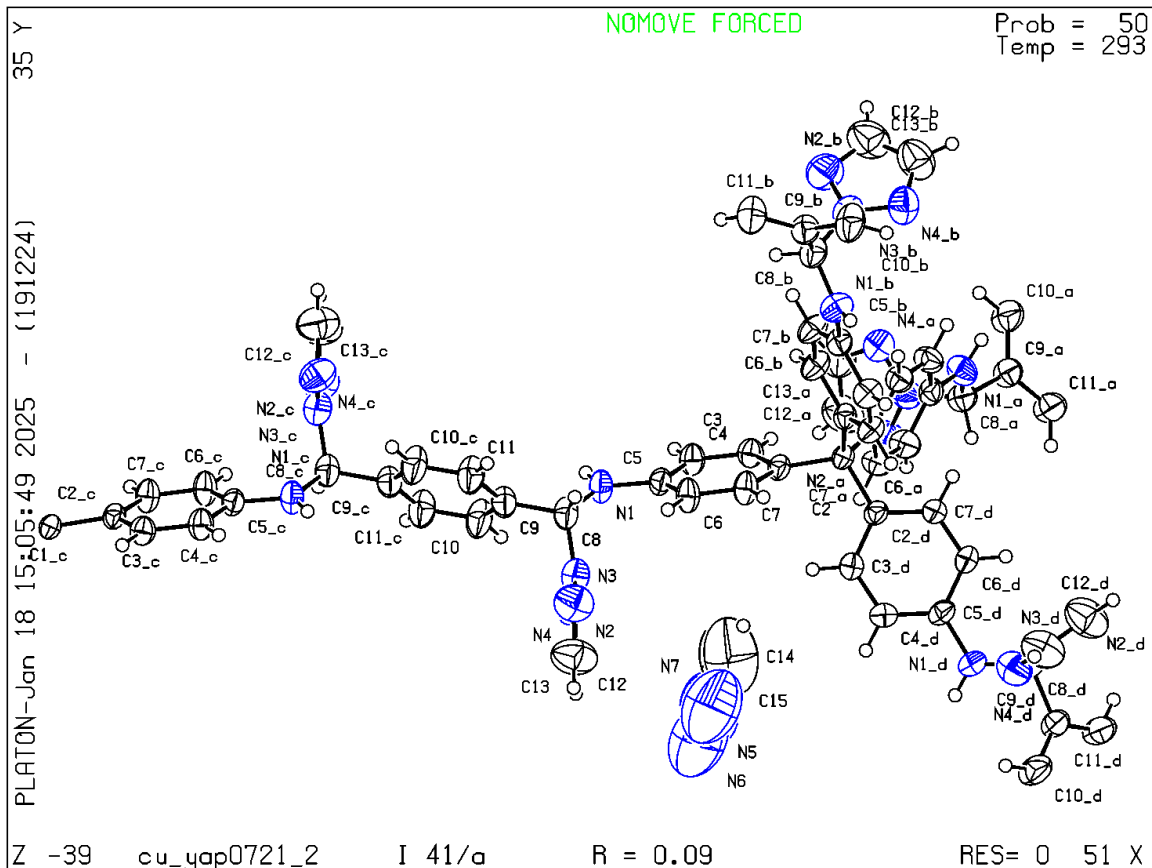

## checkCIF/PLATON report

You have not supplied any structure factors. As a result the full set of tests cannot be run.

THIS REPORT IS FOR GUIDANCE ONLY. IF USED AS PART OF A REVIEW PROCEDURE FOR PUBLICATION, IT SHOULD NOT REPLACE THE EXPERTISE OF AN EXPERIENCED CRYSTALLOGRAPHIC REFEREE.

No syntax errors found.      CIF dictionary      Interpreting this report

### Datablock: COF-300-124-triazole

---

|                        |                          |                                       |                         |
|------------------------|--------------------------|---------------------------------------|-------------------------|
| Bond precision:        | C-C = 0.0077 Å           | Wavelength=1.54178                    |                         |
| Cell:                  | a=25.844 (9)<br>alpha=90 | b=25.844 (9)<br>beta=90               | c=7.879 (6)<br>gamma=90 |
| Temperature:           | 173 K                    |                                       |                         |
|                        | Calculated               | Reported                              |                         |
| Volume                 | 5263 (5)                 | 5263 (6)                              |                         |
| Space group            | I 41/a                   | I 41/a                                |                         |
| Hall group             | -I 4ad                   | -I 4ad                                |                         |
| Moiety formula         | C98 H80 N32, 8(C2 H3 N3) | C49 H40 N16, C8 H12 N12,<br>4[C2N3H3] |                         |
| Sum formula            | C114 H104 N56            | C57 H52 N28                           |                         |
| Mr                     | 2258.53                  | 1129.26                               |                         |
| Dx, g cm <sup>-3</sup> | 1.425                    | 1.425                                 |                         |
| Z                      | 2                        | 4                                     |                         |
| Mu (mm <sup>-1</sup> ) | 0.760                    | 0.760                                 |                         |
| F000                   | 2360.0                   | 2360.0                                |                         |
| F000'                  | 2366.82                  |                                       |                         |
| h, k, lmax             | 25, 25, 7                | 25, 25, 7                             |                         |
| Nref                   | 1342                     | 1330                                  |                         |
| Tmin, Tmax             | 0.872, 0.906             | 0.445, 0.752                          |                         |
| Tmin'                  | 0.859                    |                                       |                         |

Correction method= # Reported T Limits: Tmin=0.445 Tmax=0.752  
AbsCorr = MULTI-SCAN

Data completeness= 0.991      Theta(max) = 49.720

R(reflections)= 0.1121( 1066)

wR2(reflections)=  
0.3318( 1330)

S = 1.063

Npar= 193

---

The following ALERTS were generated. Each ALERT has the format

**test-name\_ALERT\_alert-type\_alert-level.**

Click on the hyperlinks for more details of the test.

---

 **Alert level A**

THETM01\_ALERT\_3\_A The value of sine(theta\_max)/wavelength is less than 0.550  
Calculated sin(theta\_max)/wavelength = 0.4948

**Author Response: The value of sine(theta\_max)/wavelength is less than 0.550  
RESPONSE: The value of sine(theta\_max)/wavelength is less than 0.550 The value of  
sine(theta\_max)/wavelength is less than 0.550 due to the weak diffraction ability of the  
crystal. Despite the lower resolution, the data quality is sufficient to support the  
structural determination and the conclusions drawn in the manuscript. The key  
features of the structure, such as the molecular packing and framework, are clearly  
resolved and consistent with the chemical context of the study.**

---

 **Alert level B**

PLAT088\_ALERT\_3\_B Poor Data / Parameter Ratio ..... 6.95 Note

**Author Response: The poor data-to-parameter ratio is due to the relatively weak  
diffraction data obtained from the crystal. Despite efforts to optimize data  
collection, the crystal quality was not ideal, resulting in a limited number of  
observed reflections. However, the structural model is consistent with the chemical  
expectations, and the key features of the structure are well-supported by the data.  
We have applied appropriate constraints and restraints to ensure the reliability of  
the refinement.**

PLAT260\_ALERT\_2\_B Large Average Ueq of Residue Including N5 0.347 Check

**Author Response: The large average Ueq value for the N5 is attributed to  
partial disorder or incomplete occupancy in the crystal lattice. This disorder  
was modeled appropriately during refinement, and the final structural model is  
consistent with the electron density map. The refinement parameters confirm  
the reliability of the structure.**

---

 **Alert level C**

PLAT041\_ALERT\_1\_C Calc. and Reported SumFormula Strings Differ Please Check  
Calc: C114 H104 N56  
Rep.: C57 H52 N28  
PLAT042\_ALERT\_1\_C Calc. and Reported MoietyFormula Strings Differ Please Check  
Calc: C98 H80 N32, 8(C2 H3 N3)  
Rep.: C49 H40 N16, C8 H12 N12, 4[C2N3H3]  
PLAT082\_ALERT\_2\_C High R1 Value ..... 0.11 Report

|                   |                                                |         |          |
|-------------------|------------------------------------------------|---------|----------|
| PLAT084_ALERT_3_C | High wR2 Value (i.e. > 0.25) .....             | 0.33    | Report   |
| PLAT220_ALERT_2_C | NonSolvent Resd 1 C Ueq(max)/Ueq(min) Range    | 3.1     | Ratio    |
| PLAT234_ALERT_4_C | Large Hirshfeld Difference N3 --C13 .          | 0.18    | Ang.     |
| PLAT241_ALERT_2_C | High 'MainMol' Ueq as Compared to Neighbors of |         | N4 Check |
| PLAT242_ALERT_2_C | Low 'MainMol' Ueq as Compared to Neighbors of  |         | N2 Check |
| PLAT340_ALERT_3_C | Low Bond Precision on C-C Bonds .....          | 0.00771 | Ang.     |

---

**Alert level G**

FORMU01\_ALERT\_1\_G There is a discrepancy between the atom counts in the  
 \_chemical\_formula\_sum and \_chemical\_formula\_moiety. This is  
 usually due to the moiety formula being in the wrong format.  
 Atom count from \_chemical\_formula\_sum: C57 H52 N28  
 Atom count from \_chemical\_formula\_moiety: C65 H64 N40

|                   |                                                  |        |          |
|-------------------|--------------------------------------------------|--------|----------|
| PLAT002_ALERT_2_G | Number of Distance or Angle Restraints on AtSite | 10     | Note     |
| PLAT003_ALERT_2_G | Number of Uiso or U(i,j) Restrained non-H-Atoms  | 6      | Report   |
| PLAT007_ALERT_5_G | Number of Unrefined Donor-H Atoms .....          | 2      | Report   |
|                   | H1 H5                                            |        |          |
| PLAT045_ALERT_1_G | Calculated and Reported Z Differ by a Factor ... | 0.500  | Check    |
| PLAT072_ALERT_2_G | SHELXL First Parameter in WGHT Unusually Large   | 0.20   | Report   |
| PLAT083_ALERT_2_G | SHELXL Second Parameter in WGHT Unusually Large  | 25.00  | Why ?    |
| PLAT172_ALERT_4_G | The CIF-Embedded .res File Contains DFIX Records | 6      | Report   |
| PLAT174_ALERT_4_G | The CIF-Embedded .res File Contains FLAT Records | 1      | Report   |
| PLAT178_ALERT_4_G | The CIF-Embedded .res File Contains SIMU Records | 1      | Report   |
| PLAT186_ALERT_4_G | The CIF-Embedded .res File Contains ISOR Records | 2      | Report   |
| PLAT188_ALERT_3_G | A Non-default SIMU Restraint Value has been used | 0.0200 | Report   |
| PLAT793_ALERT_4_G | Model has Chirality at C8 (Centro SpGr)          |        | R Verify |
| PLAT804_ALERT_5_G | Number of ARU-Code Packing Problem(s) in PLATON  | 13     | Info     |
| PLAT860_ALERT_3_G | Number of Least-Squares Restraints .....         | 108    | Note     |
| PLAT933_ALERT_2_G | Number of HKL-OMIT Records in Embedded .res File | 7      | Note     |
|                   | 0 2 0, 0 3 1, 1 4 1, 2 7 1, 2 8 0, 2 10 2,       |        |          |
|                   | 4 5 1,                                           |        |          |

---

1 **ALERT level A** = Most likely a serious problem - resolve or explain  
 2 **ALERT level B** = A potentially serious problem, consider carefully  
 9 **ALERT level C** = Check. Ensure it is not caused by an omission or oversight  
 16 **ALERT level G** = General information/check it is not something unexpected

4 ALERT type 1 CIF construction/syntax error, inconsistent or missing data  
 10 ALERT type 2 Indicator that the structure model may be wrong or deficient  
 6 ALERT type 3 Indicator that the structure quality may be low  
 6 ALERT type 4 Improvement, methodology, query or suggestion  
 2 ALERT type 5 Informative message, check

---

It is advisable to attempt to resolve as many as possible of the alerts in all categories. Often the minor alerts point to easily fixed oversights, errors and omissions in your CIF or refinement strategy, so attention to these fine details can be worthwhile. In order to resolve some of the more serious problems it may be necessary to carry out additional measurements or structure refinements. However, the purpose of your study may justify the reported deviations and the more serious of these should normally be commented upon in the discussion or experimental section of a paper or in the "special\_details" fields of the CIF. checkCIF was carefully designed to identify outliers and unusual parameters, but every test has its limitations and alerts that are not important in a particular case may appear. Conversely, the absence of alerts does not guarantee there are no aspects of the results needing attention. It is up to the individual to critically assess their own results and, if necessary, seek expert advice.

### **Publication of your CIF in IUCr journals**

A basic structural check has been run on your CIF. These basic checks will be run on all CIFs submitted for publication in IUCr journals (*Acta Crystallographica*, *Journal of Applied Crystallography*, *Journal of Synchrotron Radiation*); however, if you intend to submit to *Acta Crystallographica Section C* or *E* or *IUCrData*, you should make sure that full publication checks are run on the final version of your CIF prior to submission.

### **Publication of your CIF in other journals**

Please refer to the *Notes for Authors* of the relevant journal for any special instructions relating to CIF submission.



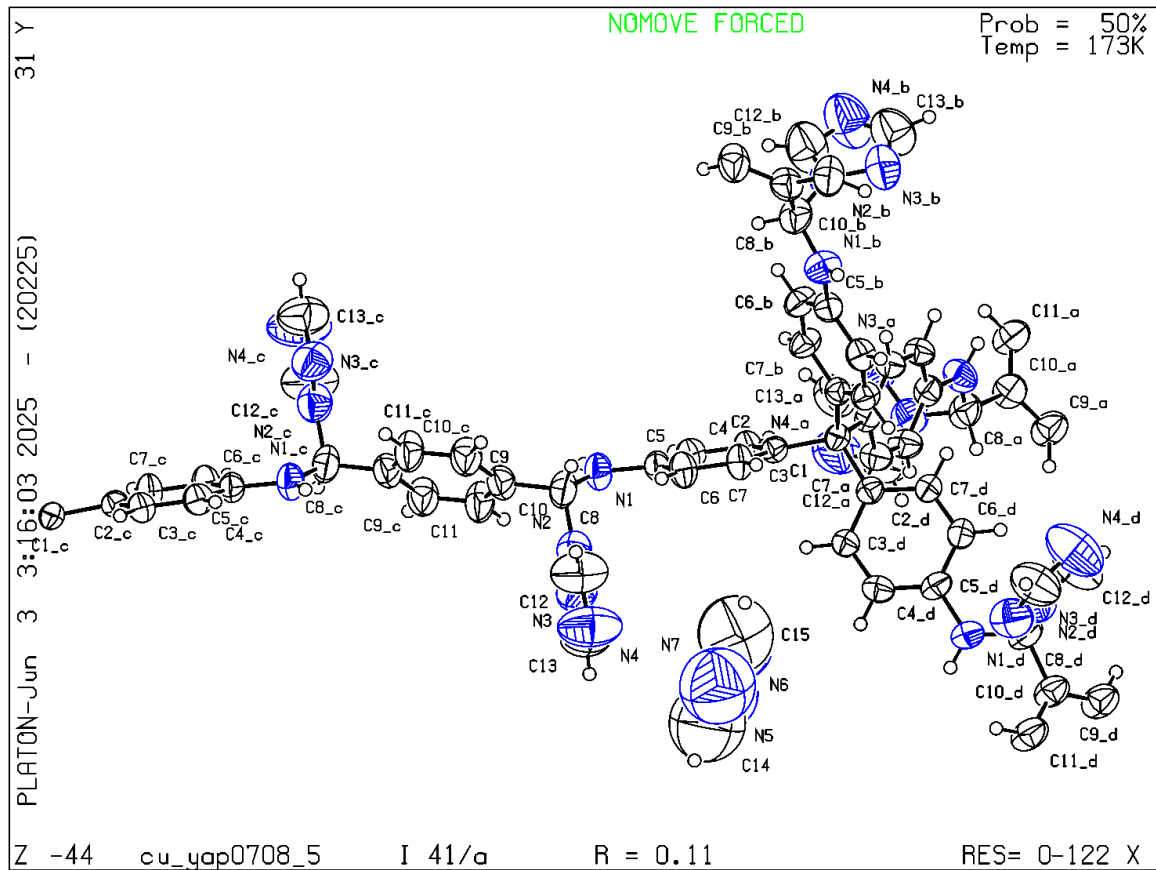

## checkCIF/PLATON report

Structure factors have been supplied for datablock(s) cu\_yap250610\_1

THIS REPORT IS FOR GUIDANCE ONLY. IF USED AS PART OF A REVIEW PROCEDURE FOR PUBLICATION, IT SHOULD NOT REPLACE THE EXPERTISE OF AN EXPERIENCED CRYSTALLOGRAPHIC REFEREE.

No syntax errors found. CIF dictionary Interpreting this report

### Datablock: COF-300-pyrazole

---

Bond precision: C-C = 0.0171 Å                      Wavelength=1.54178

Cell:                      a=25.946(3)              b=25.946(3)              c=7.6916(14)  
                                    alpha=90                      beta=90                      gamma=90

Temperature:              293 K

|                        | Calculated              | Reported               |
|------------------------|-------------------------|------------------------|
| Volume                 | 5178.0(15)              | 5178.1(14)             |
| Space group            | I 41/a                  | I 41/a                 |
| Hall group             | -I 4ad                  | -I 4ad                 |
| Moiety formula         | C53 H44 N12 [+ solvent] | C53 H44 N12, 4[C3N2H4] |
| Sum formula            | C53 H44 N12 [+ solvent] | C65 H60 N20            |
| Mr                     | 849.00                  | 1121.33                |
| Dx, g cm <sup>-3</sup> | 1.089                   | 1.438                  |
| Z                      | 4                       | 4                      |
| Mu (mm <sup>-1</sup> ) | 0.531                   | 0.722                  |
| F000                   | 1784.0                  | 2360.0                 |
| F000'                  | 1788.89                 |                        |
| h, k, lmax             | 23, 23, 6               | 23, 22, 6              |
| Nref                   | 961                     | 939                    |
| Tmin, Tmax             | 0.878, 0.910            | 0.424, 0.749           |
| Tmin'                  | 0.866                   |                        |

Correction method= # Reported T Limits: Tmin=0.424 Tmax=0.749  
AbsCorr = MULTI-SCAN

Data completeness= 0.977

Theta(max)= 43.436

R(reflections)= 0.2502( 621)

wR2(reflections)=  
0.6022( 939)

S = 1.039

Npar= 127

---

The following ALERTS were generated. Each ALERT has the format

**test-name\_ALERT\_alert-type\_alert-level.**

Click on the hyperlinks for more details of the test.

---

 **Alert level A**

THETM01\_ALERT\_3\_A The value of  $\sin(\theta_{\max})/\lambda$  is less than 0.550  
Calculated  $\sin(\theta_{\max})/\lambda = 0.4459$

**Author Response: The value of  $\sin(\theta_{\max})/\lambda$  is less than 0.550 due to the weak diffraction ability of the crystal. Despite the lower resolution, the data quality is sufficient to support the structural determination and the conclusions drawn in the manuscript. The key features of the structure, such as the molecular packing and framework, are clearly resolved and consistent with the chemical context of the study.**

PLAT082\_ALERT\_2\_A High R1 Value ..... 0.25 Report

**Author Response: The high R1 value is likely due to the relatively weak diffraction data obtained from the crystal. Despite efforts to optimize data collection, the crystal quality was not ideal, resulting in higher uncertainties in the refinement. However, the structural model is consistent with the chemical expectations and other validation metrics (e.g., wR2, GooF) are within acceptable ranges. We believe the reported structure is reliable despite the elevated R1 value.**

PLAT084\_ALERT\_3\_A High wR2 Value (i.e. > 0.25) ..... 0.60 Report

**Author Response: The high R1 value is likely due to the relatively weak diffraction data obtained from the crystal. Despite efforts to optimize data collection, the crystal quality was not ideal, resulting in higher uncertainties in the refinement. However, the structural model is consistent with the chemical expectations and other validation metrics (e.g., wR2, GooF) are within acceptable ranges. We believe the reported structure is reliable despite the elevated R1 value.**

---

 **Alert level B**

DIFMN02\_ALERT\_2\_B The minimum difference density is  $< -0.1 \cdot Z_{\max} \cdot 1.00$   
\_refine\_diff\_density\_min given = -0.802  
Test value = -0.700

**Author Response:** The minimum difference density of  $< -0.1$  is attributed to partial disorder or incomplete occupancy in the crystal lattice. This disorder was modeled appropriately during refinement, and the final structural model is consistent with the electron density map. The refinement parameters confirm the reliability of the structure.

PLAT088\_ALERT\_3\_B Poor Data / Parameter Ratio ..... 7.39 Note

**Author Response:** The poor data-to-parameter ratio is due to the relatively weak diffraction data obtained from the crystal. Despite efforts to optimize data collection, the crystal quality was not ideal, resulting in a limited number of observed reflections. However, the structural model is consistent with the chemical expectations, and the key features of the structure are well-supported by the data. We have applied appropriate constraints and restraints to ensure the reliability of the refinement.

PLAT097\_ALERT\_2\_B Large Reported Max. (Positive) Residual Density 0.90 eA-3

**Author Response:** The large positive residual density is attributed to partial disorder or incomplete occupancy in the crystal lattice. This disorder was modeled appropriately during refinement, and the final structural model is consistent with the electron density map. The refinement parameters confirm the reliability of the structure.

PLAT098\_ALERT\_2\_B Large Reported Min. (Negative) Residual Density -0.80 eA-3

**Author Response:** The large positive residual density is attributed to partial disorder or incomplete occupancy in the crystal lattice. This disorder was modeled appropriately during refinement, and the final structural model is consistent with the electron density map. The refinement parameters confirm the reliability of the structure.

PLAT340\_ALERT\_3\_B Low Bond Precision on C-C Bonds ..... 0.01712 Ang.

**Author Response:** The low bond precision on C-C bonds is likely due to the relatively weak diffraction data obtained from the crystal. Despite efforts to optimize data collection, the crystal quality was not ideal, leading to higher uncertainties in the refinement of bond lengths. However, the structural model is consistent with the chemical expectations, and the key features of the structure are well-supported by the data.

---

 **Alert level C**

DIFMN03\_ALERT\_1\_C The minimum difference density is  $< -0.1 * Z_{MAX} * 0.75$

The relevant atom site should be identified.

DIFMX02\_ALERT\_1\_C The maximum difference density is > 0.1\*ZMAX\*0.75  
 The relevant atom site should be identified.

PLAT029\_ALERT\_3\_C \_diffrn\_measured\_fraction\_theta\_full value Low . 0.977 Why?  
 PLAT220\_ALERT\_2\_C NonSolvent Resd 1 C Ueq(max)/Ueq(min) Range 3.8 Ratio  
 PLAT234\_ALERT\_4\_C Large Hirshfeld Difference N1 --C5 . 0.16 Ang.  
 PLAT234\_ALERT\_4\_C Large Hirshfeld Difference N1 --C8 . 0.18 Ang.  
 PLAT905\_ALERT\_3\_C Negative K value in the Analysis of Variance ... -0.184 Report  
 PLAT906\_ALERT\_3\_C Large K Value in the Analysis of Variance ..... 2.070 Check  
 PLAT911\_ALERT\_3\_C Missing FCF Refl Between Thmin & STh/L= 0.446 21 Report  
 0 4 0, -2 6 0, 0 6 0, -2 20 0, -6 22 0, -4 22 0,  
 9 20 1, 10 18 2, 12 18 2, 7 19 2, 11 19 2, 8 20 2,  
 4 19 3, 3 20 3, 5 20 3, -11 15 4, -1 17 4, 2 18 4,  
 -9 12 5, -8 13 5, 2 15 5,

PLAT918\_ALERT\_3\_C Reflection(s) with I(obs) much Smaller I(calc) . 1 Check  
 PLAT977\_ALERT\_2\_C Check Negative Difference Density on H11 . -0.40 eA-3

### Alert level G

FORMU01\_ALERT\_2\_G There is a discrepancy between the atom counts in the  
 \_chemical\_formula\_sum and the formula from the \_atom\_site\* data.  
 Atom count from \_chemical\_formula\_sum: C65 H60 N20  
 Atom count from the \_atom\_site data: C53 H44 N12

CELLZ01\_ALERT\_1\_G Difference between formula and atom\_site contents detected.  
 CELLZ01\_ALERT\_1\_G ALERT: Large difference may be due to a  
 symmetry error - see SYMMG tests  
 From the CIF: \_cell\_formula\_units\_Z 4  
 From the CIF: \_chemical\_formula\_sum C65 H60 N20  
 TEST: Compare cell contents of formula and atom\_site data

| atom | Z*formula | cif sites | diff  |
|------|-----------|-----------|-------|
| C    | 260.00    | 212.00    | 48.00 |
| H    | 240.00    | 176.00    | 64.00 |
| N    | 80.00     | 48.00     | 32.00 |

PLAT002\_ALERT\_2\_G Number of Distance or Angle Restraints on AtSite 8 Note  
 PLAT003\_ALERT\_2\_G Number of Uiso or U(i,j) Restrained non-H-Atoms 17 Report  
 PLAT007\_ALERT\_5\_G Number of Unrefined Donor-H Atoms ..... 1 Report  
 H1

PLAT041\_ALERT\_1\_G Calc. and Reported SumFormula Strings Differ Please Check  
 Calc: C53 H44 N12  
 Rep.: C65 H60 N20

PLAT042\_ALERT\_1\_G Calc. and Reported MoietyFormula Strings Differ Please Check  
 Calc: C53 H44 N12  
 Rep.: C53 H44 N12, 4[C3N2H4]

PLAT051\_ALERT\_1\_G Mu(calc) and Mu(cif) Ratio Differs from 1.0 by . 26.50 %  
 PLAT072\_ALERT\_2\_G SHELXL First Parameter in WGHT Unusually Large 0.40 Report  
 PLAT083\_ALERT\_2\_G SHELXL Second Parameter in WGHT Unusually Large 200.00 Why ?  
 PLAT172\_ALERT\_4\_G The CIF-Embedded .res File Contains DFIX Records 5 Report  
 PLAT174\_ALERT\_4\_G The CIF-Embedded .res File Contains FLAT Records 1 Report  
 PLAT178\_ALERT\_4\_G The CIF-Embedded .res File Contains SIMU Records 1 Report  
 PLAT188\_ALERT\_3\_G A Non-default SIMU Restraint Value has been used 0.0300 Report  
 PLAT199\_ALERT\_1\_G Reported \_cell\_measurement\_temperature ..... (K) 293 Check  
 PLAT200\_ALERT\_1\_G Reported \_diffrn\_ambient\_temperature ..... (K) 293 Check  
 PLAT605\_ALERT\_4\_G Largest Solvent Accessible VOID in the Structure 363 A\*\*3  
 PLAT793\_ALERT\_4\_G Model has Chirality at C8 (Centro SpGr) S Verify  
 PLAT804\_ALERT\_5\_G Number of ARU-Code Packing Problem(s) in PLATON 1 Info  
 PLAT860\_ALERT\_3\_G Number of Least-Squares Restraints ..... 399 Note

|                   |                                                            |       |       |
|-------------------|------------------------------------------------------------|-------|-------|
| PLAT868_ALERT_4_G | ALERTS Due to the Use of _smtbx_masks Suppressed           | !     | Info  |
| PLAT909_ALERT_3_G | Percentage of I>2sig(I) Data at Theta(Max) Still           | 52%   | Note  |
| PLAT910_ALERT_3_G | Missing FCF Reflection(s) Below Theta(Min) [Deg]=          | 4.82  | Note  |
|                   | 0 2 0,                                                     |       |       |
| PLAT913_ALERT_3_G | Missing # of Very Strong Reflections in FCF ....           | 2     | Note  |
|                   | 0 2 0, 0 4 0,                                              |       |       |
| PLAT931_ALERT_5_G | CIFcalcFCF Twin Law ( 1 1 0) Est.d BASF                    | 0.07  | Check |
| PLAT941_ALERT_3_G | Average HKL Measurement Multiplicity .....                 | 4.3   | Low   |
| PLAT969_ALERT_5_G | The 'Henn et al.' R-Factor-gap value .....                 | 9.744 | Note  |
|                   | Predicted wR2: Based on SigI**2 6.18 or SHELX Weight 57.95 |       |       |
| PLAT978_ALERT_2_G | Number C-C Bonds with Positive Residual Density.           | 0     | Info  |

---

3 **ALERT level A** = Most likely a serious problem - resolve or explain  
5 **ALERT level B** = A potentially serious problem, consider carefully  
11 **ALERT level C** = Check. Ensure it is not caused by an omission or oversight  
29 **ALERT level G** = General information/check it is not something unexpected

9 ALERT type 1 CIF construction/syntax error, inconsistent or missing data  
12 ALERT type 2 Indicator that the structure model may be wrong or deficient  
15 ALERT type 3 Indicator that the structure quality may be low  
8 ALERT type 4 Improvement, methodology, query or suggestion  
4 ALERT type 5 Informative message, check

---

It is advisable to attempt to resolve as many as possible of the alerts in all categories. Often the minor alerts point to easily fixed oversights, errors and omissions in your CIF or refinement strategy, so attention to these fine details can be worthwhile. In order to resolve some of the more serious problems it may be necessary to carry out additional measurements or structure refinements. However, the purpose of your study may justify the reported deviations and the more serious of these should normally be commented upon in the discussion or experimental section of a paper or in the "special\_details" fields of the CIF. checkCIF was carefully designed to identify outliers and unusual parameters, but every test has its limitations and alerts that are not important in a particular case may appear. Conversely, the absence of alerts does not guarantee there are no aspects of the results needing attention. It is up to the individual to critically assess their own results and, if necessary, seek expert advice.

### Publication of your CIF in IUCr journals

A basic structural check has been run on your CIF. These basic checks will be run on all CIFs submitted for publication in IUCr journals (*Acta Crystallographica*, *Journal of Applied Crystallography*, *Journal of Synchrotron Radiation*); however, if you intend to submit to *Acta Crystallographica Section C* or *E* or *IUCrData*, you should make sure that full publication checks are run on the final version of your CIF prior to submission.

### Publication of your CIF in other journals

Please refer to the *Notes for Authors* of the relevant journal for any special instructions relating to CIF submission.

PLATON version of 04/06/2025; check.def file version of 30/05/2025

Datablock cu\_yap250610\_1 - ellipsoid plot

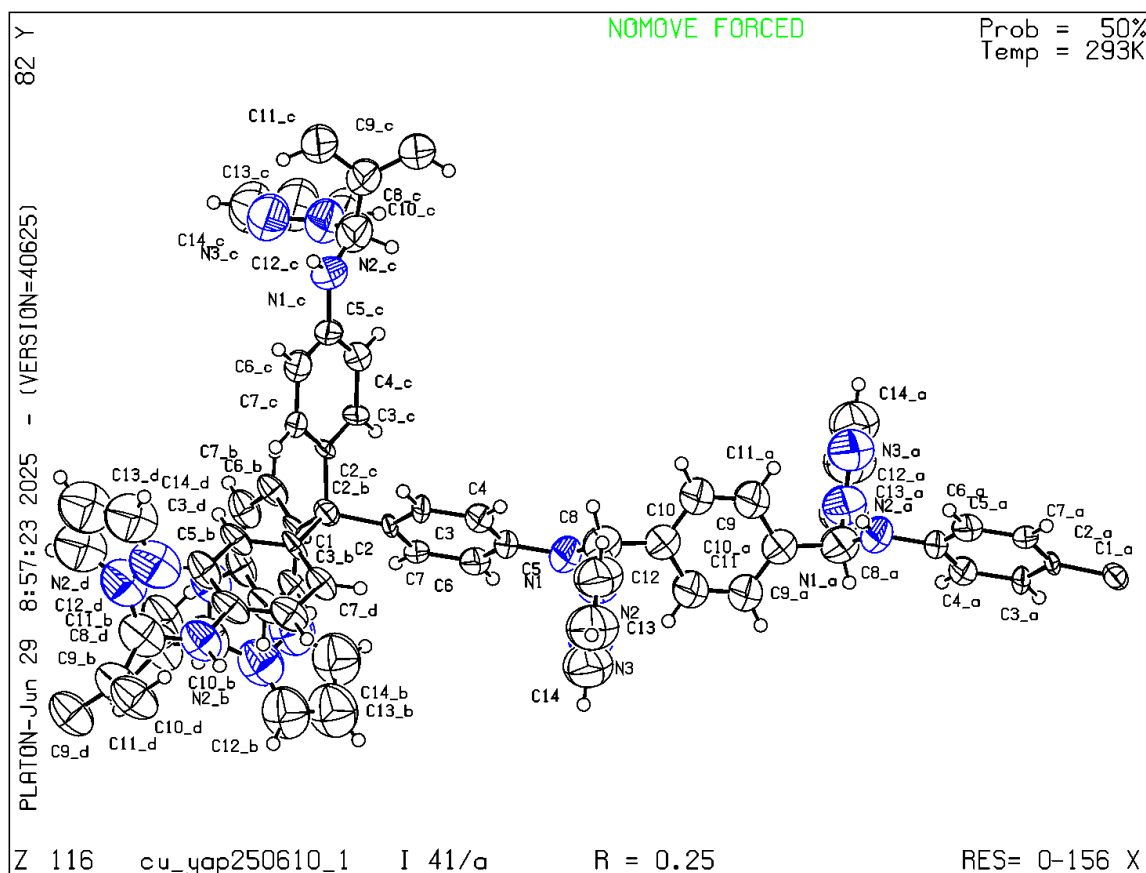

## checkCIF/PLATON report

You have not supplied any structure factors. As a result the full set of tests cannot be run.

THIS REPORT IS FOR GUIDANCE ONLY. IF USED AS PART OF A REVIEW PROCEDURE FOR PUBLICATION, IT SHOULD NOT REPLACE THE EXPERTISE OF AN EXPERIENCED CRYSTALLOGRAPHIC REFEREE.

No syntax errors found.      CIF dictionary      Interpreting this report

### Datablock: imidazole@COF-300

---

Bond precision:      C-C = 0.0057 Å      Wavelength=1.54178

Cell:                      a=26.166(4)      b=26.166(4)      c=7.6048(19)  
                                        alpha=90      beta=90      gamma=90

Temperature:              173 K

|                        | Calculated             | Reported              |
|------------------------|------------------------|-----------------------|
| Volume                 | 5207(2)                | 5206.6(19)            |
| Space group            | I 41/a                 | I 41/a                |
| Hall group             | -I 4ad                 | -I 4ad                |
| Moiety formula         | C41 H28 N4 [+ solvent] | C41 H28 N4, 4[C3N2H4] |
| Sum formula            | C41 H28 N4 [+ solvent] | C53 H44 N12           |
| Mr                     | 576.67                 | 849.00                |
| Dx, g cm <sup>-3</sup> | 0.736                  | 1.083                 |
| Z                      | 4                      | 4                     |
| Mu (mm <sup>-1</sup> ) | 0.338                  | 0.528                 |
| F000                   | 1208.0                 | 1784.0                |
| F000'                  | 1211.24                |                       |
| h, k, lmax             | 25, 25, 7              | 25, 25, 7             |
| Nref                   | 1242                   | 1219                  |
| Tmin, Tmax             | 0.909, 0.934           | 0.840, 0.860          |
| Tmin'                  | 0.900                  |                       |

Correction method= # Reported T Limits: Tmin=0.840 Tmax=0.860  
AbsCorr = MULTI-SCAN

Data completeness= 0.981      Theta(max)= 48.229

R(reflections)= 0.0966( 973)      wR2(reflections)=  
S = 1.006      Npar= 102      0.2867( 1219)



---

The following ALERTS were generated. Each ALERT has the format

**test-name\_ALERT\_alert-type\_alert-level.**

Click on the hyperlinks for more details of the test.

---

[IMAGE] **Alert level A**

THETM01\_ALERT\_3\_A The value of sine(theta\_max)/wavelength is less than 0.550  
Calculated sin(theta\_max)/wavelength = 0.4837

**Author Response: The value of sine(theta\_max)/wavelength is less than 0.550 due to the weak diffraction ability of the crystal. Despite the lower resolution, the data quality is sufficient to support the structural determination and the conclusions drawn in the manuscript. The key features of the structure, such as the molecular packing and framework, are clearly resolved and consistent with the chemical context of the study.**

---

[IMAGE] **Alert level C**

|                   |                                                |         |        |
|-------------------|------------------------------------------------|---------|--------|
| PLAT084_ALERT_3_C | High wr2 Value (i.e. > 0.25) .....             | 0.29    | Report |
| PLAT230_ALERT_2_C | Hirshfeld Test Diff for C3 --C4 .              | 6.2     | s.u.   |
| PLAT230_ALERT_2_C | Hirshfeld Test Diff for C10 --C11 .            | 5.3     | s.u.   |
| PLAT241_ALERT_2_C | High 'MainMol' Ueq as Compared to Neighbors of | C8      | Check  |
| PLAT242_ALERT_2_C | Low 'MainMol' Ueq as Compared to Neighbors of  | C10     | Check  |
| PLAT250_ALERT_2_C | Large U3/U1 Ratio for <U(i,j)> Tensor(Resd 1)  | 2.3     | Note   |
| PLAT260_ALERT_2_C | Large Average Ueq of Residue Including N1      | 0.102   | Check  |
| PLAT340_ALERT_3_C | Low Bond Precision on C-C Bonds .....          | 0.00571 | Ang.   |

---

[IMAGE] **Alert level G**

FORMU01\_ALERT\_2\_G There is a discrepancy between the atom counts in the  
\_chemical\_formula\_sum and the formula from the \_atom\_site\* data.

Atom count from \_chemical\_formula\_sum: C53 H44 N12

Atom count from the \_atom\_site data: C41 H28 N4

CELLZ01\_ALERT\_1\_G Difference between formula and atom\_site contents detected.

CELLZ01\_ALERT\_1\_G ALERT: Large difference may be due to a

symmetry error - see SYMMG tests

From the CIF: \_cell\_formula\_units\_Z 4

From the CIF: \_chemical\_formula\_sum C53 H44 N12

TEST: Compare cell contents of formula and atom\_site data

| atom | Z*formula | cif sites | diff  |
|------|-----------|-----------|-------|
| C    | 212.00    | 164.00    | 48.00 |
| H    | 176.00    | 112.00    | 64.00 |
| N    | 48.00     | 16.00     | 32.00 |

PLAT003\_ALERT\_2\_G Number of Uiso or U(i,j) Restrained non-H-Atoms 6 Report

PLAT041\_ALERT\_1\_G Calc. and Reported SumFormula Strings Differ Please Check

Calc: C41 H28 N4

Rep.: C53 H44 N12

PLAT042\_ALERT\_1\_G Calc. and Reported MoietyFormula Strings Differ Please Check

Calc: C41 H28 N4

Rep.: C41 H28 N4, 4[C3N2H4]

PLAT051\_ALERT\_1\_G Mu(calc) and Mu(cif) Ratio Differs from 1.0 by . 36.04 %

PLAT072\_ALERT\_2\_G SHELXL First Parameter in WGHT Unusually Large 0.20 Report

PLAT177\_ALERT\_4\_G The CIF-Embedded .res File Contains DELU Records 1 Report

```

PLAT186_ALERT_4_G The CIF-Embedded .res File Contains ISOR Records          1 Report
PLAT192_ALERT_3_G A Non-default DELU Restraint Value for First Par      0.0010 Report
PLAT192_ALERT_3_G A Non-default DELU Restraint Value for SecondPar      0.0010 Report
PLAT606_ALERT_4_G Solvent Accessible VOID(S) in Structure .....        ! Info
PLAT804_ALERT_5_G Number of ARU-Code Packing Problem(s) in PLATON       1 Info
PLAT860_ALERT_3_G Number of Least-Squares Restraints .....             21 Note
PLAT868_ALERT_4_G ALERTS Due to the Use of _smtbx_masks Suppressed      ! Info
PLAT933_ALERT_2_G Number of HKL-OMIT Records in Embedded .res File      9 Note
      -4  8  0,  -1  2  1,   0  1  1,   0  2  2,   1  2  1,   2  2  0,
      2  4  0,   4 10  0,   6 12  0,

```

---

```

1 ALERT level A = Most likely a serious problem - resolve or explain
0 ALERT level B = A potentially serious problem, consider carefully
8 ALERT level C = Check. Ensure it is not caused by an omission or oversight
17 ALERT level G = General information/check it is not something unexpected

```

```

5 ALERT type 1 CIF construction/syntax error, inconsistent or missing data
10 ALERT type 2 Indicator that the structure model may be wrong or deficient
6 ALERT type 3 Indicator that the structure quality may be low
4 ALERT type 4 Improvement, methodology, query or suggestion
1 ALERT type 5 Informative message, check

```

---

It is advisable to attempt to resolve as many as possible of the alerts in all categories. Often the minor alerts point to easily fixed oversights, errors and omissions in your CIF or refinement strategy, so attention to these fine details can be worthwhile. In order to resolve some of the more serious problems it may be necessary to carry out additional measurements or structure refinements. However, the purpose of your study may justify the reported deviations and the more serious of these should normally be commented upon in the discussion or experimental section of a paper or in the "special\_details" fields of the CIF. checkCIF was carefully designed to identify outliers and unusual parameters, but every test has its limitations and alerts that are not important in a particular case may appear. Conversely, the absence of alerts does not guarantee there are no aspects of the results needing attention. It is up to the individual to critically assess their own results and, if necessary, seek expert advice.

### **Publication of your CIF in IUCr journals**

A basic structural check has been run on your CIF. These basic checks will be run on all CIFs submitted for publication in IUCr journals (*Acta Crystallographica*, *Journal of Applied Crystallography*, *Journal of Synchrotron Radiation*); however, if you intend to submit to *Acta Crystallographica Section C* or *E* or *IUCrData*, you should make sure that full publication checks are run on the final version of your CIF prior to submission.

### **Publication of your CIF in other journals**

Please refer to the *Notes for Authors* of the relevant journal for any special instructions relating to CIF submission.

PLATON version of 02/02/2025; check.def file version of 02/02/2025

Datablock cu\_yap0708\_1 - ellipsoid plot

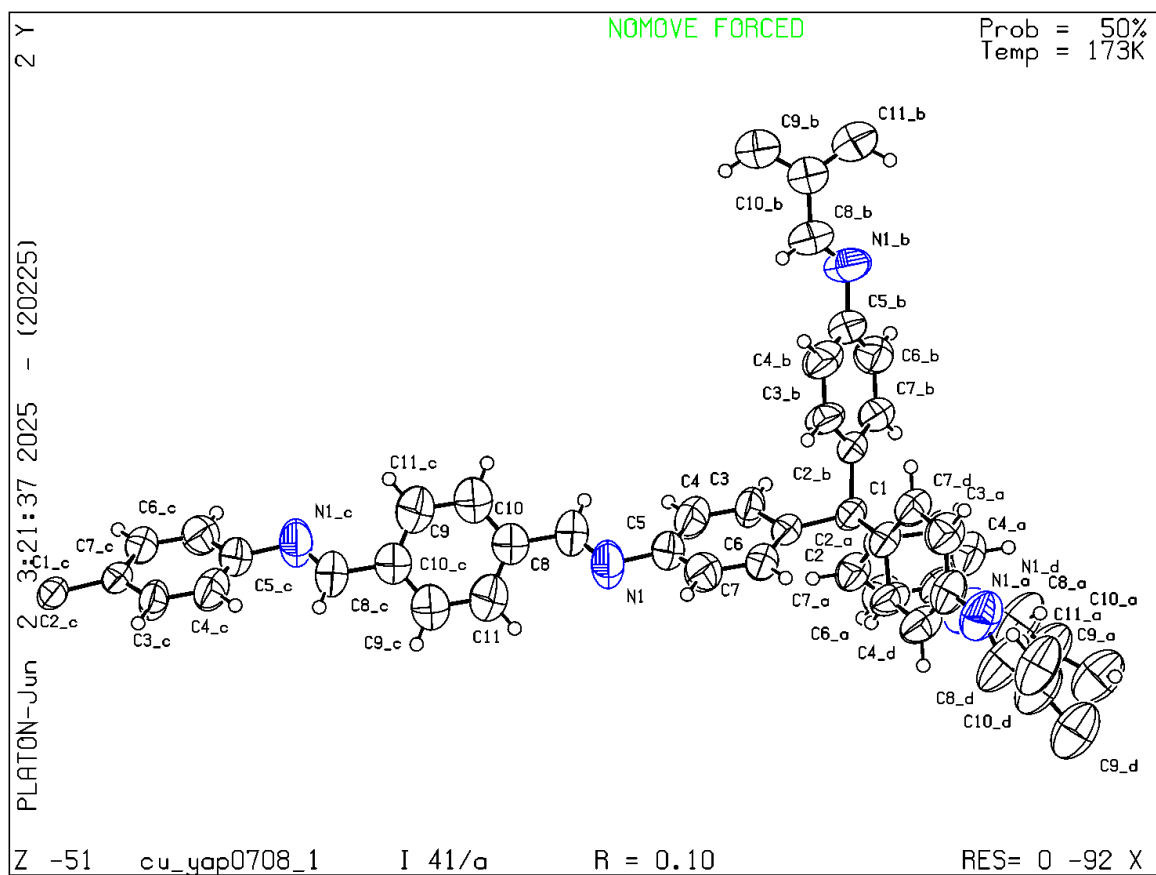

## checkCIF/PLATON report

You have not supplied any structure factors. As a result the full set of tests cannot be run.

THIS REPORT IS FOR GUIDANCE ONLY. IF USED AS PART OF A REVIEW PROCEDURE FOR PUBLICATION, IT SHOULD NOT REPLACE THE EXPERTISE OF AN EXPERIENCED CRYSTALLOGRAPHIC REFEREE.

No syntax errors found.      CIF dictionary      Interpreting this report

### Datablock: 2-Methylimidazole@COF-300

---

Bond precision:      C-C = 0.0057 Å      Wavelength=1.54178

Cell:                      a=26.166(4)      b=26.166(4)      c=7.6048(19)  
                                    alpha=90      beta=90      gamma=90

Temperature:              173 K

|                        | Calculated             | Reported              |
|------------------------|------------------------|-----------------------|
| Volume                 | 5207(2)                | 5206.6(19)            |
| Space group            | I 41/a                 | I 41/a                |
| Hall group             | -I 4ad                 | -I 4ad                |
| Moiety formula         | C41 H28 N4 [+ solvent] | C41 H28 N4, 4[C3N2H4] |
| Sum formula            | C41 H28 N4 [+ solvent] | C53 H44 N12           |
| Mr                     | 576.67                 | 849.00                |
| Dx, g cm <sup>-3</sup> | 0.736                  | 1.083                 |
| Z                      | 4                      | 4                     |
| Mu (mm <sup>-1</sup> ) | 0.338                  | 0.528                 |
| F000                   | 1208.0                 | 1784.0                |
| F000'                  | 1211.24                |                       |
| h, k, lmax             | 25, 25, 7              | 25, 25, 7             |
| Nref                   | 1242                   | 1219                  |
| Tmin, Tmax             | 0.909, 0.934           | 0.840, 0.860          |
| Tmin'                  | 0.900                  |                       |

Correction method= # Reported T Limits: Tmin=0.840 Tmax=0.860  
AbsCorr = MULTI-SCAN

Data completeness= 0.981      Theta(max)= 48.229

R(reflections)= 0.0966( 973)

wR2(reflections)=  
0.2867( 1219)

S = 1.006

Npar= 102

---

The following ALERTS were generated. Each ALERT has the format

**test-name\_ALERT\_alert-type\_alert-level.**

Click on the hyperlinks for more details of the test.

---

[IMAGE] **Alert level A**

THETM01\_ALERT\_3\_A The value of sine(theta\_max)/wavelength is less than 0.550  
Calculated sin(theta\_max)/wavelength = 0.4837

**Author Response: The value of sine(theta\_max)/wavelength is less than 0.550 due to the weak diffraction ability of the crystal. Despite the lower resolution, the data quality is sufficient to support the structural determination and the conclusions drawn in the manuscript. The key features of the structure, such as the molecular packing and framework, are clearly resolved and consistent with the chemical context of the study.**

---

[IMAGE] **Alert level C**

|                   |                                                |         |        |
|-------------------|------------------------------------------------|---------|--------|
| PLAT084_ALERT_3_C | High wr2 Value (i.e. > 0.25) .....             | 0.29    | Report |
| PLAT230_ALERT_2_C | Hirshfeld Test Diff for C3 --C4 .              | 6.2     | s.u.   |
| PLAT230_ALERT_2_C | Hirshfeld Test Diff for C10 --C11 .            | 5.3     | s.u.   |
| PLAT241_ALERT_2_C | High 'MainMol' Ueq as Compared to Neighbors of | C8      | Check  |
| PLAT242_ALERT_2_C | Low 'MainMol' Ueq as Compared to Neighbors of  | C10     | Check  |
| PLAT250_ALERT_2_C | Large U3/U1 Ratio for <U(i,j)> Tensor(Resd 1)  | 2.3     | Note   |
| PLAT260_ALERT_2_C | Large Average Ueq of Residue Including N1      | 0.102   | Check  |
| PLAT340_ALERT_3_C | Low Bond Precision on C-C Bonds .....          | 0.00571 | Ang.   |

---

[IMAGE] **Alert level G**

FORMU01\_ALERT\_2\_G There is a discrepancy between the atom counts in the  
\_chemical\_formula\_sum and the formula from the \_atom\_site\* data.

Atom count from \_chemical\_formula\_sum: C53 H44 N12

Atom count from the \_atom\_site data: C41 H28 N4

CELLZ01\_ALERT\_1\_G Difference between formula and atom\_site contents detected.

CELLZ01\_ALERT\_1\_G ALERT: Large difference may be due to a

symmetry error - see SYMMG tests

From the CIF: \_cell\_formula\_units\_Z 4

From the CIF: \_chemical\_formula\_sum C53 H44 N12

TEST: Compare cell contents of formula and atom\_site data

| atom | Z*formula | cif sites | diff  |
|------|-----------|-----------|-------|
| C    | 212.00    | 164.00    | 48.00 |
| H    | 176.00    | 112.00    | 64.00 |
| N    | 48.00     | 16.00     | 32.00 |

PLAT003\_ALERT\_2\_G Number of Uiso or U(i,j) Restrained non-H-Atoms 6 Report

PLAT041\_ALERT\_1\_G Calc. and Reported SumFormula Strings Differ Please Check

Calc: C41 H28 N4

Rep.: C53 H44 N12

PLAT042\_ALERT\_1\_G Calc. and Reported MoietyFormula Strings Differ Please Check

Calc: C41 H28 N4

Rep.: C41 H28 N4, 4[C3N2H4]

PLAT051\_ALERT\_1\_G Mu(calc) and Mu(cif) Ratio Differs from 1.0 by . 36.04 %

PLAT072\_ALERT\_2\_G SHELXL First Parameter in WGHT Unusually Large 0.20 Report

PLAT177\_ALERT\_4\_G The CIF-Embedded .res File Contains DELU Records 1 Report

|                   |                                                  |        |        |
|-------------------|--------------------------------------------------|--------|--------|
| PLAT186_ALERT_4_G | The CIF-Embedded .res File Contains ISOR Records | 1      | Report |
| PLAT192_ALERT_3_G | A Non-default DELU Restraint Value for First Par | 0.0010 | Report |
| PLAT192_ALERT_3_G | A Non-default DELU Restraint Value for SecondPar | 0.0010 | Report |
| PLAT606_ALERT_4_G | Solvent Accessible VOID(S) in Structure .....    |        | ! Info |
| PLAT804_ALERT_5_G | Number of ARU-Code Packing Problem(s) in PLATON  |        | 1 Info |
| PLAT860_ALERT_3_G | Number of Least-Squares Restraints .....         | 21     | Note   |
| PLAT868_ALERT_4_G | ALERTS Due to the Use of _smtbx_masks Suppressed |        | ! Info |
| PLAT933_ALERT_2_G | Number of HKL-OMIT Records in Embedded .res File |        | 9 Note |
|                   | -4 8 0, -1 2 1, 0 1 1, 0 2 2, 1 2 1, 2 2 0,      |        |        |
|                   | 2 4 0, 4 10 0, 6 12 0,                           |        |        |

---

1 **ALERT level A** = Most likely a serious problem - resolve or explain  
0 **ALERT level B** = A potentially serious problem, consider carefully  
8 **ALERT level C** = Check. Ensure it is not caused by an omission or oversight  
17 **ALERT level G** = General information/check it is not something unexpected

5 ALERT type 1 CIF construction/syntax error, inconsistent or missing data  
10 ALERT type 2 Indicator that the structure model may be wrong or deficient  
6 ALERT type 3 Indicator that the structure quality may be low  
4 ALERT type 4 Improvement, methodology, query or suggestion  
1 ALERT type 5 Informative message, check

---

It is advisable to attempt to resolve as many as possible of the alerts in all categories. Often the minor alerts point to easily fixed oversights, errors and omissions in your CIF or refinement strategy, so attention to these fine details can be worthwhile. In order to resolve some of the more serious problems it may be necessary to carry out additional measurements or structure refinements. However, the purpose of your study may justify the reported deviations and the more serious of these should normally be commented upon in the discussion or experimental section of a paper or in the "special\_details" fields of the CIF. checkCIF was carefully designed to identify outliers and unusual parameters, but every test has its limitations and alerts that are not important in a particular case may appear. Conversely, the absence of alerts does not guarantee there are no aspects of the results needing attention. It is up to the individual to critically assess their own results and, if necessary, seek expert advice.

### **Publication of your CIF in IUCr journals**

A basic structural check has been run on your CIF. These basic checks will be run on all CIFs submitted for publication in IUCr journals (*Acta Crystallographica*, *Journal of Applied Crystallography*, *Journal of Synchrotron Radiation*); however, if you intend to submit to *Acta Crystallographica Section C* or *E* or *IUCrData*, you should make sure that full publication checks are run on the final version of your CIF prior to submission.

### **Publication of your CIF in other journals**

Please refer to the *Notes for Authors* of the relevant journal for any special instructions relating to CIF submission.

PLATON version of 02/02/2025; check.def file version of 02/02/2025

Datablock cu\_yap0708\_1 - ellipsoid plot

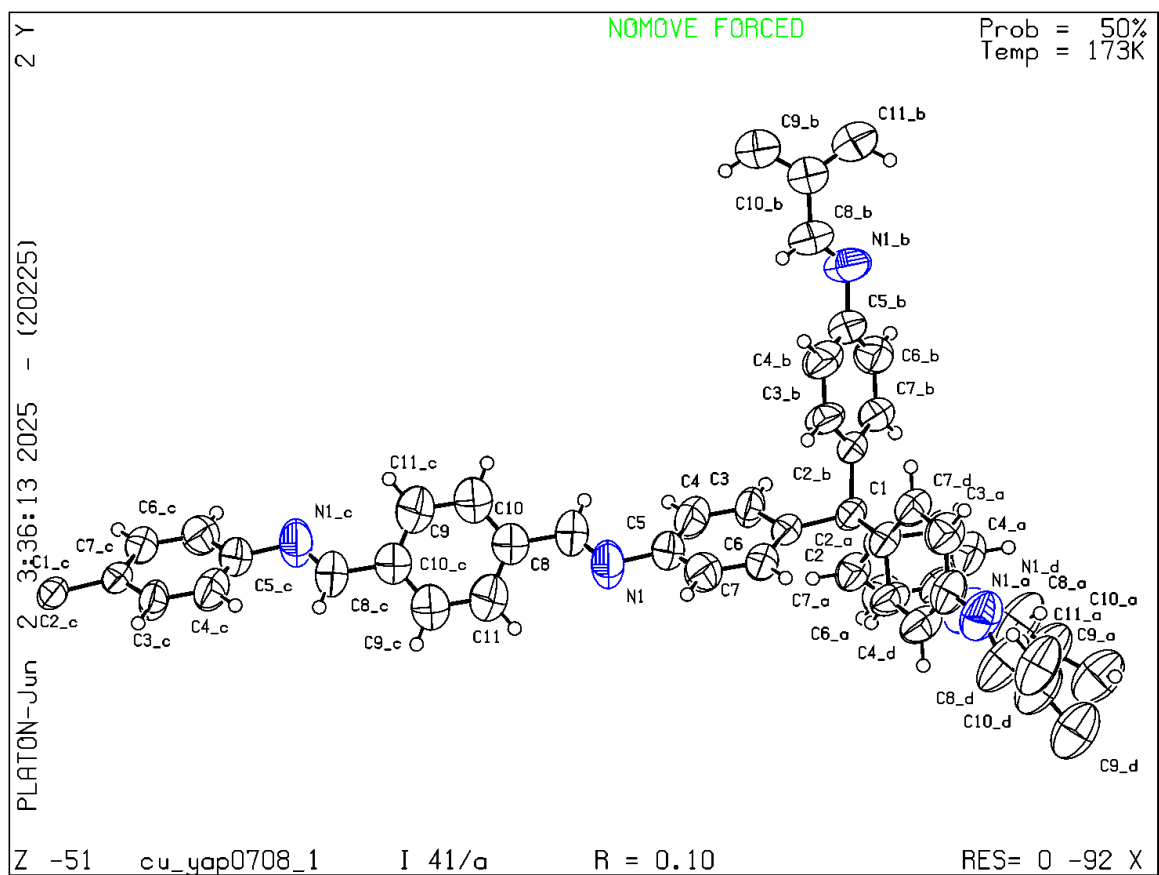

## checkCIF/PLATON report

You have not supplied any structure factors. As a result the full set of tests cannot be run.

THIS REPORT IS FOR GUIDANCE ONLY. IF USED AS PART OF A REVIEW PROCEDURE FOR PUBLICATION, IT SHOULD NOT REPLACE THE EXPERTISE OF AN EXPERIENCED CRYSTALLOGRAPHIC REFEREE.

No syntax errors found.      CIF dictionary      Interpreting this report

### Datablock: 2-Ethylimidazole@COF-300

---

Bond precision:      C-C = 0.0049 Å      Wavelength=1.54178

Cell:                      a=26.5843(17)      b=26.5843(17)      c=7.4767(8)  
                                    alpha=90      beta=90      gamma=90

Temperature:              293 K

|                        | Calculated             | Reported     |
|------------------------|------------------------|--------------|
| Volume                 | 5284.0(9)              | 5284.0(9)    |
| Space group            | I -4                   | I -4         |
| Hall group             | I -4                   | I -4         |
| Moiety formula         | C41 H26 N4 [+ solvent] | C41 H26 N4   |
| Sum formula            | C41 H26 N4 [+ solvent] | C41 H26 N4   |
| Mr                     | 574.66                 | 574.66       |
| Dx, g cm <sup>-3</sup> | 0.722                  | 0.722        |
| Z                      | 4                      | 4            |
| Mu (mm <sup>-1</sup> ) | 0.333                  | 0.333        |
| F000                   | 1200.0                 | 1200.0       |
| F000'                  | 1203.24                |              |
| h, k, lmax             | 30, 30, 8              | 30, 26, 8    |
| Nref                   | 4408 [ 2392]           | 4239         |
| Tmin, Tmax             | 0.942, 0.958           | 0.512, 0.752 |
| Tmin'                  | 0.936                  |              |

Correction method= # Reported T Limits: Tmin=0.512 Tmax=0.752  
AbsCorr = MULTI-SCAN

Data completeness= 1.77/0.96      Theta(max)= 64.058

R(reflections)= 0.0512( 2527)

wR2(reflections)=  
0.1493( 4239)

S = 0.934

Npar= 204



---

The following ALERTS were generated. Each ALERT has the format

**test-name\_ALERT\_alert-type\_alert-level.**

Click on the hyperlinks for more details of the test.

---

[IMAGE] **Alert level C**

STRVA01\_ALERT\_2\_C Chirality of atom sites is inverted?  
From the CIF: `_refine_ls_abs_structure_Flack` 0.800  
From the CIF: `_refine_ls_abs_structure_Flack_su` 0.700  
THETM01\_ALERT\_3\_C The value of  $\sin(\theta_{\max})/\lambda$  is less than 0.590  
Calculated  $\sin(\theta_{\max})/\lambda = 0.5832$   
PLAT029\_ALERT\_3\_C `_diffraction_measured_fraction_theta_full` value Low . 0.977 Why?  
PLAT230\_ALERT\_2\_C Hirshfeld Test Diff for C4 --C5 . 6.0 s.u.  
PLAT230\_ALERT\_2\_C Hirshfeld Test Diff for C9 --C14 . 6.4 s.u.  
PLAT241\_ALERT\_2\_C High 'MainMol' Ueq as Compared to Neighbors of C13 Check  
PLAT334\_ALERT\_2\_C Small <C-C> Benzene Dist. C2 -C7 . 1.37 Ang.  
PLAT334\_ALERT\_2\_C Small <C-C> Benzene Dist. C17 -C22 . 1.36 Ang.  
PLAT340\_ALERT\_3\_C Low Bond Precision on C-C Bonds ..... 0.00493 Ang.  
PLAT767\_ALERT\_4\_C INS Embedded LIST 6 Instruction Should be LIST 4 Please Check  
PLAT907\_ALERT\_2\_C Flack  $x > 0.5$ , Structure Needs to be Inverted? . 0.80 Check

---

[IMAGE] **Alert level G**

PLAT003\_ALERT\_2\_G Number of Uiso or U(i,j) Restrained non-H-Atoms 14 Report  
PLAT032\_ALERT\_4\_G Std. Uncertainty on Flack Parameter Value High . 0.700 Report  
PLAT177\_ALERT\_4\_G The CIF-Embedded .res File Contains DELU Records 1 Report  
PLAT186\_ALERT\_4\_G The CIF-Embedded .res File Contains ISOR Records 2 Report  
PLAT192\_ALERT\_3\_G A Non-default DELU Restraint Value for First Par 0.0010 Report  
PLAT192\_ALERT\_3\_G A Non-default DELU Restraint Value for SecondPar 0.0010 Report  
PLAT199\_ALERT\_1\_G Reported `_cell_measurement_temperature` ..... (K) 293 Check  
PLAT200\_ALERT\_1\_G Reported `_diffraction_ambient_temperature` ..... (K) 293 Check  
PLAT343\_ALERT\_2\_G Unusual sp? Angle Range in Main Residue for C14 Check  
PLAT606\_ALERT\_4\_G Solvent Accessible VOID(S) in Structure ..... ! Info  
PLAT804\_ALERT\_5\_G Number of ARU-Code Packing Problem(s) in PLATON 7 Info  
PLAT860\_ALERT\_3\_G Number of Least-Squares Restraints ..... 45 Note  
PLAT868\_ALERT\_4\_G ALERTS Due to the Use of `_smtbx_masks` Suppressed ! Info  
PLAT933\_ALERT\_2\_G Number of HKL-OMIT Records in Embedded .res File 6 Note  
-1 3 0, 0 10 0, 1 1 0, 1 3 0, 2 4 0, 4 8 0,  
PLAT951\_ALERT\_5\_G Calculated (ThMax) and CIF-Reported Kmax Differ 4 Units

---

0 **ALERT level A** = Most likely a serious problem - resolve or explain  
0 **ALERT level B** = A potentially serious problem, consider carefully  
11 **ALERT level C** = Check. Ensure it is not caused by an omission or oversight  
15 **ALERT level G** = General information/check it is not something unexpected

2 ALERT type 1 CIF construction/syntax error, inconsistent or missing data  
10 ALERT type 2 Indicator that the structure model may be wrong or deficient  
6 ALERT type 3 Indicator that the structure quality may be low  
6 ALERT type 4 Improvement, methodology, query or suggestion  
2 ALERT type 5 Informative message, check

---

It is advisable to attempt to resolve as many as possible of the alerts in all categories. Often the minor alerts point to easily fixed oversights, errors and omissions in your CIF or refinement strategy, so attention to these fine details can be worthwhile. In order to resolve some of the more serious problems it may be necessary to carry out additional measurements or structure refinements. However, the purpose of your study may justify the reported deviations and the more serious of these should normally be commented upon in the discussion or experimental section of a paper or in the "special\_details" fields of the CIF. checkCIF was carefully designed to identify outliers and unusual parameters, but every test has its limitations and alerts that are not important in a particular case may appear. Conversely, the absence of alerts does not guarantee there are no aspects of the results needing attention. It is up to the individual to critically assess their own results and, if necessary, seek expert advice.

### **Publication of your CIF in IUCr journals**

A basic structural check has been run on your CIF. These basic checks will be run on all CIFs submitted for publication in IUCr journals (*Acta Crystallographica*, *Journal of Applied Crystallography*, *Journal of Synchrotron Radiation*); however, if you intend to submit to *Acta Crystallographica Section C* or *E* or *IUCrData*, you should make sure that full publication checks are run on the final version of your CIF prior to submission.

### **Publication of your CIF in other journals**

Please refer to the *Notes for Authors* of the relevant journal for any special instructions relating to CIF submission.

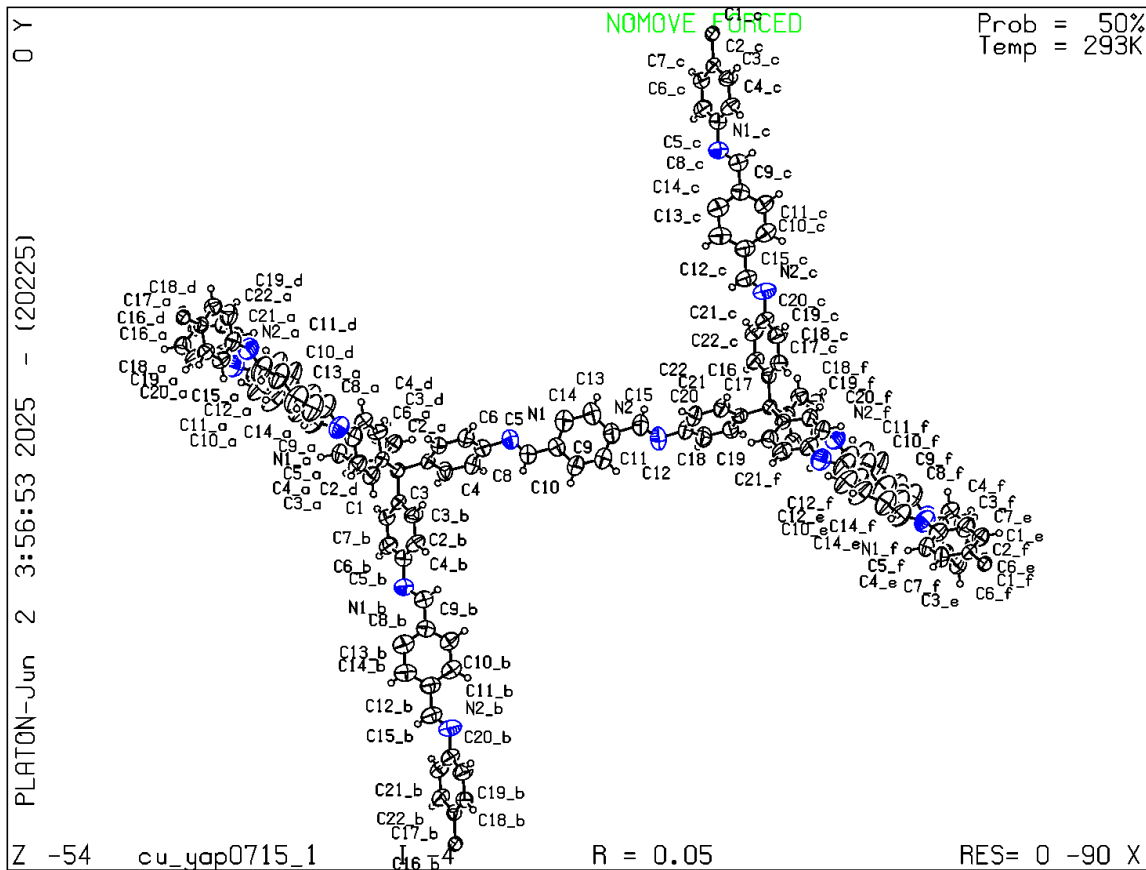

## checkCIF/PLATON report

You have not supplied any structure factors. As a result the full set of tests cannot be run.

THIS REPORT IS FOR GUIDANCE ONLY. IF USED AS PART OF A REVIEW PROCEDURE FOR PUBLICATION, IT SHOULD NOT REPLACE THE EXPERTISE OF AN EXPERIENCED CRYSTALLOGRAPHIC REFEREE.

No syntax errors found.      CIF dictionary      Interpreting this report

### Datablock: benzimidazole@COF-300

---

Bond precision:      C-C = 0.0051 Å      Wavelength=1.54178

Cell:                      a=27.031 (5)                      b=27.031 (5)                      c=7.394 (2)  
                                    alpha=90                      beta=90                      gamma=90

Temperature:              173 K

|                        | Calculated             | Reported              |
|------------------------|------------------------|-----------------------|
| Volume                 | 5403 (2)               | 5402 (3)              |
| Space group            | I 41/a                 | I 41/a                |
| Hall group             | -I 4ad                 | -I 4ad                |
| Moiety formula         | C41 H28 N4 [+ solvent] | C41 H28 N4, 4[C7N2H6] |
| Sum formula            | C41 H28 N4 [+ solvent] | C41 H28 N4            |
| Mr                     | 576.67                 | 576.67                |
| Dx, g cm <sup>-3</sup> | 0.709                  | 0.709                 |
| Z                      | 4                      | 4                     |
| Mu (mm <sup>-1</sup> ) | 0.325                  | 0.326                 |
| F000                   | 1208.0                 | 1208.0                |
| F000'                  | 1211.24                |                       |
| h, k, lmax             | 27, 27, 7              | 26, 27, 7             |
| Nref                   | 1522                   | 1501                  |
| Tmin, Tmax             | 0.943, 0.959           | 0.840, 0.860          |
| Tmin'                  | 0.937                  |                       |

Correction method= # Reported T Limits: Tmin=0.840 Tmax=0.860  
AbsCorr = MULTI-SCAN

Data completeness= 0.986                      Theta(max)= 52.212

R(reflections)= 0.0901 ( 1235)

wR2(reflections)=  
0.2705 ( 1501)

S = 1.106

Npar= 102

---

The following ALERTS were generated. Each ALERT has the format

**test-name\_ALERT\_alert-type\_alert-level.**

Click on the hyperlinks for more details of the test.

---

[IMAGE] **Alert level A**

THETM01\_ALERT\_3\_A The value of sine(theta\_max)/wavelength is less than 0.550  
Calculated sin(theta\_max)/wavelength = 0.5126

**Author Response: The value of sine(theta\_max)/wavelength is less than 0.550 due to the weak diffraction ability of the crystal. Despite the lower resolution, the data quality is sufficient to support the structural determination and the conclusions drawn in the manuscript. The key features of the structure, such as the molecular packing and framework, are clearly resolved and consistent with the chemical context of the study.**

---

[IMAGE] **Alert level C**

|                                                                 |         |        |
|-----------------------------------------------------------------|---------|--------|
| PLAT084_ALERT_3_C High wr2 Value (i.e. > 0.25) .....            | 0.27    | Report |
| PLAT230_ALERT_2_C Hirshfeld Test Diff for C9 --C10 .            | 5.7     | s.u.   |
| PLAT250_ALERT_2_C Large U3/U1 Ratio for <U(i,j)> Tensor(Resd 1) | 2.5     | Note   |
| PLAT260_ALERT_2_C Large Average Ueq of Residue Including N1     | 0.102   | Check  |
| PLAT340_ALERT_3_C Low Bond Precision on C-C Bonds .....         | 0.00507 | Ang.   |

---

[IMAGE] **Alert level G**

FORMU01\_ALERT\_1\_G There is a discrepancy between the atom counts in the  
\_chemical\_formula\_sum and \_chemical\_formula\_moiety. This is  
usually due to the moiety formula being in the wrong format.  
Atom count from \_chemical\_formula\_sum: C41 H28 N4  
Atom count from \_chemical\_formula\_moiety:C69 H52 N12

|                                                                    |        |              |
|--------------------------------------------------------------------|--------|--------------|
| PLAT003_ALERT_2_G Number of Uiso or U(i,j) Restrained non-H-Atoms  | 5      | Report       |
| PLAT042_ALERT_1_G Calc. and Reported MoietyFormula Strings Differ  |        | Please Check |
| Calc: C41 H28 N4<br>Rep.: C41 H28 N4, 4[C7N2H6]                    |        |              |
| PLAT072_ALERT_2_G SHELXL First Parameter in WGHT Unusually Large   | 0.15   | Report       |
| PLAT177_ALERT_4_G The CIF-Embedded .res File Contains DELU Records | 1      | Report       |
| PLAT186_ALERT_4_G The CIF-Embedded .res File Contains ISOR Records | 1      | Report       |
| PLAT192_ALERT_3_G A Non-default DELU Restraint Value for First Par | 0.0010 | Report       |
| PLAT192_ALERT_3_G A Non-default DELU Restraint Value for SecondPar | 0.0010 | Report       |
| PLAT606_ALERT_4_G Solvent Accessible VOID(S) in Structure .....    |        | ! Info       |
| PLAT804_ALERT_5_G Number of ARU-Code Packing Problem(s) in PLATON  | 1      | Info         |
| PLAT860_ALERT_3_G Number of Least-Squares Restraints .....         | 19     | Note         |
| PLAT868_ALERT_4_G ALERTS Due to the Use of _smtbx_masks Suppressed |        | ! Info       |

---

- 1 **ALERT level A** = Most likely a serious problem - resolve or explain  
0 **ALERT level B** = A potentially serious problem, consider carefully  
5 **ALERT level C** = Check. Ensure it is not caused by an omission or oversight  
12 **ALERT level G** = General information/check it is not something unexpected

2 ALERT type 1 CIF construction/syntax error, inconsistent or missing data

5 ALERT type 2 Indicator that the structure model may be wrong or deficient  
6 ALERT type 3 Indicator that the structure quality may be low  
4 ALERT type 4 Improvement, methodology, query or suggestion  
1 ALERT type 5 Informative message, check

---

---

It is advisable to attempt to resolve as many as possible of the alerts in all categories. Often the minor alerts point to easily fixed oversights, errors and omissions in your CIF or refinement strategy, so attention to these fine details can be worthwhile. In order to resolve some of the more serious problems it may be necessary to carry out additional measurements or structure refinements. However, the purpose of your study may justify the reported deviations and the more serious of these should normally be commented upon in the discussion or experimental section of a paper or in the "special\_details" fields of the CIF. checkCIF was carefully designed to identify outliers and unusual parameters, but every test has its limitations and alerts that are not important in a particular case may appear. Conversely, the absence of alerts does not guarantee there are no aspects of the results needing attention. It is up to the individual to critically assess their own results and, if necessary, seek expert advice.

#### **Publication of your CIF in IUCr journals**

A basic structural check has been run on your CIF. These basic checks will be run on all CIFs submitted for publication in IUCr journals (*Acta Crystallographica*, *Journal of Applied Crystallography*, *Journal of Synchrotron Radiation*); however, if you intend to submit to *Acta Crystallographica Section C* or *E* or *IUCrData*, you should make sure that full publication checks are run on the final version of your CIF prior to submission.

#### **Publication of your CIF in other journals**

Please refer to the *Notes for Authors* of the relevant journal for any special instructions relating to CIF submission.

---

**PLATON version of 02/02/2025; check.def file version of 02/02/2025**

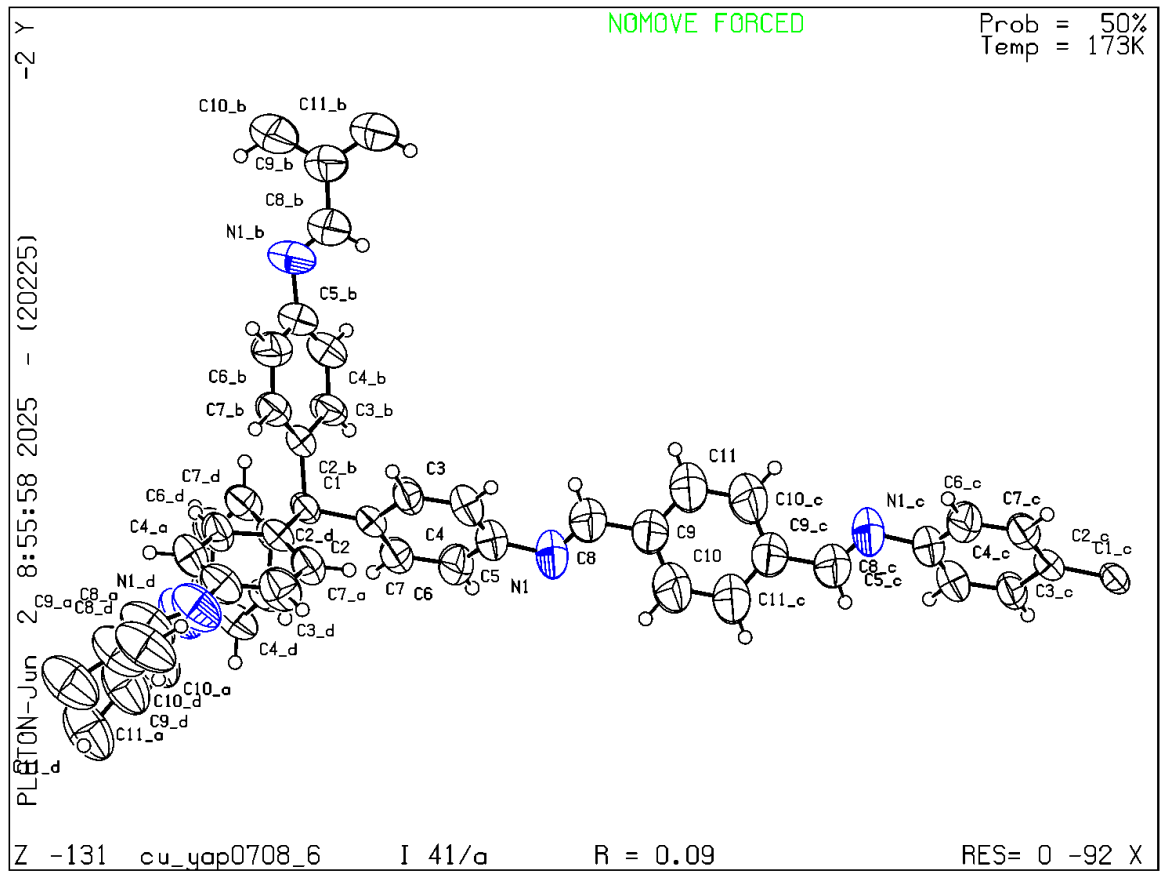

## checkCIF/PLATON report

You have not supplied any structure factors. As a result the full set of tests cannot be run.

THIS REPORT IS FOR GUIDANCE ONLY. IF USED AS PART OF A REVIEW PROCEDURE FOR PUBLICATION, IT SHOULD NOT REPLACE THE EXPERTISE OF AN EXPERIENCED CRYSTALLOGRAPHIC REFEREE.

No syntax errors found.      CIF dictionary      Interpreting this report

### Datablock: benzotriazole@COF-300

---

Bond precision:      C-C = 0.0094 Å      Wavelength=1.54178

Cell:                      a=26.659(2)              b=26.659(2)              c=7.4645(8)  
                                    alpha=90              beta=90              gamma=90

Temperature:              173 K

|                        | Calculated             | Reported     |
|------------------------|------------------------|--------------|
| Volume                 | 5305.0(10)             | 5304.9(10)   |
| Space group            | I 41/a                 | I 41/a       |
| Hall group             | -I 4ad                 | -I 4ad       |
| Moiety formula         | C41 H28 N4 [+ solvent] | C41 H28 N4   |
| Sum formula            | C41 H28 N4 [+ solvent] | C41 H28 N4   |
| Mr                     | 576.67                 | 576.67       |
| Dx, g cm <sup>-3</sup> | 0.722                  | 0.722        |
| Z                      | 4                      | 4            |
| Mu (mm <sup>-1</sup> ) | 0.331                  | 0.331        |
| F000                   | 1208.0                 | 1208.0       |
| F000'                  | 1211.24                |              |
| h, k, lmax             | 25, 25, 7              | 25, 25, 7    |
| Nref                   | 1237                   | 1226         |
| Tmin, Tmax             | 0.942, 0.958           | 0.490, 0.752 |
| Tmin'                  | 0.936                  |              |

Correction method= # Reported T Limits: Tmin=0.490 Tmax=0.752  
AbsCorr = MULTI-SCAN

Data completeness= 0.991              Theta(max)= 47.790

R(reflections)= 0.1417( 913)

wR2(reflections)=  
0.3662( 1226)

S = 1.058

Npar= 103



---

The following ALERTS were generated. Each ALERT has the format

**test-name\_ALERT\_alert-type\_alert-level.**

Click on the hyperlinks for more details of the test.

---

[IMAGE] **Alert level A**

THETM01\_ALERT\_3\_A The value of sine(theta\_max)/wavelength is less than 0.550  
Calculated sin(theta\_max)/wavelength = 0.4804

**Author Response: The value of sine(theta\_max)/wavelength is less than 0.550  
RESPONSE: The value of sine(theta\_max)/wavelength is less than 0.550 The value of  
sine(theta\_max)/wavelength is less than 0.550 due to the weak diffraction ability of the  
crystal. Despite the lower resolution, the data quality is sufficient to support the  
structural determination and the conclusions drawn in the manuscript. The key  
features of the structure, such as the molecular packing and framework, are clearly  
resolved and consistent with the chemical context of the study.**

---

[IMAGE] **Alert level B**

PLAT084\_ALERT\_3\_B High wR2 Value (i.e. > 0.25) ..... 0.37 Report

**Author Response: The high wR2 value is likely due to the relatively weak  
diffraction data obtained from the crystal. Despite efforts to optimize data  
collection, the crystal quality was not ideal, resulting in higher uncertainties in  
the refinement. However, the structural model is consistent with the chemical  
expectations and other validation metrics (e.g., R1, GooF) are within acceptable  
ranges. We believe the reported structure is reliable despite the elevated wR2  
value.**

---

[IMAGE] **Alert level C**

|                                                                 |         |        |
|-----------------------------------------------------------------|---------|--------|
| PLAT082_ALERT_2_C High R1 Value .....                           | 0.14    | Report |
| PLAT220_ALERT_2_C NonSolvent Resd 1 C Ueq(max)/Ueq(min) Range   | 3.5     | Ratio  |
| PLAT234_ALERT_4_C Large Hirshfeld Difference N1 --C5 .          | 0.17    | Ang.   |
| PLAT234_ALERT_4_C Large Hirshfeld Difference N1 --C8 .          | 0.20    | Ang.   |
| PLAT250_ALERT_2_C Large U3/U1 Ratio for <U(i,j)> Tensor(Resd 1) | 3.5     | Note   |
| PLAT260_ALERT_2_C Large Average Ueq of Residue Including N1     | 0.121   | Check  |
| PLAT334_ALERT_2_C Small <C-C> Benzene Dist. C2 -C7 .            | 1.37    | Ang.   |
| PLAT340_ALERT_3_C Low Bond Precision on C-C Bonds .....         | 0.00943 | Ang.   |

---

[IMAGE] **Alert level G**

|                                                                    |        |        |
|--------------------------------------------------------------------|--------|--------|
| PLAT003_ALERT_2_G Number of Uiso or U(i,j) Restrained non-H-Atoms  | 11     | Report |
| PLAT072_ALERT_2_G SHELXL First Parameter in WGHT Unusually Large   | 0.20   | Report |
| PLAT083_ALERT_2_G SHELXL Second Parameter in WGHT Unusually Large  | 16.00  | Why ?  |
| PLAT177_ALERT_4_G The CIF-Embedded .res File Contains DELU Records | 1      | Report |
| PLAT186_ALERT_4_G The CIF-Embedded .res File Contains ISOR Records | 1      | Report |
| PLAT192_ALERT_3_G A Non-default DELU Restraint Value for First Par | 0.0010 | Report |

|                   |                                                  |        |        |
|-------------------|--------------------------------------------------|--------|--------|
| PLAT192_ALERT_3_G | A Non-default DELU Restraint Value for SecondPar | 0.0010 | Report |
| PLAT606_ALERT_4_G | Solvent Accessible VOID(S) in Structure .....    |        | ! Info |
| PLAT804_ALERT_5_G | Number of ARU-Code Packing Problem(s) in PLATON  |        | 1 Info |
| PLAT860_ALERT_3_G | Number of Least-Squares Restraints .....         | 45     | Note   |
| PLAT868_ALERT_4_G | ALERTS Due to the Use of _smtbx_masks Suppressed |        | ! Info |

---

1 **ALERT level A** = Most likely a serious problem - resolve or explain  
1 **ALERT level B** = A potentially serious problem, consider carefully  
8 **ALERT level C** = Check. Ensure it is not caused by an omission or oversight  
11 **ALERT level G** = General information/check it is not something unexpected

0 ALERT type 1 CIF construction/syntax error, inconsistent or missing data  
8 ALERT type 2 Indicator that the structure model may be wrong or deficient  
6 ALERT type 3 Indicator that the structure quality may be low  
6 ALERT type 4 Improvement, methodology, query or suggestion  
1 ALERT type 5 Informative message, check

---

It is advisable to attempt to resolve as many as possible of the alerts in all categories. Often the minor alerts point to easily fixed oversights, errors and omissions in your CIF or refinement strategy, so attention to these fine details can be worthwhile. In order to resolve some of the more serious problems it may be necessary to carry out additional measurements or structure refinements. However, the purpose of your study may justify the reported deviations and the more serious of these should normally be commented upon in the discussion or experimental section of a paper or in the "special\_details" fields of the CIF. checkCIF was carefully designed to identify outliers and unusual parameters, but every test has its limitations and alerts that are not important in a particular case may appear. Conversely, the absence of alerts does not guarantee there are no aspects of the results needing attention. It is up to the individual to critically assess their own results and, if necessary, seek expert advice.

### **Publication of your CIF in IUCr journals**

A basic structural check has been run on your CIF. These basic checks will be run on all CIFs submitted for publication in IUCr journals (*Acta Crystallographica*, *Journal of Applied Crystallography*, *Journal of Synchrotron Radiation*); however, if you intend to submit to *Acta Crystallographica Section C* or *E* or *IUCrData*, you should make sure that full publication checks are run on the final version of your CIF prior to submission.

### **Publication of your CIF in other journals**

Please refer to the *Notes for Authors* of the relevant journal for any special instructions relating to CIF submission.

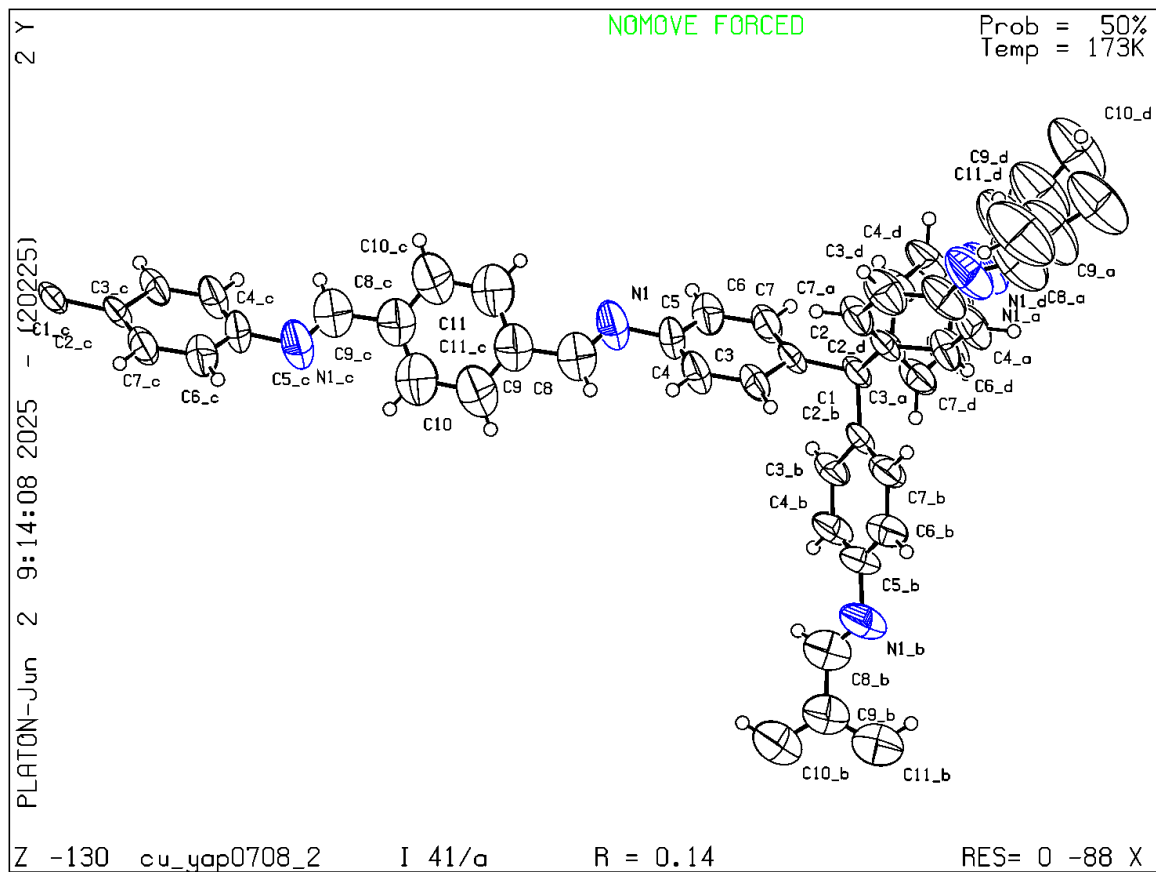

Supplement: Supplementary file 1 [file b5add79d5496782ea3315996.pdf]
