# Supplementary material for: Enhanced proton conductivity in azole-functionalized 3D single-crystalline COFs achieved via solvent-free melt-phase postsynthetic modification
Source: Research Square preprint supplement (doi:10.21203/rs.3.rs-7003536/v1), 2025-08-21
Supplement: Supplementary file 2 [file dc0add2b160c0e44469e2dc0.pdf]

## Supplementary Information

### **Enhanced proton conductivity in azole-functionalized 3D single-crystalline COFs achieved via solvent-free melt-phase postsynthetic modification**

Aiping Yao<sup>1,4</sup>, Changyan Zhu<sup>1,4</sup>, Jun Liu<sup>1</sup>, Hongliang Xu<sup>1</sup>, Kuizhan Shao<sup>1</sup>, Chunyi Sun<sup>1\*</sup>, Chao Qin<sup>1</sup>, Xinlong Wang<sup>1\*</sup>, Hongying Zang<sup>1</sup>, Zhongmin Su<sup>2</sup>, Donglin Jiang<sup>3\*</sup>

<sup>1</sup>Key Laboratory of Polyoxometalate and Reticular Material Chemistry of Ministry of Education, Northeast Normal University, Changchun 130024, China.

<sup>2</sup> School of Chemistry and Chemical Engineering, Hainan University, Haikou 570228, China

<sup>3</sup>Department of Chemistry, Faculty of Science National University of Singapore 3 Science Drive 3, Singapore 117543, Singapore

<sup>4</sup>These authors contributed equally: Aiping Yao, Changyan Zhu.

\*Corresponding author. Email: [suncy009@nenu.edu.cn](mailto:suncy009@nenu.edu.cn); [wangxl824@nenu.edu.cn](mailto:wangxl824@nenu.edu.cn); [chmjd@nus.edu.sg](mailto:chmjd@nus.edu.sg)

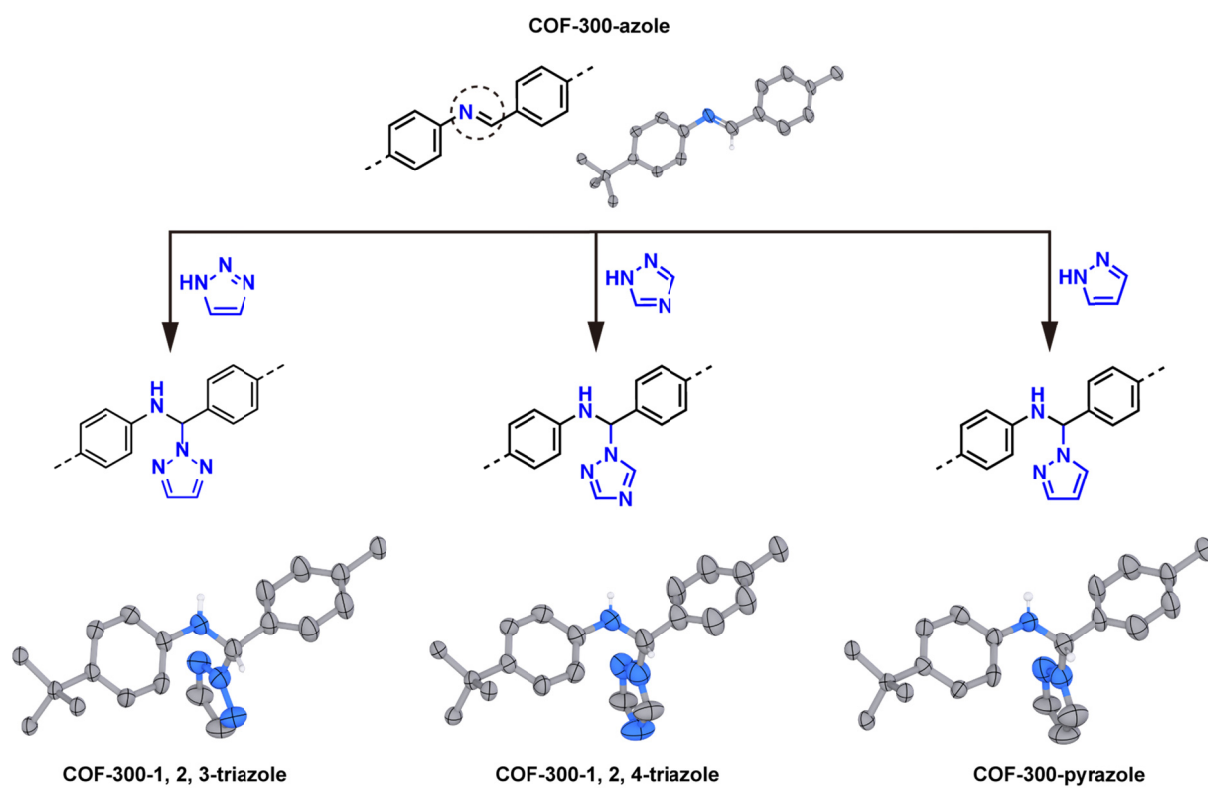

**Supplementary Fig. 1.** Crystal structures of COF-300-azole, including 1,2,3-triazole, 1,2,4-triazole, and pyrazole.

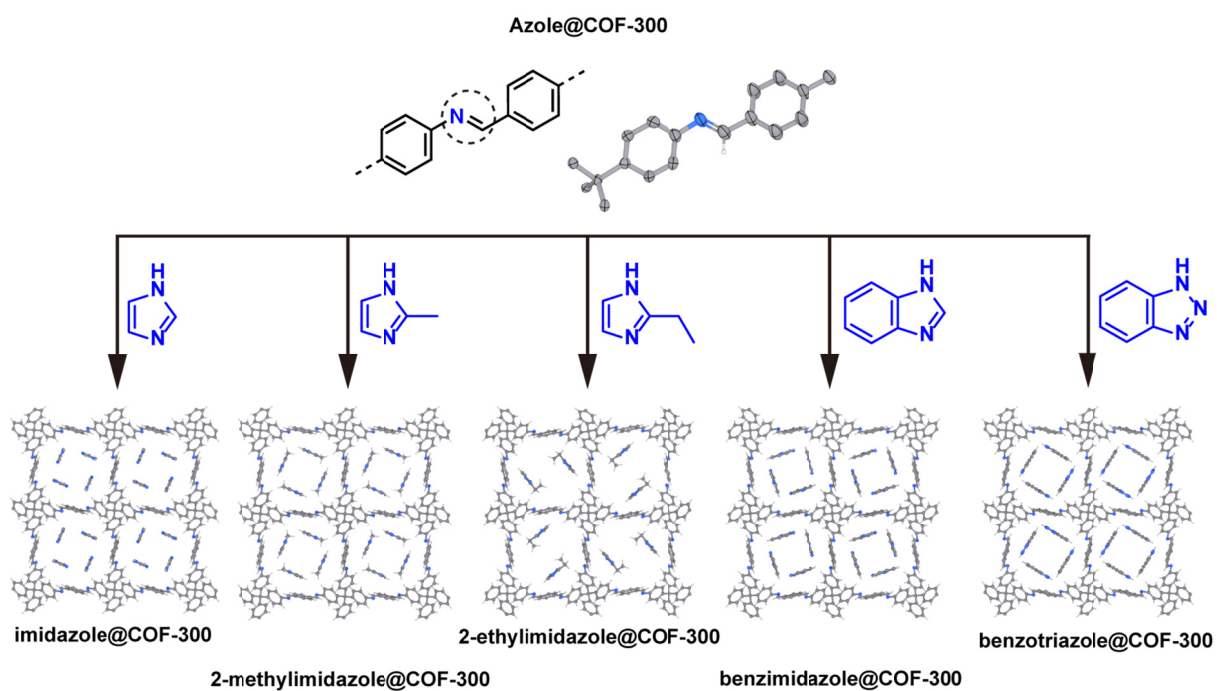

**Supplementary Fig. 2.** Crystal structures of azole@COF-300, including imidazole, 2-methylimidazole, 2-ethylimidazole, benzimidazole, and benzotriazole.

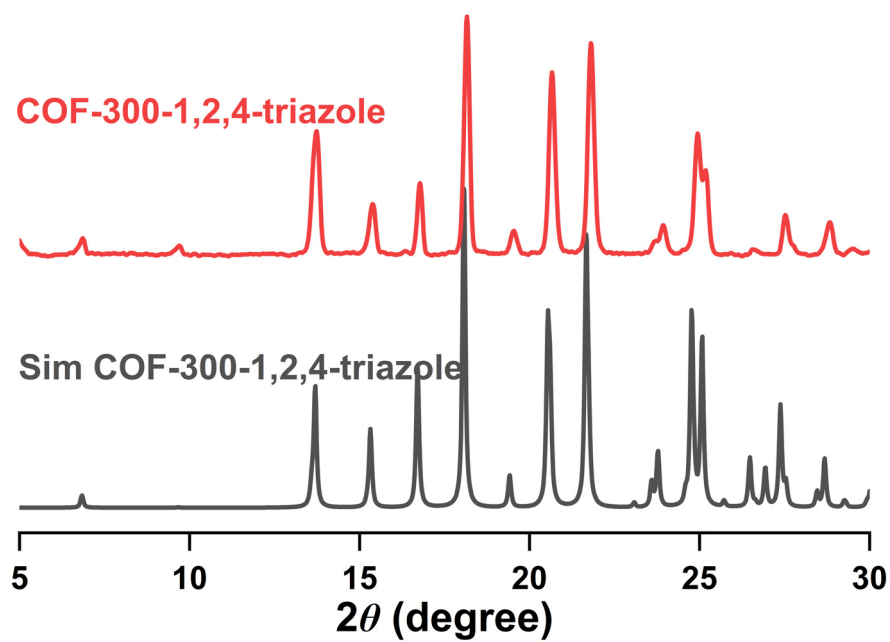

**Supplementary Fig. 3.** PXRD patterns for COF-300-1,2,4-triazole.



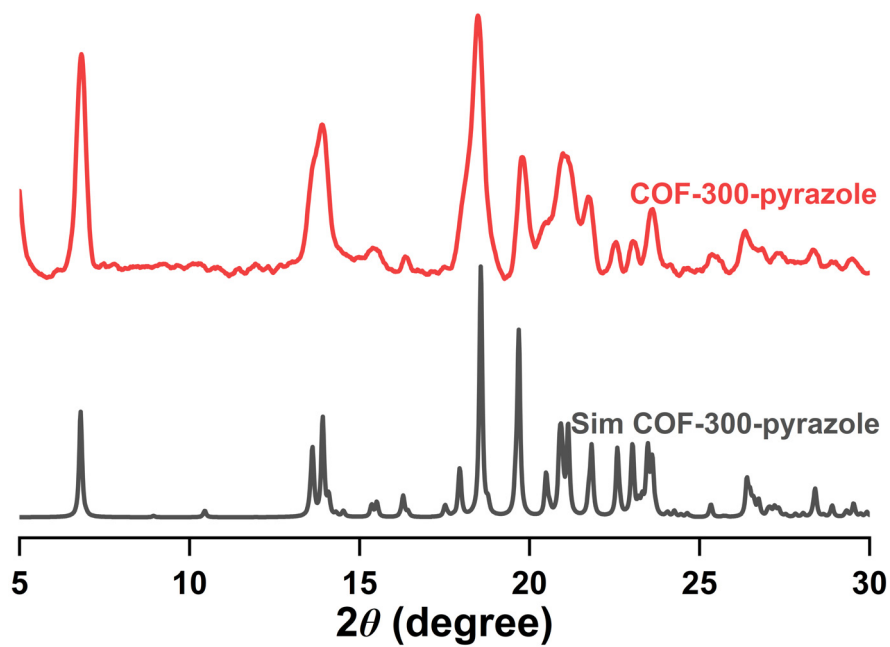

**Supplementary Fig. 4.** PXRD patterns for COF-300-pyrazole.

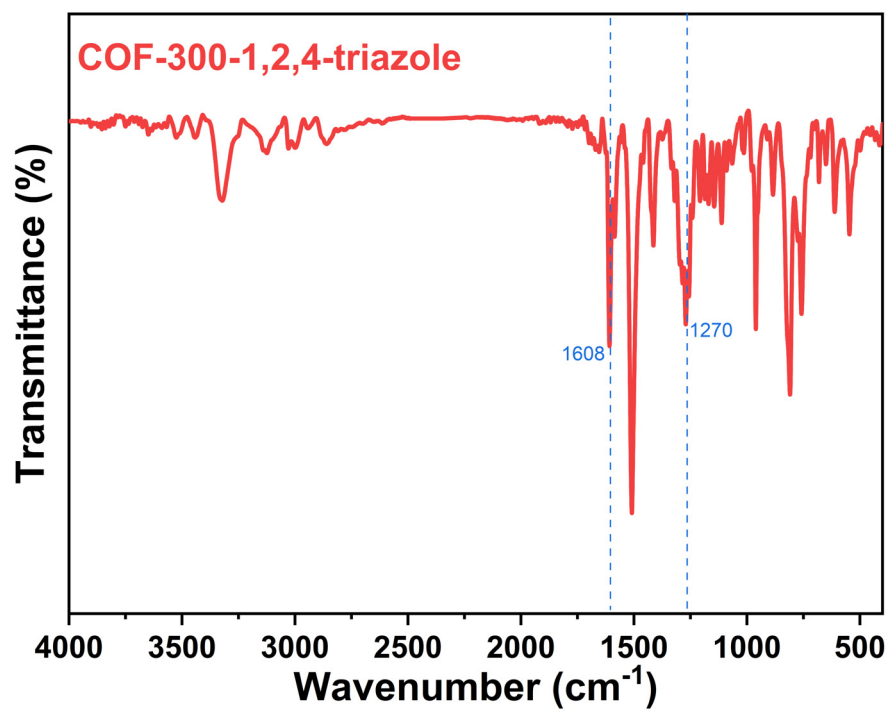

**Supplementary Fig. 5.** The FT-IR spectra of COF-300-1,2,4-triazole.

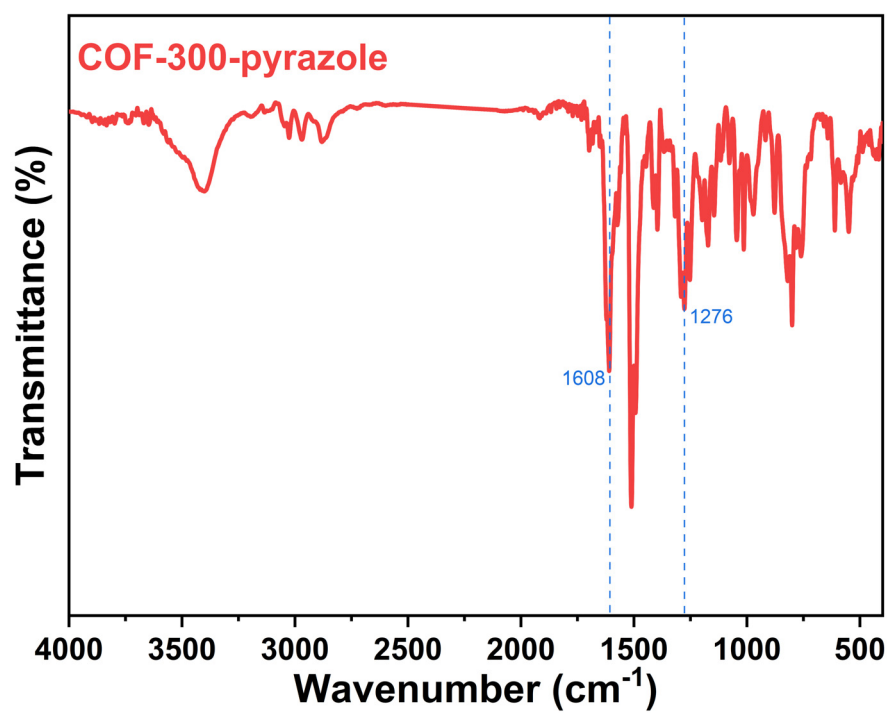

**Supplementary Fig. 6.** The FT-IR spectra of COF-300-pyrazole.

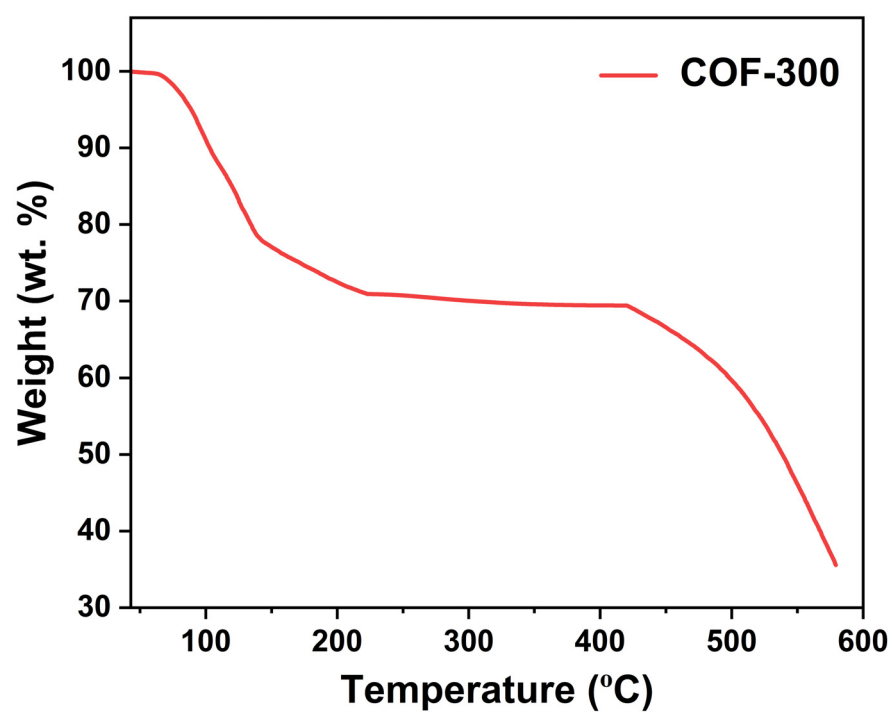

**Supplementary Fig. 7.** The TG curve of COF-300.

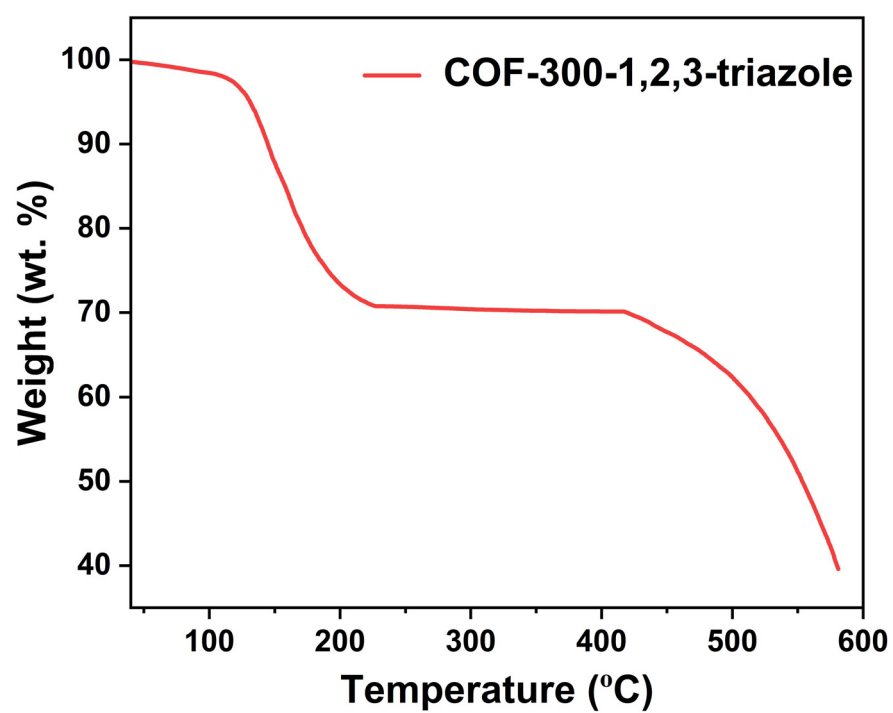

**Supplementary Fig. 8.** The TG curve of COF-300-1,2,3-triazole.

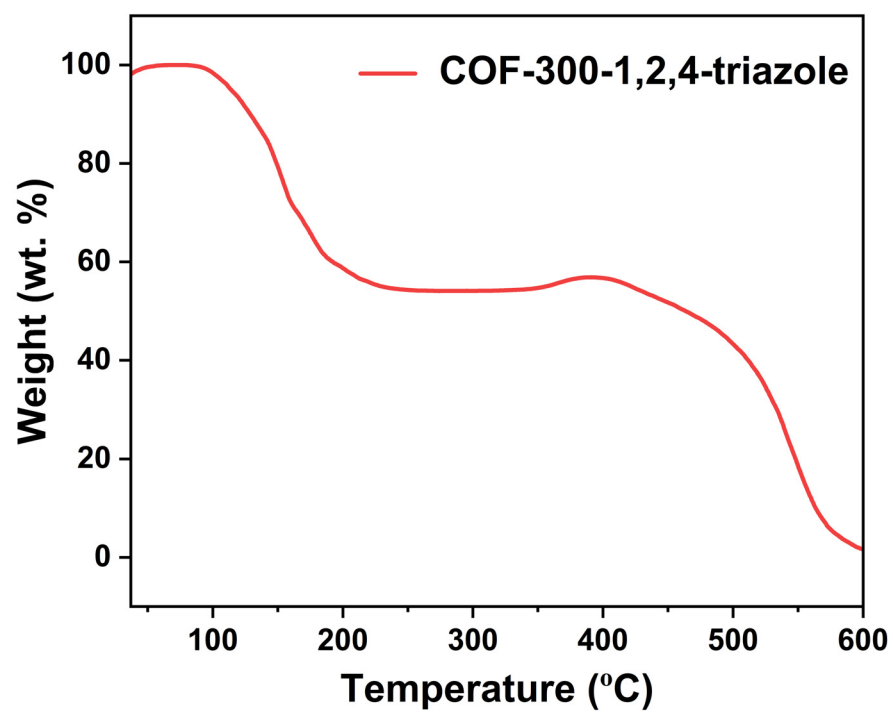

**Supplementary Fig. 9.** The TG curve of COF-300-1,2,4-triazole.

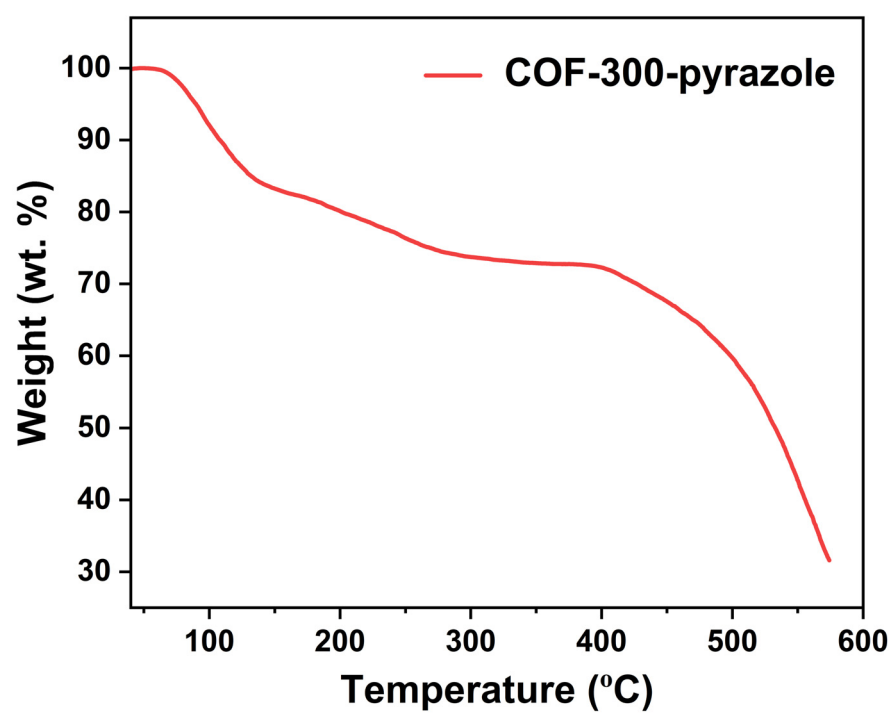

**Supplementary Fig. 10.** The TG curve of COF-300-pyrazole.

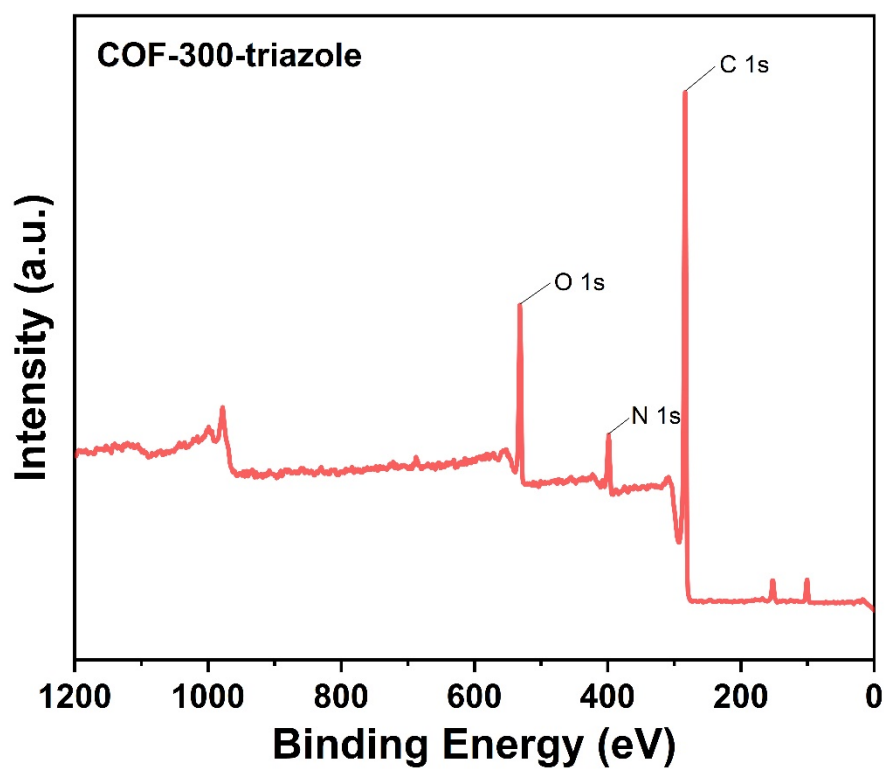

**Supplementary Fig. 11.** XPS spectra of COF-300-1,2,3-triazole.



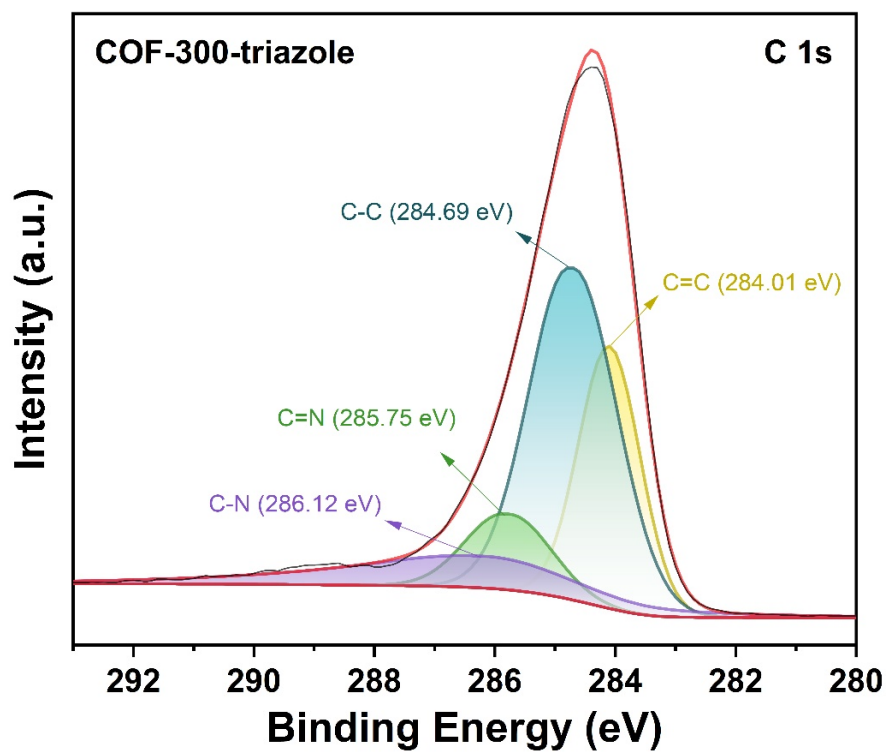

**Supplementary Fig. 12.** High-resolution XPS spectra of COF-300-1,2,3-triazole C 1s.

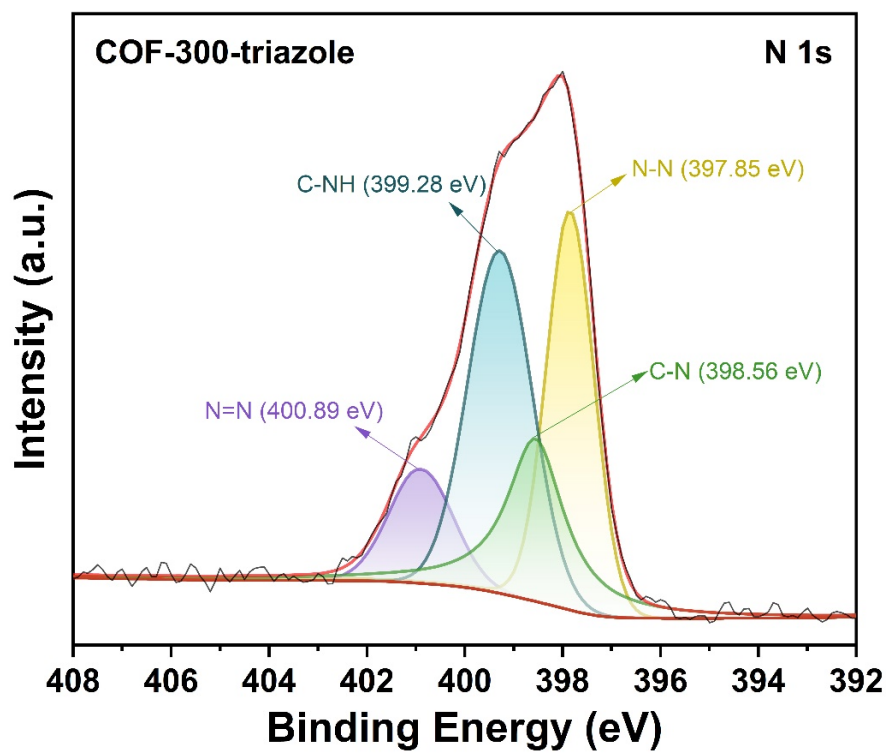

**Supplementary Fig. 13.** High-resolution XPS spectra of COF-300-1,2,3-triazole N 1s.

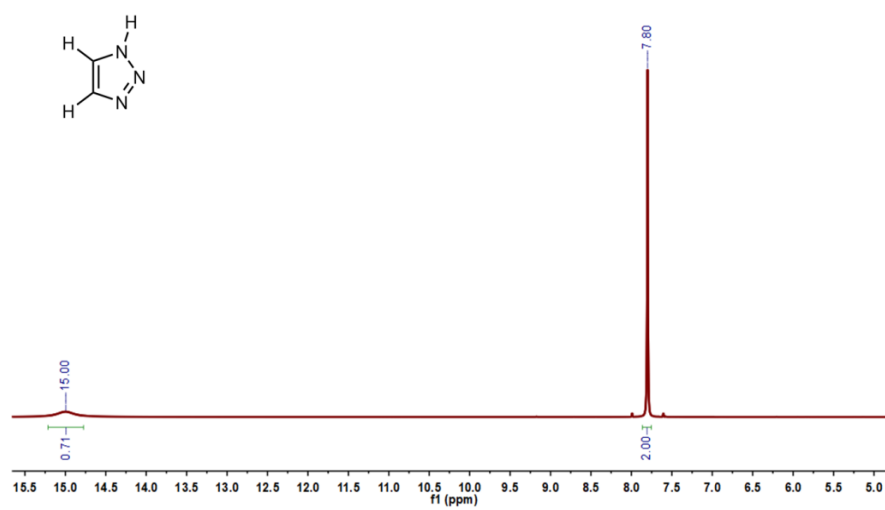

**Supplementary Fig. 14.** <sup>1</sup>H NMR spectrum (500 MHz, DMSO-d<sub>6</sub>) of 1H-1,2,3-triazole.

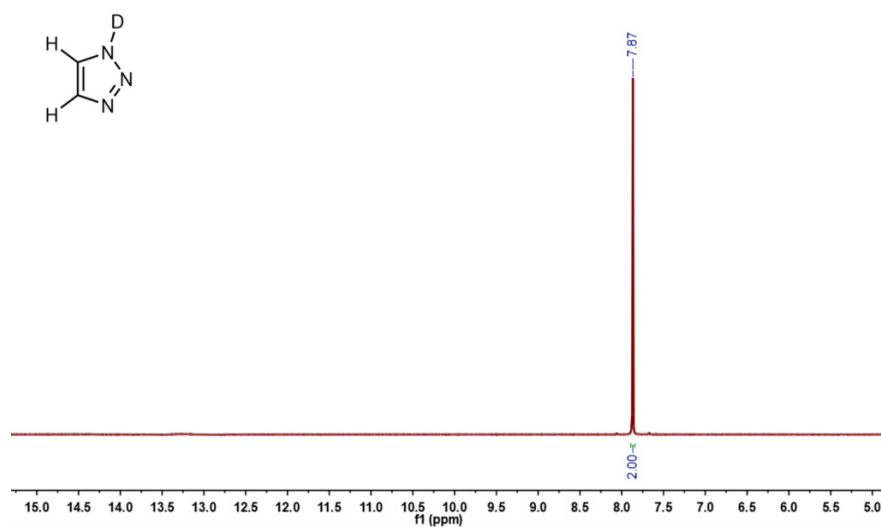

**Supplementary Fig. 15.** <sup>1</sup>H NMR spectrum (500 MHz, DMSO-d<sub>6</sub>) of 1D-1,2,3- deuterated triazole.

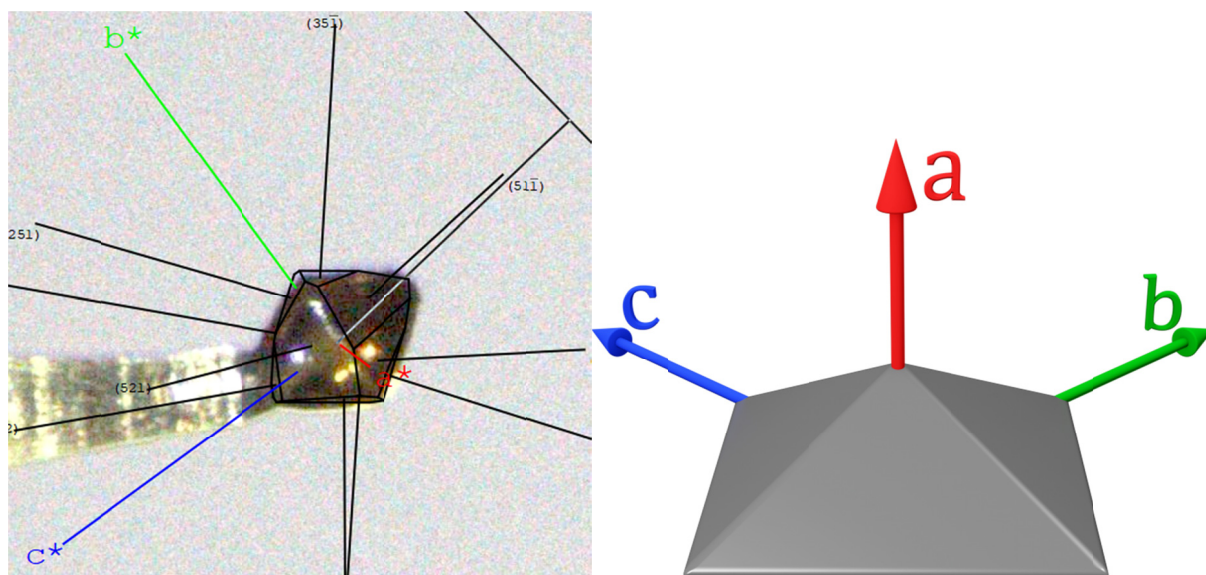

**Supplementary Fig. 16.** The indexed crystal faces of COF-300-1,2,3-triazole.

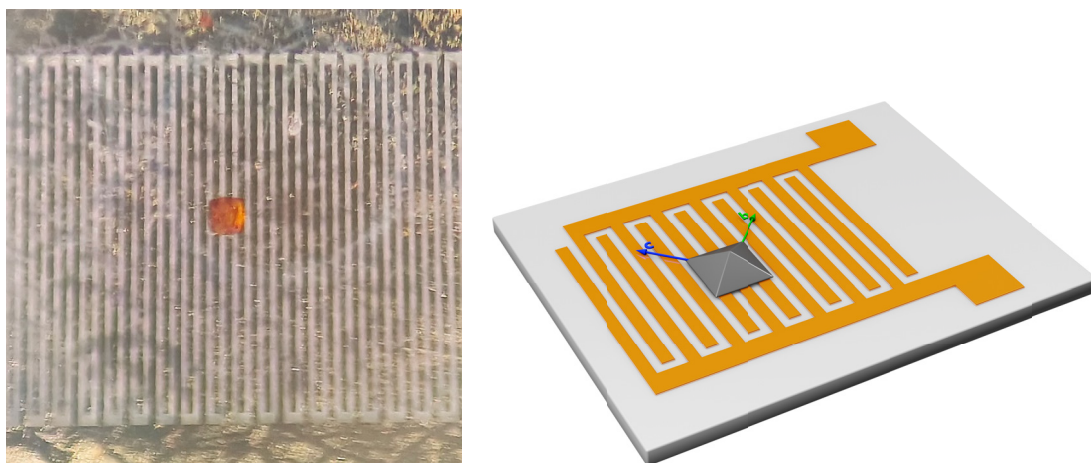

**Supplementary Fig. 17.** The photograph and illustration of single crystal placement on interdigital electrode.

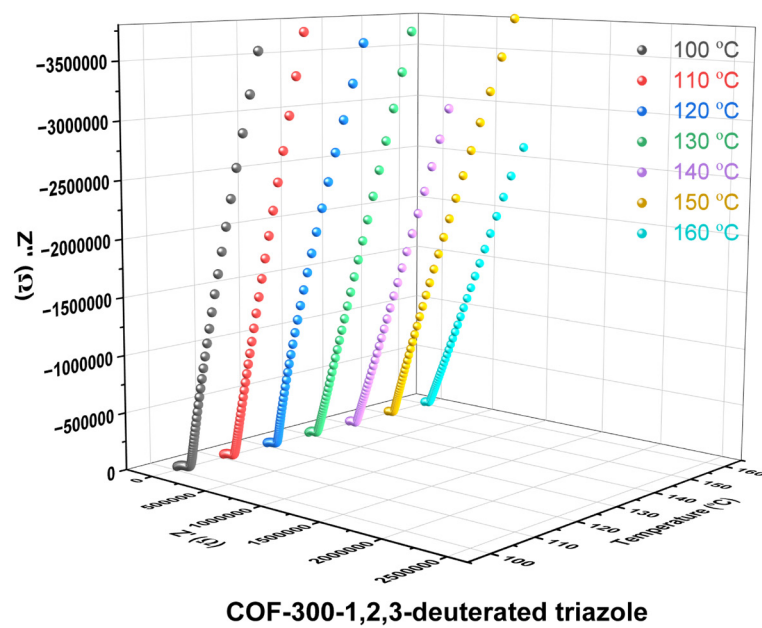

**Supplementary Fig. 18.** The proton conduction curve of COF-300-1,2,3-deuterated triazole at 100–160 °C.

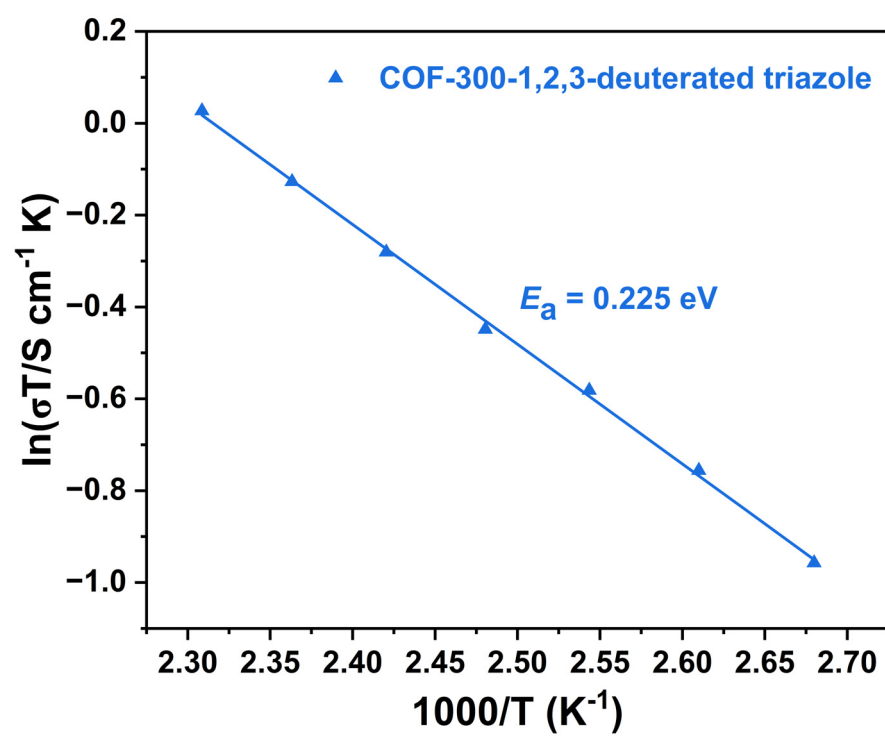

**Supplementary Fig. 19.** The  $E_a$  of COF-300-1,2,3-deuterated triazole at 100–160 °C.



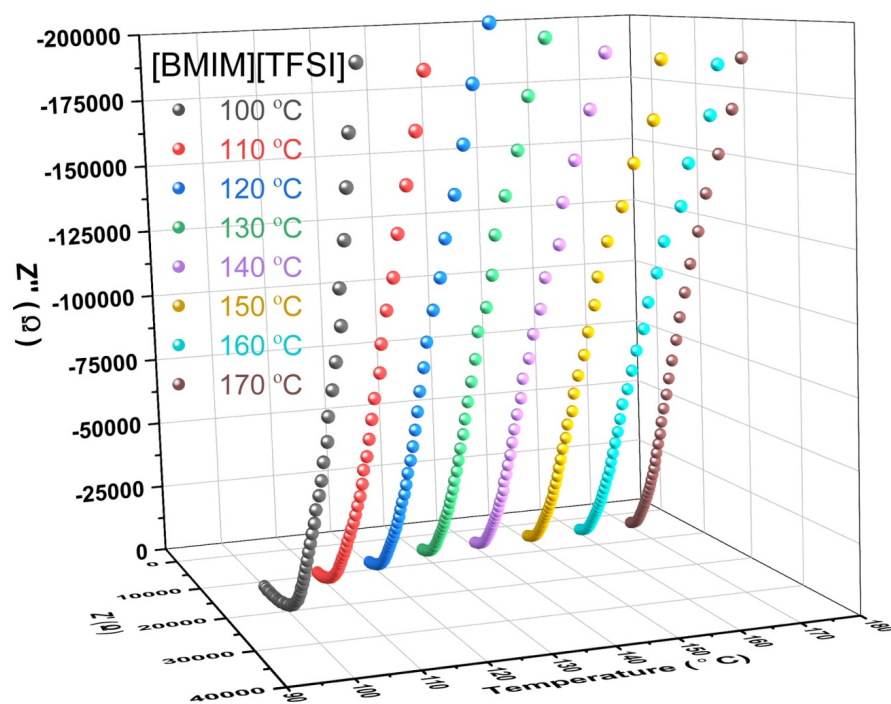

**Supplementary Fig. 20.** The proton conduction curve of [BMIM][TFSI] at 100–170 °C.

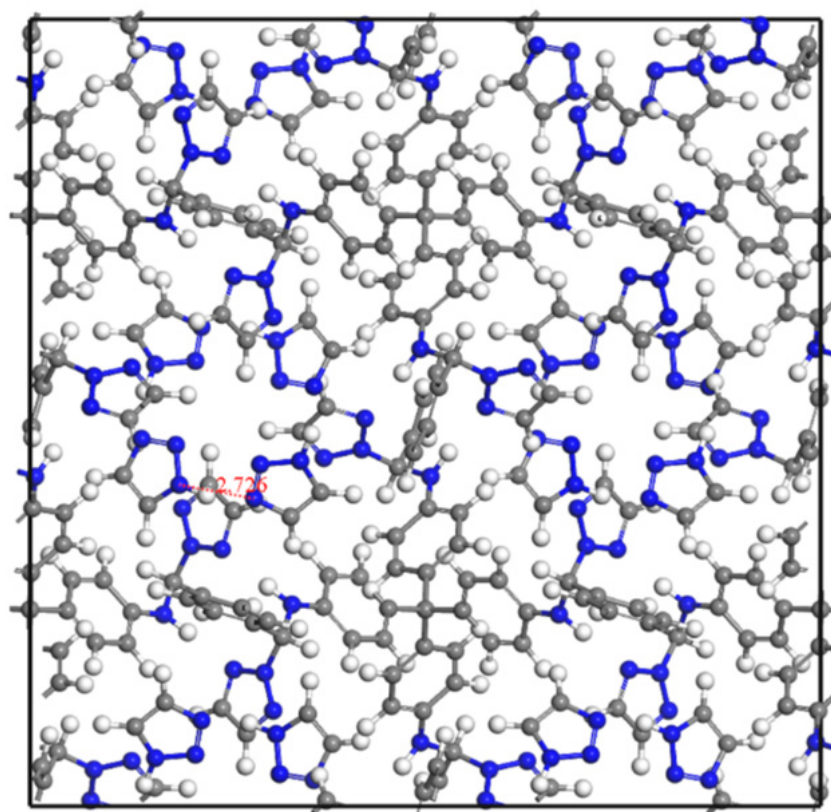

$$a = b = 25.98 \text{ \AA}$$

$$c = 7.78 \text{ \AA}$$

**Supplementary Fig. 21.** Top view of the optimized geometric structure of COF-300-1,2,3-triazole. The optimized N–H···N H-bond length in COF-300-triazole is inserted. The optimized lattice constants is also presented.

**Supplementary Table 1.** Anhydrous single crystal proton conductivity of COF-300-1,2,3-triazole at 100–170 °C.

| Material               | Temperature (°C) | Proton conductivities (S cm <sup>-1</sup> ) |
|------------------------|------------------|---------------------------------------------|
| COF-300-1,2,3-triazole | 100              | 0.002189597                                 |
|                        | 110              | 0.002728048                                 |
|                        | 120              | 0.003042542                                 |
|                        | 130              | 0.003232167                                 |
|                        | 140              | 0.003277614                                 |
|                        | 150              | 0.003610336                                 |
|                        | 160              | 0.003880594                                 |
|                        | 170              | 0.004231058                                 |

**Supplementary Table 2.** Anhydrous single crystal proton conductivity of COF-300-1,2,4-triazole at 100–170 °C.

| Material               | Temperature (°C) | Proton conductivities (S cm <sup>-1</sup> ) |
|------------------------|------------------|---------------------------------------------|
| COF-1,2,4-300-triazole | 100              | 0.002026712                                 |
|                        | 110              | 0.002269504                                 |
|                        | 120              | 0.002489792                                 |
|                        | 130              | 0.003286258                                 |
|                        | 140              | 0.003425127                                 |
|                        | 150              | 0.003625257                                 |
|                        | 160              | 0.003874167                                 |
|                        | 170              | 0.004146453                                 |

**Supplementary Table 3.** Anhydrous single crystal proton conductivity of COF-300-pyrazole at 100–170 °C.

| Material          | Temperature (°C) | Proton conductivities (S cm <sup>-1</sup> ) |
|-------------------|------------------|---------------------------------------------|
| COF-300- pyrazole | 100              | 0.002414759                                 |
|                   | 110              | 0.002778357                                 |
|                   | 120              | 0.00308043                                  |
|                   | 130              | 0.00321231                                  |
|                   | 140              | 0.00358915                                  |
|                   | 150              | 0.003882289                                 |
|                   | 160              | 0.004236705                                 |
|                   | 170              | 0.004349906                                 |

**Supplementary Table 4.** Anhydrous single crystal proton conductivity of COF-300-1,2,3-deuterated triazole at 100–160 °C.

| Material                     | Temperature (°C) | Proton conductivities (S cm <sup>-1</sup> ) |
|------------------------------|------------------|---------------------------------------------|
| COF-300- deuterated triazole | 100              | 0.001028807                                 |
|                              | 110              | 0.001225716                                 |
|                              | 120              | 0.001422131                                 |
|                              | 130              | 0.001583832                                 |
|                              | 140              | 0.001828488                                 |
|                              | 150              | 0.002081512                                 |
|                              | 160              | 0.002371593                                 |

**Supplementary Table 5.** Anhydrous proton conductivity of [BMIM][TFSI] at 100–170 °C.

| Material     | Temperature (°C) | Proton conductivities (S cm <sup>-1</sup> ) |
|--------------|------------------|---------------------------------------------|
| [BMIM][TFSI] | 100              | 0.008660258                                 |
|              | 110              | 0.012381218                                 |
|              | 120              | 0.016587874                                 |
|              | 130              | 0.018909847                                 |
|              | 140              | 0.021197668                                 |
|              | 150              | 0.02281152                                  |
|              | 160              | 0.024573043                                 |
|              | 170              | 0.026576307                                 |

**Supplementary Table 6.** Comparison of proton conductivities of reported single-crystal proton-conducting materials under anhydrous conditions.

| No. | Material                                                                                                 | $\sigma$ (S cm <sup>-1</sup> )          | T (°C)     | $E_a$ (eV)   | Ref.             |
|-----|----------------------------------------------------------------------------------------------------------|-----------------------------------------|------------|--------------|------------------|
| 1   | Li <sub>3</sub> HMO <sub>8</sub> W·18H <sub>2</sub> O                                                    | $3.8 \times 10^{-7}$                    | 20         | 0.62         | (1)              |
| 2   | C <sub>12</sub> im-V <sub>10</sub>                                                                       | $4.6 \times 10^{-5}$                    | 100        | Not provided | (2)              |
| 3   | H <sub>3</sub> PO <sub>4</sub> @USTB-5o                                                                  | $6.3 \times 10^{-2}$                    | 140        | 0.20         | (3)              |
| 4   | [Eu <sub>2</sub> (CO <sub>3</sub> )(ox) <sub>2</sub> (H <sub>2</sub> O) <sub>2</sub> ]·4H <sub>2</sub> O | $2.08 \times 10^{-3}$                   | 150        | 0.28         | (4)              |
| 5   | [Co <sub>2</sub> Na(bptc) <sub>2</sub> ][EMIm] <sub>3</sub>                                              | $2.63 \times 10^{-5}$                   | 25         | 0.49         | (5)              |
| 6   | (Me <sub>2</sub> NH <sub>2</sub> )[Eu(L)]                                                                | $1.25 \times 10^{-3}$                   | 150        | 0.21         | (6)              |
| 7   | [Zn(H <sub>2</sub> PO <sub>4</sub> ) <sub>2</sub> (TzH) <sub>2</sub> ] <sub>n</sub>                      | $1.1 \times 10^{-4}$                    | 130        | Not provided | (7)              |
| 8   | [Fe(ox)(H <sub>2</sub> O) <sub>2</sub> ]                                                                 | $1.5 \times 10^{-3}$                    | 20         | 0.14         | (8)              |
| 9   | Im-Glu                                                                                                   | $2.40 \times 10^{-6}$                   | 94         | 0.90         | (9)              |
| 10  | Fe(H <sub>2</sub> PO <sub>4</sub> ) <sub>2</sub> F                                                       | $2.6 \times 10^{-7}$                    | 25         | 0.43         | (10)             |
| 11  | Ba(H <sub>2</sub> PO <sub>4</sub> ) <sub>2</sub>                                                         | $2 \times 10^{-7}$                      | 160        | 0.80         | (11)             |
|     | <b>COF-300-123-triazole</b>                                                                              | <b><math>4.23 \times 10^{-3}</math></b> | <b>170</b> | <b>0.153</b> | <b>This work</b> |
|     | <b>COF-300-124-triazole</b>                                                                              | <b><math>4.15 \times 10^{-3}</math></b> | <b>170</b> | <b>0.187</b> | <b>This work</b> |
|     | <b>COF-300-pyrazole</b>                                                                                  | <b><math>4.35 \times 10^{-3}</math></b> | <b>170</b> | <b>0.155</b> | <b>This work</b> |



**COF-300:** A pyramidal-shaped crystal of COF-300 was coated with silicone oil and mounted on a 0.050 mm diameter loop. The crystal data was measured on the single-crystal X-ray diffractometer. All the non-hydrogen atoms of the framework were refined anisotropically. Hydrogen atoms were included at the geometrically calculated positions and refined using a riding model.

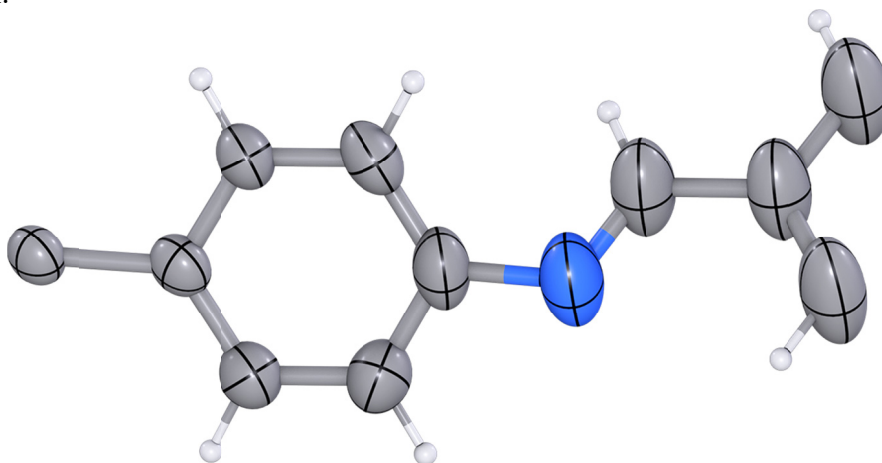

**Supplementary Fig. 22.** Asymmetric unit in the single crystal structure of COF-300.

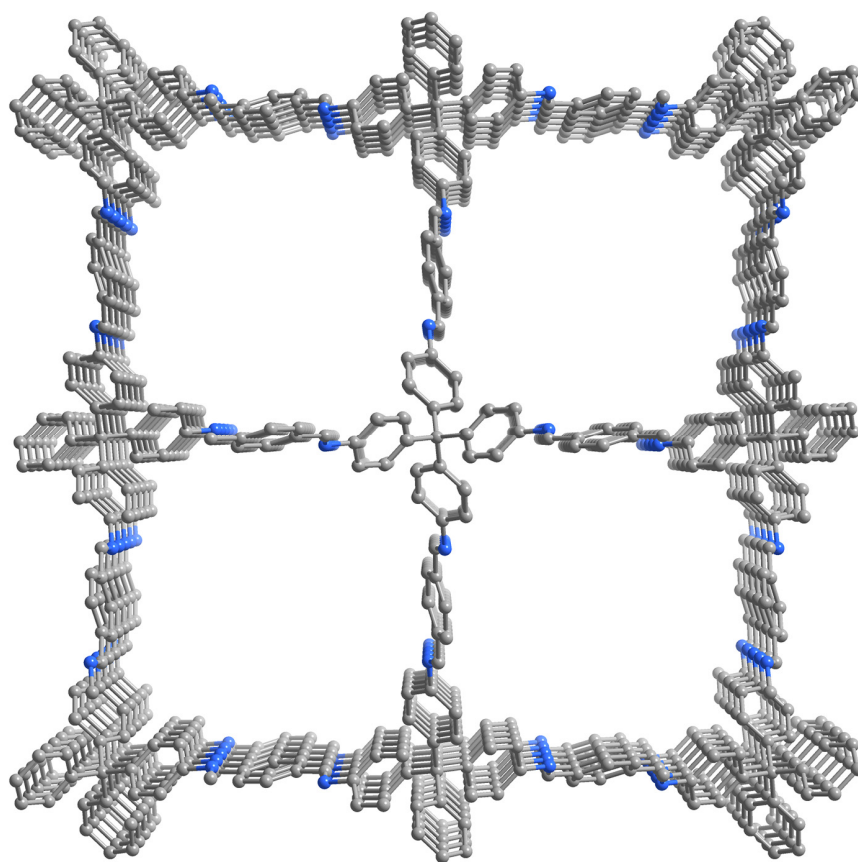

**Supplementary Fig. 23.** Single-crystal structure of COF-300 viewed along c-axis. C atoms, gray; N atoms, blue. H atoms were omitted for clarity.

**Supplementary Table 7.** Crystallographic data and structural refinement parameters for COF-300.

| Name                                      | COF-300                                                     |
|-------------------------------------------|-------------------------------------------------------------|
| Empirical formula                         | C <sub>41</sub> H <sub>28</sub> N <sub>4</sub>              |
| Formula weight                            | 576.67                                                      |
| Temperature [K]                           | 173.00                                                      |
| Crystal system                            | tetragonal                                                  |
| Space group (number)                      | <i>I</i> 4 <sub>1</sub> /a                                  |
| <i>a</i> [Å]                              | 26.9202(13)                                                 |
| <i>b</i> [Å]                              | 26.9202(13)                                                 |
| <i>c</i> [Å]                              | 7.4244(5)                                                   |
| $\alpha$ [°]                              | 90                                                          |
| $\beta$ [°]                               | 90                                                          |
| $\gamma$ [°]                              | 90                                                          |
| Volume [Å <sup>3</sup> ]                  | 5380.4(6)                                                   |
| <i>Z</i>                                  | 4                                                           |
| $\rho_{\text{calc}}$ [gcm <sup>-3</sup> ] | 0.712                                                       |
| $\mu$ [mm <sup>-1</sup> ]                 | 0.327                                                       |
| <i>F</i> (000)                            | 1208.0                                                      |
| Crystal size [mm <sup>3</sup> ]           | 0.15 × 0.15 × 0.1                                           |
| Radiation                                 | CuK $\alpha$ ( $\lambda$ = 1.54178)                         |
| 2 $\theta$ range [°]                      | 9.292 to 129.084                                            |
| Index ranges                              | -30 ≤ <i>h</i> ≤ 31, -24 ≤ <i>k</i> ≤ 31, -8 ≤ <i>l</i> ≤ 8 |
| Reflections collected                     | 14925                                                       |
| Independent reflections                   | 2196                                                        |
|                                           | $R_{\text{int}} = 0.0497$ , $R_{\text{sigma}} = 0.0331$     |
| Data / Restraints / Parameters            | 2196/0/102                                                  |
| Goodness-of-fit on $F^2$                  | 1.085                                                       |
| Final <i>R</i> indexes                    | $R_1 = 0.0661$                                              |
| [ $I \geq 2\sigma(I)$ ]                   | $wR_2 = 0.2126$                                             |
| Final <i>R</i> indexes                    | $R_1 = 0.0829$                                              |
| [all data]                                | $wR_2 = 0.2272$                                             |
| Largest peak/hole [eÅ <sup>-3</sup> ]     | 0.18/-0.17                                                  |
| CCDC number                               | 2375338                                                     |

**COF-300-1,2,3-triazole:** A pyramidal -shaped crystal of COF-300-1,2,3-triazole was coated with silicone oil and mounted on a 0.050 mm diameter loop. The crystal data was measured on the single-crystal X-ray diffractometer. All the non-hydrogen atoms of the framework were refined anisotropically. Hydrogen atoms were included at the geometrically calculated positions and refined using a riding model.

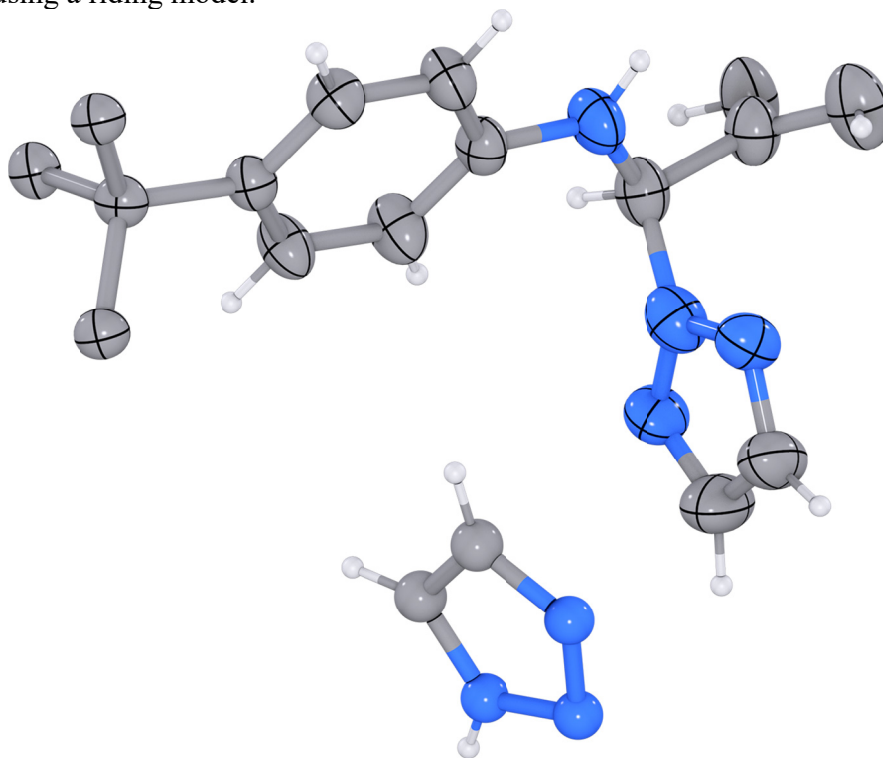

**Supplementary Fig. 24.** Asymmetric unit in the single-crystal structure of COF-300-1,2,3-triazole.

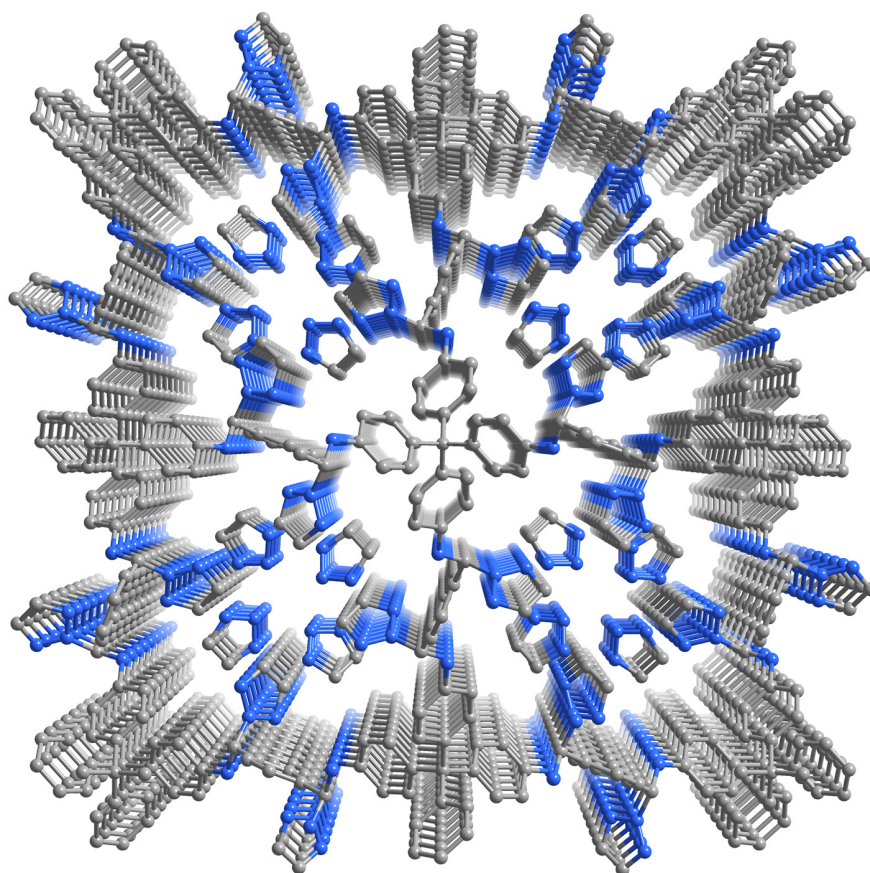

**Supplementary Fig. 25.** Single-crystal structure of COF-300-1,2,3-triazole viewed along c-axis. C atoms, gray; N atoms, blue. H atoms were omitted for clarity.

**Supplementary Table 8.** Crystallographic data and structural refinement parameters for COF-300-1,2,3-triazole.

| Name                                      | COF-300-1,2,3-triazole                                      |
|-------------------------------------------|-------------------------------------------------------------|
| Empirical formula                         | C <sub>57</sub> H <sub>52</sub> N <sub>28</sub>             |
| Formula weight                            | 1129.26                                                     |
| Temperature [K]                           | 293.00                                                      |
| Crystal system                            | tetragonal                                                  |
| Space group (number)                      | <i>I</i> 4 <sub>1</sub> /a                                  |
| <i>a</i> [Å]                              | 26.0064(13)                                                 |
| <i>b</i> [Å]                              | 26.0064(13)                                                 |
| <i>c</i> [Å]                              | 7.7568(7)                                                   |
| $\alpha$ [°]                              | 90                                                          |
| $\beta$ [°]                               | 90                                                          |
| $\gamma$ [°]                              | 90                                                          |
| Volume [Å <sup>3</sup> ]                  | 5246.2(7)                                                   |
| <i>Z</i>                                  | 4                                                           |
| $\rho_{\text{calc}}$ [gcm <sup>-3</sup> ] | 1.430                                                       |
| $\mu$ [mm <sup>-1</sup> ]                 | 0.763                                                       |
| <i>F</i> (000)                            | 2360.0                                                      |
| Crystal size [mm <sup>3</sup> ]           | 0.2 × 0.15 × 0.13                                           |
| Radiation                                 | Cu <i>K</i> α ( $\lambda$ = 1.54178 Å)                      |
| 2 $\theta$ range [°]                      | 6.798 to 128.11                                             |
| Index ranges                              | -25 ≤ <i>h</i> ≤ 23, -28 ≤ <i>k</i> ≤ 30, -8 ≤ <i>l</i> ≤ 9 |
| Reflections collected                     | 13269                                                       |
| Independent reflections                   | 2139                                                        |
|                                           | $R_{\text{int}} = 0.0539$ , $R_{\text{sigma}} = 0.0358$     |
| Data / Restraints / Parameters            | 2139/97/185                                                 |
| Goodness-of-fit on $F^2$                  | 1.102                                                       |
| Final <i>R</i> indexes                    | $R_1 = 0.0855$                                              |
| [ $I \geq 2\sigma(I)$ ]                   | $wR_2 = 0.2411$                                             |
| Final <i>R</i> indexes                    | $R_1 = 0.0993$                                              |
| [all data]                                | $wR_2 = 0.2559$                                             |
| Largest peak/hole [eÅ <sup>-3</sup> ]     | 0.35/-0.38                                                  |
| CCDC number                               | 2418811                                                     |

**COF-300-1,2,4-triazole:** A pyramidal-shaped crystal of COF-300-1,2,4-triazole was coated with silicone oil and mounted on a 0.050 mm diameter loop. The crystal data was measured on the single-crystal X-ray diffractometer. All the non-hydrogen atoms of the framework were refined anisotropically. Hydrogen atoms were included at the geometrically calculated positions and refined using a riding model.

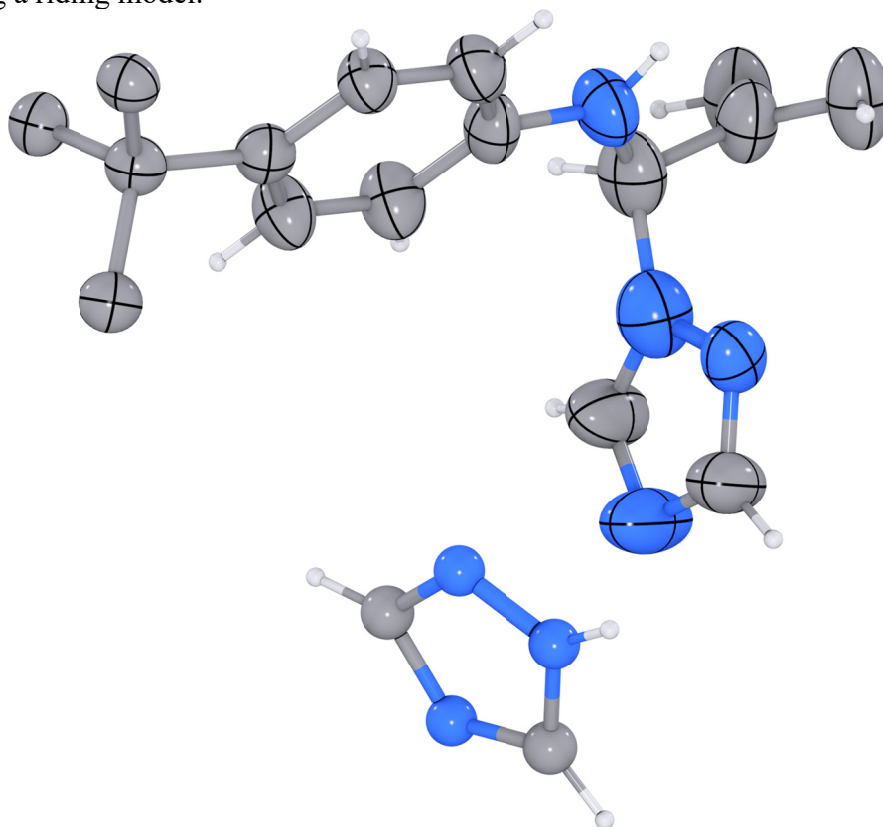

**Supplementary Fig. 26.** Asymmetric unit in the single crystal structure of COF-300-1,2,4-triazole.

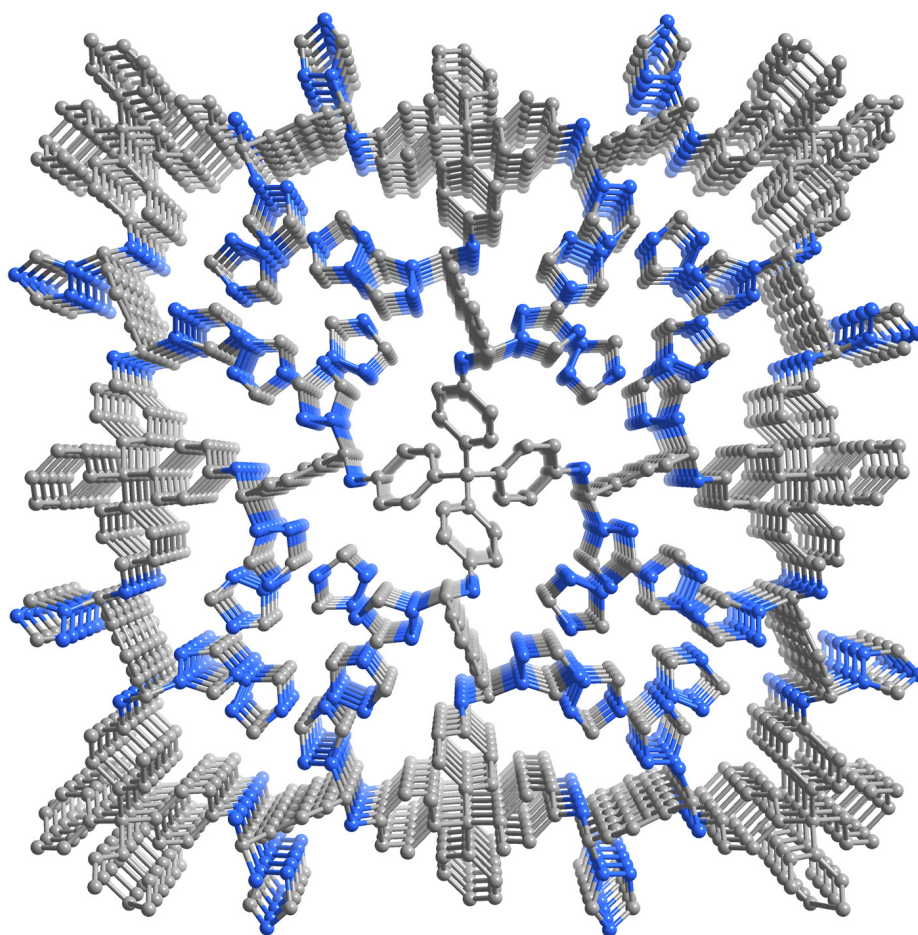

**Supplementary Fig. 27.** Single-crystal structure of COF-300-1,2,4-triazole viewed along c-axis. C atoms, gray; N atoms, blue. H atoms were omitted for clarity.



**Supplementary Table 9.** Crystallographic data and structural refinement parameters for COF-300-1,2,4-triazole.

| Name                                      | COF-300-1,2,4-triazole                                               |
|-------------------------------------------|----------------------------------------------------------------------|
| Empirical formula                         | C <sub>57</sub> H <sub>52</sub> N <sub>28</sub>                      |
| Formula weight                            | 1129.26                                                              |
| Temperature [K]                           | 173.00                                                               |
| Crystal system                            | tetragonal                                                           |
| Space group (number)                      | <i>I</i> 4 <sub>1</sub> /a                                           |
| <i>a</i> [Å]                              | 25.844(9)                                                            |
| <i>b</i> [Å]                              | 25.844(9)                                                            |
| <i>c</i> [Å]                              | 7.879(6)                                                             |
| $\alpha$ [°]                              | 90                                                                   |
| $\beta$ [°]                               | 90                                                                   |
| $\gamma$ [°]                              | 90                                                                   |
| Volume [Å <sup>3</sup> ]                  | 5263(6)                                                              |
| <i>Z</i>                                  | 4                                                                    |
| $\rho_{\text{calc}}$ [gcm <sup>-3</sup> ] | 1.425                                                                |
| $\mu$ [mm <sup>-1</sup> ]                 | 0.760                                                                |
| <i>F</i> (000)                            | 2360.0                                                               |
| Crystal size [mm <sup>3</sup> ]           | 0.2 × 0.15 × 0.13                                                    |
| Radiation                                 | CuK $\alpha$ ( $\lambda$ = 1.54178)                                  |
| 2 $\theta$ range [°]                      | 9.68 to 99.44                                                        |
| Index ranges                              | -25 ≤ <i>h</i> ≤ 24, -25 ≤ <i>k</i> ≤ 20, -7 ≤ <i>l</i> ≤ 7          |
| Reflections collected                     | 7182                                                                 |
| Independent reflections                   | 1330                                                                 |
|                                           | <i>R</i> <sub>int</sub> = 0.0728, <i>R</i> <sub>sigma</sub> = 0.0509 |
| Data / Restraints / Parameters            | 1330/108/193                                                         |
| Goodness-of-fit on <i>F</i> <sup>2</sup>  | 1.063                                                                |
| Final <i>R</i> indexes                    | <i>R</i> <sub>1</sub> = 0.1121                                       |
| [ <i>I</i> ≥ 2 $\sigma$ ( <i>I</i> )]     | w <i>R</i> <sub>2</sub> = 0.3108                                     |
| Final <i>R</i> indexes                    | <i>R</i> <sub>1</sub> = 0.1299                                       |
| [all data]                                | w <i>R</i> <sub>2</sub> = 0.3318                                     |
| Largest peak/hole [eÅ <sup>-3</sup> ]     | 0.36/-0.36                                                           |
| CCDC number                               | 2468192                                                              |

**COF-300-pyrazole:** A pyramidal-shaped crystal of COF-300-pyrazole was coated with silicone oil and mounted on a 0.050 mm diameter loop. The crystal data was measured on the single-crystal X-ray diffractometer. All the non-hydrogen atoms of the framework were refined anisotropically. Hydrogen atoms were included at the geometrically calculated positions and refined using a riding model.

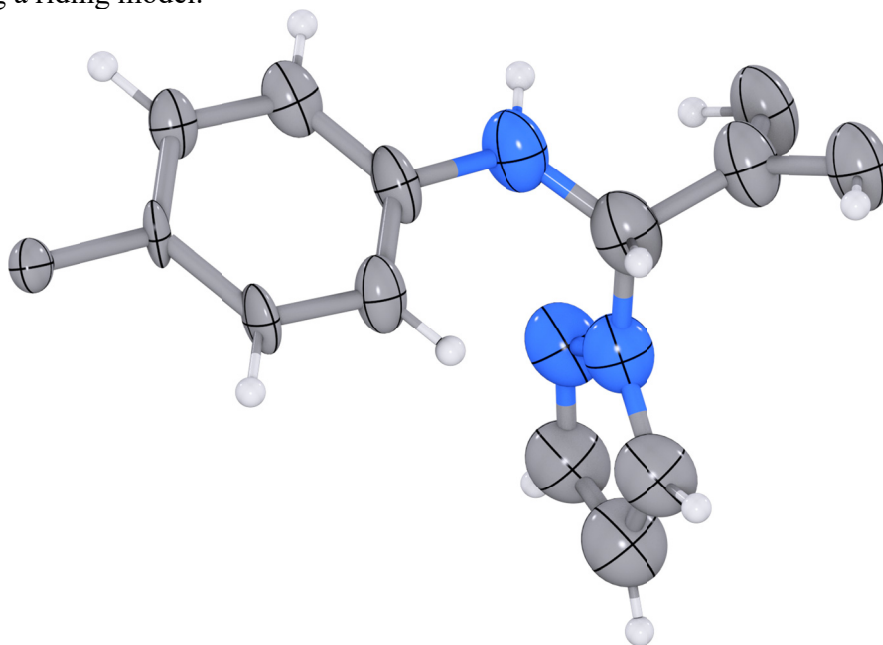

**Supplementary Fig. 28.** Asymmetric unit in the single crystal structure of COF-300-pyrazole.

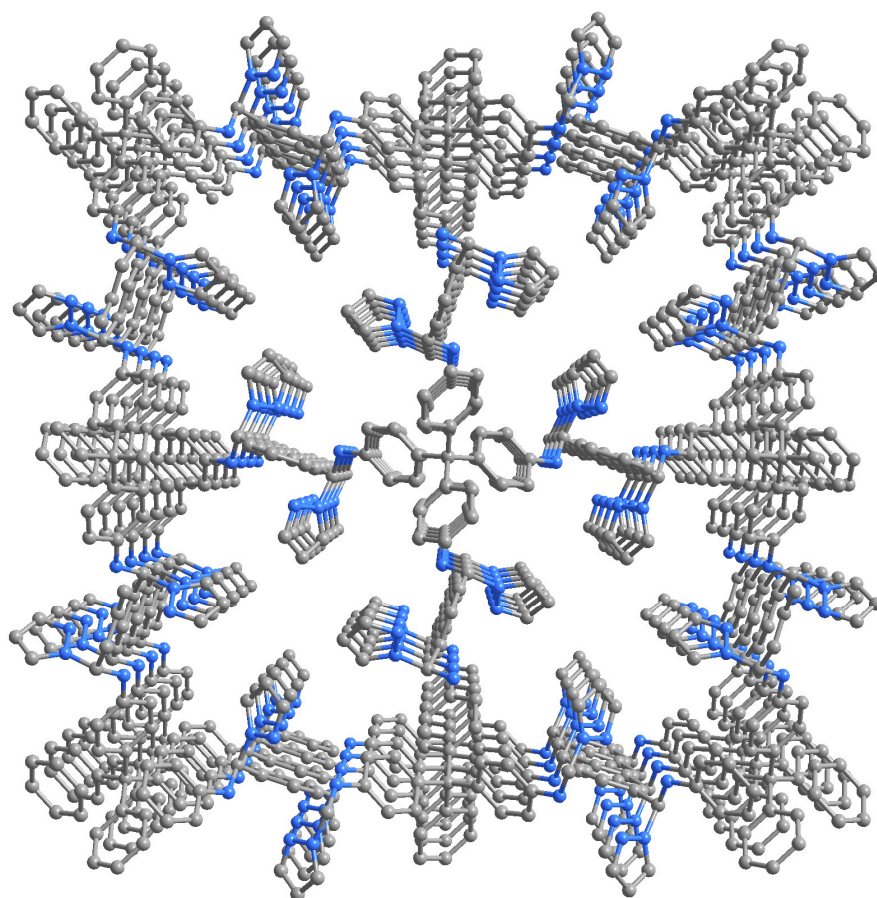

**Supplementary Fig. 29.** Single-crystal structure of COF-300-pyrazole viewed along c-axis. C atoms, gray; N atoms, blue. H atoms were omitted for clarity.

**Supplementary Table 10.** Crystallographic data and structural refinement parameters for COF-300-pyrazole.

| Name                                      | COF-300-pyrazole                                           |
|-------------------------------------------|------------------------------------------------------------|
| Empirical formula                         | C <sub>65</sub> H <sub>60</sub> N <sub>20</sub>            |
| Formula weight                            | 1121.33                                                    |
| Temperature [K]                           | 293.02                                                     |
| Crystal system                            | tetragonal                                                 |
| Space group (number)                      | <i>I</i> 4 <sub>1</sub> /a                                 |
| <i>a</i> [Å]                              | 25.946(3)                                                  |
| <i>b</i> [Å]                              | 25.946(3)                                                  |
| <i>c</i> [Å]                              | 7.6916(14)                                                 |
| $\alpha$ [°]                              | 90                                                         |
| $\beta$ [°]                               | 90                                                         |
| $\gamma$ [°]                              | 90                                                         |
| Volume [Å <sup>3</sup> ]                  | 5178.1(14)                                                 |
| <i>Z</i>                                  | 4                                                          |
| $\rho_{\text{calc}}$ [gcm <sup>-3</sup> ] | 1.438                                                      |
| $\mu$ [mm <sup>-1</sup> ]                 | 0.722                                                      |
| <i>F</i> (000)                            | 2360.0                                                     |
| Crystal size [mm <sup>3</sup> ]           | 0.2 × 0.15 × 0.13                                          |
| Radiation                                 | CuK $\alpha$ ( $\lambda$ = 1.54178)                        |
| 2 $\theta$ range [°]                      | 9.642 to 86.872                                            |
| Index ranges                              | -23 ≤ <i>h</i> ≤ 19, -22 ≤ <i>k</i> ≤ 9, -6 ≤ <i>l</i> ≤ 6 |
| Reflections collected                     | 4044                                                       |
| Independent reflections                   | 939                                                        |
|                                           | $R_{\text{int}} = 0.0764$ , $R_{\text{sigma}} = 0.0737$    |
| Data / Restraints / Parameters            | 939/399/127                                                |
| Goodness-of-fit on $F^2$                  | 1.039                                                      |
| Final <i>R</i> indexes                    | $R_1 = 0.2502$                                             |
| [ $I \geq 2\sigma(I)$ ]                   | $wR_2 = 0.5631$                                            |
| Final <i>R</i> indexes                    | $R_1 = 0.28830$                                            |
| [all data]                                | $wR_2 = 0.6022$                                            |
| Largest peak/hole [eÅ <sup>-3</sup> ]     | 0.90/-0.80                                                 |
| CCDC number                               | 2468193                                                    |

**imidazole@COF-300:** A pyramidal-shaped crystal of imidazole@COF-300 was coated with silicone oil and mounted on a 0.050 mm diameter loop. The crystal data was measured on the single-crystal X-ray diffractometer. All the non-hydrogen atoms of the framework were refined anisotropically. Hydrogen atoms were included at the geometrically calculated positions and refined using a riding model.

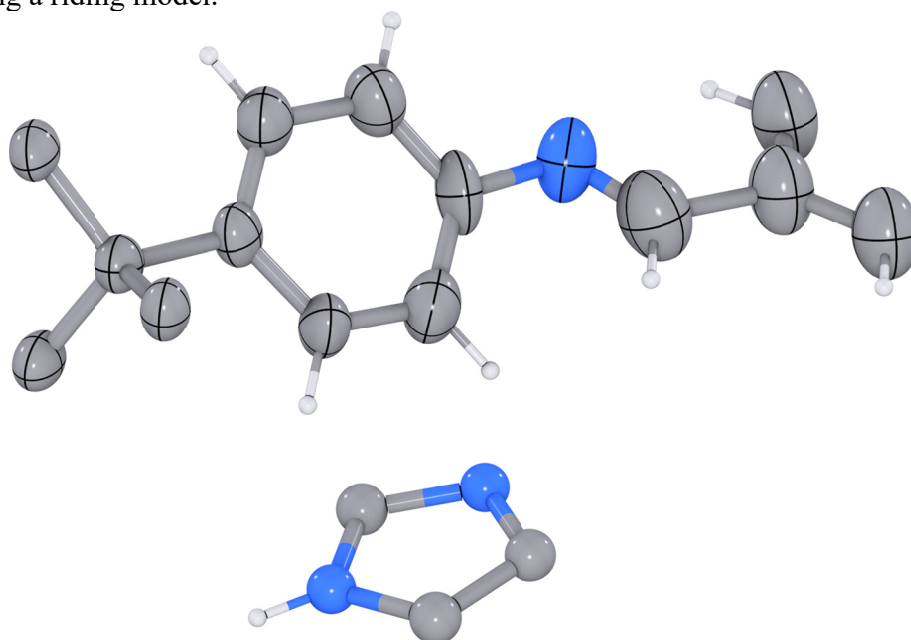

**Supplementary Fig. 38.** Asymmetric unit in the single crystal structure of imidazole@COF-300.

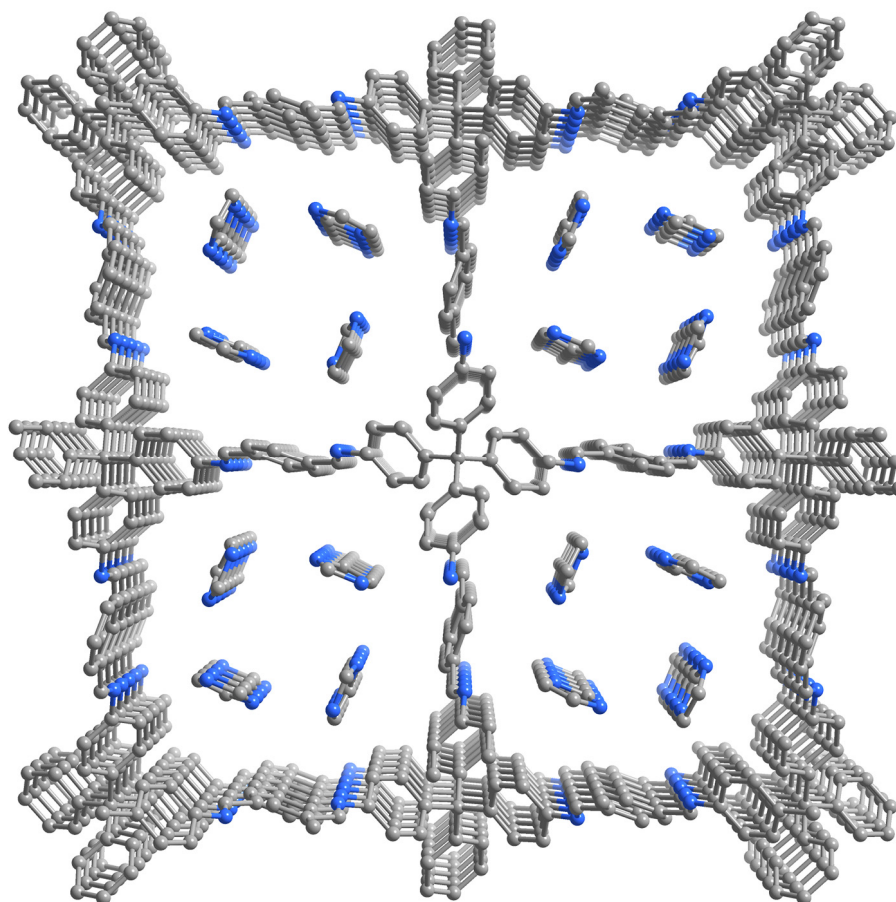

**Supplementary Fig. 39.** Single-crystal structure of imidazole@COF-300 viewed along c-axis. C atoms, gray; N atoms, blue. H atoms were omitted for clarity.

**Supplementary Table 15.** Crystallographic data and structural refinement parameters for imidazole@COF-300.

| Name                                      | imidazole@COF-300                                           |
|-------------------------------------------|-------------------------------------------------------------|
| Empirical formula                         | C <sub>44</sub> H <sub>29</sub> N <sub>6</sub>              |
| Formula weight                            | 641.73                                                      |
| Temperature [K]                           | 173.00                                                      |
| Crystal system                            | tetragonal                                                  |
| Space group (number)                      | <i>I</i> 4 <sub>1</sub> /a                                  |
| <i>a</i> [Å]                              | 26.166(4)                                                   |
| <i>b</i> [Å]                              | 26.166(4)                                                   |
| <i>c</i> [Å]                              | 7.6048(19)                                                  |
| $\alpha$ [°]                              | 90                                                          |
| $\beta$ [°]                               | 90                                                          |
| $\gamma$ [°]                              | 90                                                          |
| Volume [Å <sup>3</sup> ]                  | 5206.6(19)                                                  |
| <i>Z</i>                                  | 4                                                           |
| $\rho_{\text{calc}}$ [gcm <sup>-3</sup> ] | 0.819                                                       |
| $\mu$ [mm <sup>-1</sup> ]                 | 0.385                                                       |
| <i>F</i> (000)                            | 1340.0                                                      |
| Crystal size [mm <sup>3</sup> ]           | 0.2 × 0.15 × 0.13                                           |
| Radiation                                 | CuK $\alpha$ ( $\lambda$ = 1.54178)                         |
| 2 $\theta$ range [°]                      | 9.56 to 96.458                                              |
| Index ranges                              | -25 ≤ <i>h</i> ≤ 24, -25 ≤ <i>k</i> ≤ 25, -6 ≤ <i>l</i> ≤ 7 |
| Reflections collected                     | 10417                                                       |
| Independent reflections                   | 1224                                                        |
|                                           | $R_{\text{int}} = 0.0648$ , $R_{\text{sigma}} = 0.0352$     |
| Data / Restraints / Parameters            | 1224/119/140                                                |
| Goodness-of-fit on $F^2$                  | 0.998                                                       |
| Final <i>R</i> indexes                    | $R_1 = 0.1653$                                              |
| [ $I \geq 2\sigma(I)$ ]                   | $wR_2 = 0.3934$                                             |
| Final <i>R</i> indexes                    | $R_1 = 0.1854$                                              |
| [all data]                                | $wR_2 = 0.4124$                                             |
| Largest peak/hole [eÅ <sup>-3</sup> ]     | 0.38/-0.28                                                  |
| CCDC number                               | 2468194                                                     |

**2-methylimidazole@COF-300:** A pyramidal-shaped crystal of 2-methylimidazole@COF-300 was coated with silicone oil and mounted on a 0.050 mm diameter loop. The crystal data was measured on the single-crystal X-ray diffractometer. All the non-hydrogen atoms of the framework were refined anisotropically. Hydrogen atoms were included at the geometrically calculated positions and refined using a riding model.

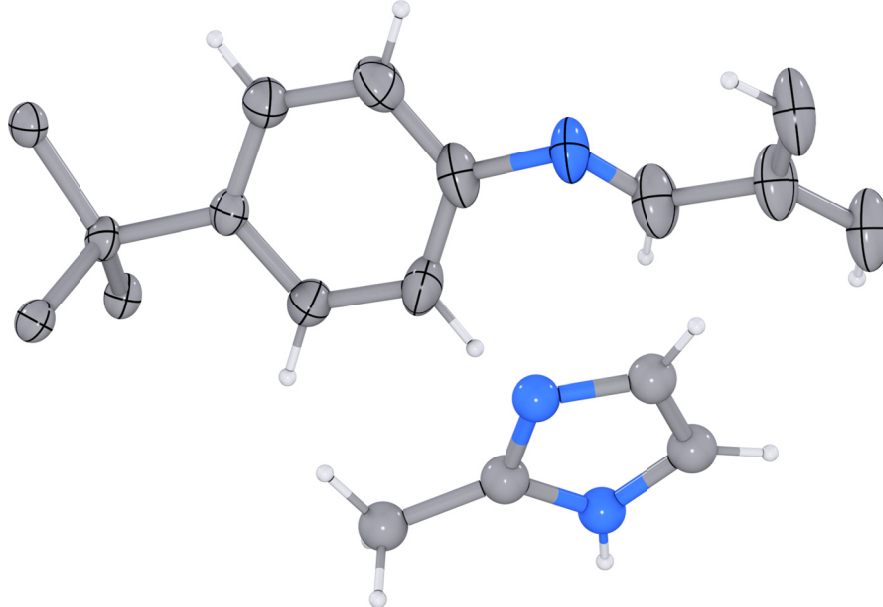

**Supplementary Fig. 32.** Asymmetric unit in the single crystal structure of 2-methylimidazole@COF-300.



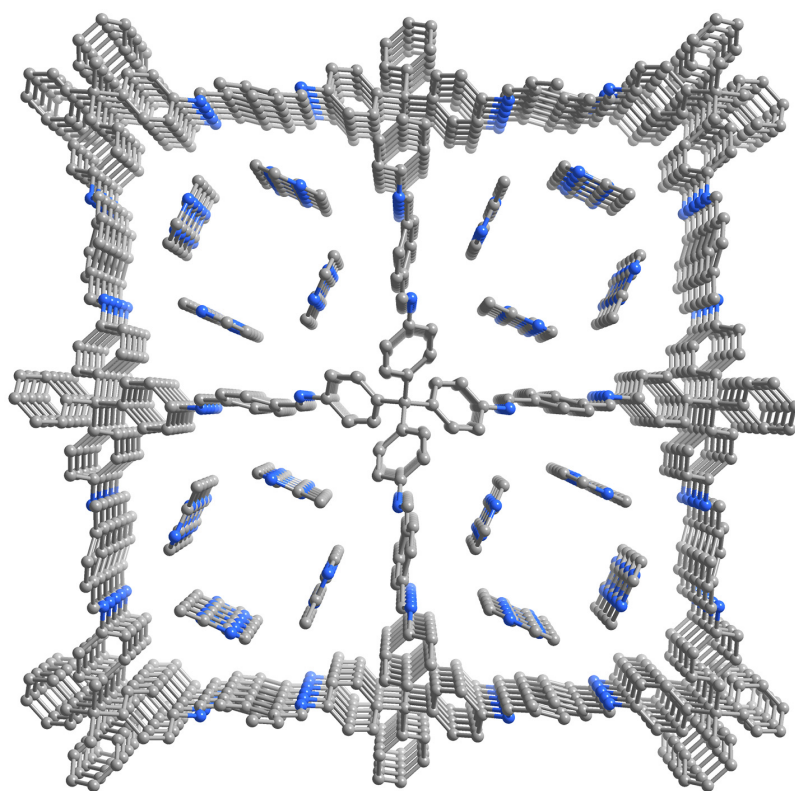

**Supplementary Fig. 33.** Single-crystal structure of 2-methylimidazole@COF-300 viewed along c-axis. C atoms, gray; N atoms, blue. H atoms were omitted for clarity.

**Supplementary Table 12.** Crystallographic data and structural refinement parameters for 2-methylimidazole@COF-300.

| Name                                      | 2-methylimidazole@COF-300                                   |
|-------------------------------------------|-------------------------------------------------------------|
| Empirical formula                         | C <sub>45</sub> H <sub>34</sub> N <sub>6</sub>              |
| Formula weight                            | 658.78                                                      |
| Temperature [K]                           | 293.00                                                      |
| Crystal system                            | tetragonal                                                  |
| Space group (number)                      | <i>I</i> 4 <sub>1</sub> /a                                  |
| <i>a</i> [Å]                              | 27.2075(11)                                                 |
| <i>b</i> [Å]                              | 27.2075(11)                                                 |
| <i>c</i> [Å]                              | 7.3528(5)                                                   |
| $\alpha$ [°]                              | 90                                                          |
| $\beta$ [°]                               | 90                                                          |
| $\gamma$ [°]                              | 90                                                          |
| Volume [Å <sup>3</sup> ]                  | 5442.9 (6)                                                  |
| <i>Z</i>                                  | 4                                                           |
| $\rho_{\text{calc}}$ [gcm <sup>-3</sup> ] | 0.804                                                       |
| $\mu$ [mm <sup>-1</sup> ]                 | 0.375                                                       |
| <i>F</i> (000)                            | 1384.0                                                      |
| Crystal size [mm <sup>3</sup> ]           | 0.15 × 0.15 × 0.1                                           |
| Radiation                                 | CuK $\alpha$ ( $\lambda$ = 1.54178)                         |
| 2 $\theta$ range [°]                      | 12.47 to 127.656                                            |
| Index ranges                              | -22 ≤ <i>h</i> ≤ 31, -26 ≤ <i>k</i> ≤ 31, -7 ≤ <i>l</i> ≤ 7 |
| Reflections collected                     | 13809                                                       |
| Independent reflections                   | 2110                                                        |
|                                           | $R_{\text{int}} = 0.0571$ , $R_{\text{sigma}} = 0.0389$     |
| Data / Restraints / Parameters            | 2110/82/148                                                 |
| Goodness-of-fit on $F^2$                  | 1.013                                                       |
| Final <i>R</i> indexes                    | $R_1 = 0.1518$                                              |
| [ $I \geq 2\sigma(I)$ ]                   | $wR_2 = 0.3825$                                             |
| Final <i>R</i> indexes                    | $R_1 = 0.1826$                                              |
| [all data]                                | $wR_2 = 0.4121$                                             |
| Largest peak/hole [eÅ <sup>-3</sup> ]     | 0.51/-0.30                                                  |
| CCDC number                               | 2498195                                                     |

**2-ethylimidazole@COF-300:** A pyramidal-shaped crystal of 2-ethylimidazole@COF-300 was coated with silicone oil and mounted on a 0.050 mm diameter loop. The crystal data was measured on the single-crystal X-ray diffractometer with a resolution of 0.86 Å. All the non-hydrogen atoms of the framework were refined anisotropically. Hydrogen atoms were included at the geometrically calculated positions and refined using a riding model.

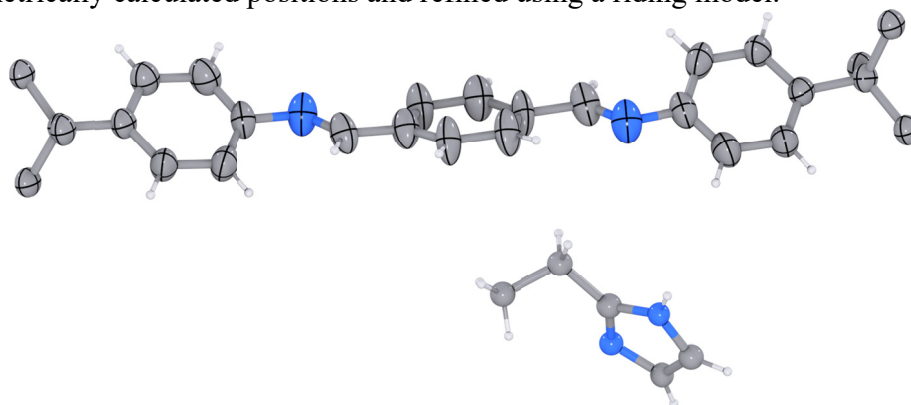

**Supplementary Fig. 30.** Asymmetric unit in the single crystal structure of 2-ethylimidazole@COF-300.

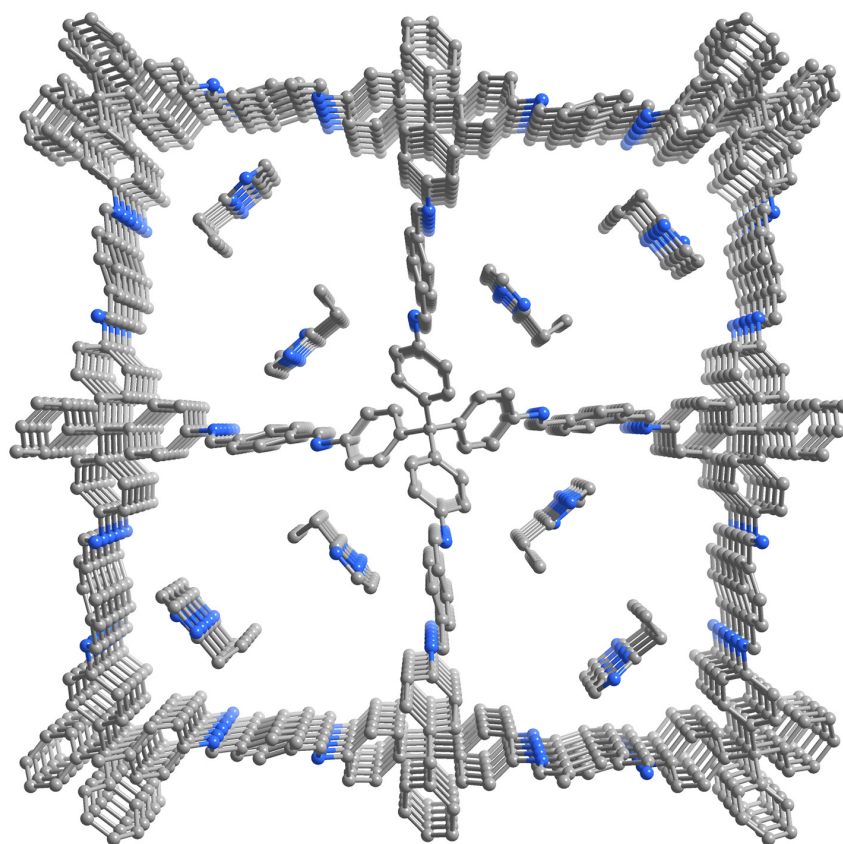

**Supplementary Fig. 31.** Single-crystal structure of 2-ethylimidazole@COF-300 viewed along c-axis. C atoms, gray; N atoms, blue. H atoms were omitted for clarity.

**Supplementary Table 11.** Crystallographic data and structural refinement parameters for 2-ethylimidazole@COF-300.

| Name                                      | 2-ethylimidazole@COF-300                                    |
|-------------------------------------------|-------------------------------------------------------------|
| Empirical formula                         | C <sub>51</sub> H <sub>42</sub> N <sub>8</sub>              |
| Formula weight                            | 766.92                                                      |
| Temperature [K]                           | 293.00                                                      |
| Crystal system                            | tetragonal                                                  |
| Space group (number)                      | <i>I</i> $\bar{4}$                                          |
| <i>a</i> [Å]                              | 26.5843(17)                                                 |
| <i>b</i> [Å]                              | 26.5843(17)                                                 |
| <i>c</i> [Å]                              | 7.4767(8)                                                   |
| $\alpha$ [°]                              | 90                                                          |
| $\beta$ [°]                               | 90                                                          |
| $\gamma$ [°]                              | 90                                                          |
| Volume [Å <sup>3</sup> ]                  | 5284.0(9)                                                   |
| <i>Z</i>                                  | 4                                                           |
| $\rho_{\text{calc}}$ [gcm <sup>-3</sup> ] | 0.964                                                       |
| $\mu$ [mm <sup>-1</sup> ]                 | 0.454                                                       |
| <i>F</i> (000)                            | 1616.0                                                      |
| Crystal size [mm <sup>3</sup> ]           | 0.2 × 0.15 × 0.13                                           |
| Radiation                                 | CuK $\alpha$ ( $\lambda$ = 1.54178)                         |
| 2 $\theta$ range [°]                      | 9.41 to 128.116                                             |
| Index ranges                              | -23 ≤ <i>h</i> ≤ 30, -26 ≤ <i>k</i> ≤ 22, -7 ≤ <i>l</i> ≤ 8 |
| Reflections collected                     | 12929                                                       |
| Independent reflections                   | 4240                                                        |
|                                           | $R_{\text{int}} = 0.0705$ , $R_{\text{sigma}} = 0.0805$     |
| Data / Restraints / Parameters            | 4240/191/259                                                |
| Goodness-of-fit on $F^2$                  | 1.205                                                       |
| Final <i>R</i> indexes                    | $R_1 = 0.1229$                                              |
| [ $I \geq 2\sigma(I)$ ]                   | $wR_2 = 0.3108$                                             |
| Final <i>R</i> indexes                    | $R_1 = 0.1694$                                              |
| [all data]                                | $wR_2 = 0.3477$                                             |
| Largest peak/hole [eÅ <sup>-3</sup> ]     | 0.42/-0.31                                                  |
| Flack parameter                           | 2(3)                                                        |
| CCDC number                               | 2468196                                                     |

**benzimidazole@COF-300:** A pyramidal-shaped crystal of benzimidazole@COF-300 was coated with silicone oil and mounted on a 0.050 mm diameter loop. The crystal data was measured on the single-crystal X-ray diffractometer with a resolution of 0.98 Å. All the non-hydrogen atoms of the framework were refined anisotropically. Hydrogen atoms were included at the geometrically calculated positions and refined using a riding model.

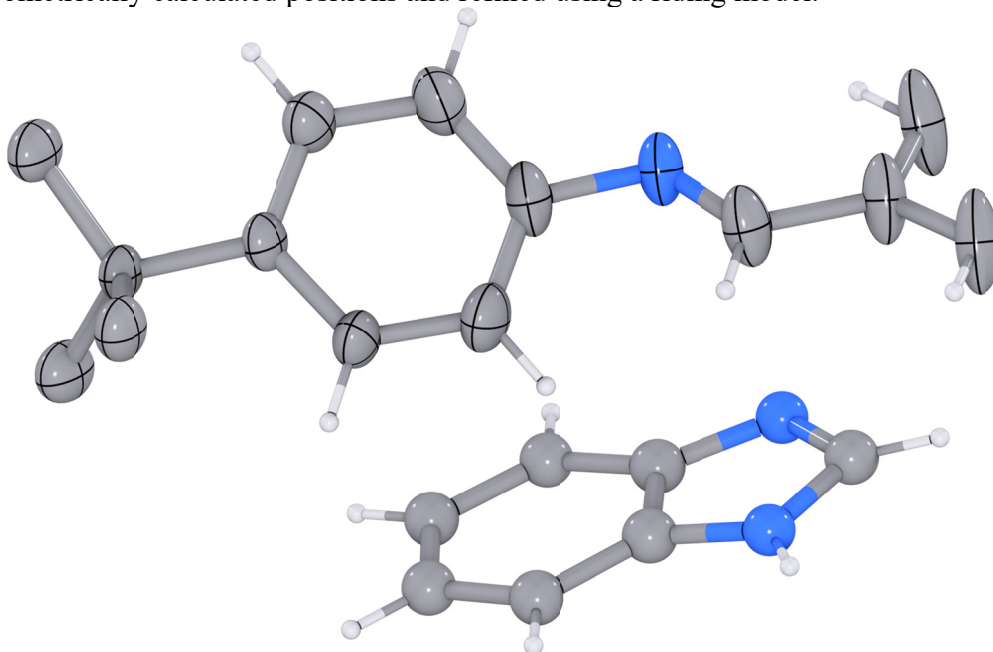

**Supplementary Fig. 34.** Asymmetric unit in the single crystal structure of benzimidazole@COF-300.

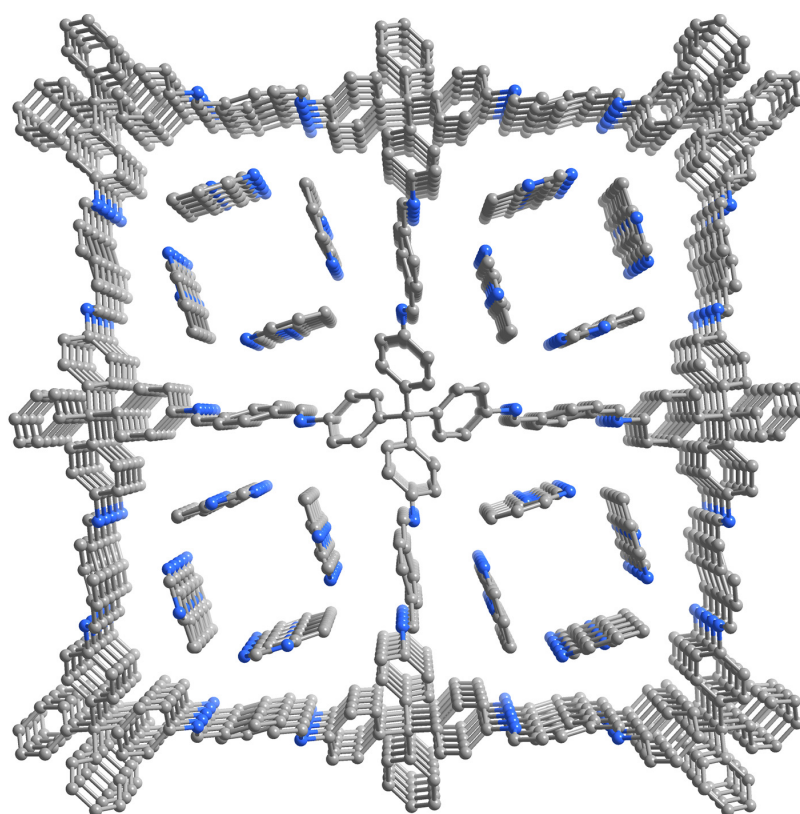

**Supplementary Fig. 35.** Single-crystal structure of benzimidazole@COF-300 viewed along c-axis. C atoms, gray; N atoms, blue. H atoms were omitted for clarity.

**Supplementary Table 13.** Crystallographic data and structural refinement parameters for benzimidazole@COF-300.

| Name                                      | benzimidazole@COF-300                                       |
|-------------------------------------------|-------------------------------------------------------------|
| Empirical formula                         | C <sub>69</sub> H <sub>52</sub> N <sub>12</sub>             |
| Formula weight                            | 1049.22                                                     |
| Temperature [K]                           | 173.00                                                      |
| Crystal system                            | tetragonal                                                  |
| Space group (number)                      | <i>I</i> 4 <sub>1</sub> /a                                  |
| <i>a</i> [Å]                              | 27.031(5)                                                   |
| <i>b</i> [Å]                              | 27.031(5)                                                   |
| <i>c</i> [Å]                              | 7.394(2)                                                    |
| $\alpha$ [°]                              | 90                                                          |
| $\beta$ [°]                               | 90                                                          |
| $\gamma$ [°]                              | 90                                                          |
| Volume [Å <sup>3</sup> ]                  | 5402(3)                                                     |
| <i>Z</i>                                  | 4                                                           |
| $\rho_{\text{calc}}$ [gcm <sup>-3</sup> ] | 1.290                                                       |
| $\mu$ [mm <sup>-1</sup> ]                 | 0.616                                                       |
| <i>F</i> (000)                            | 2200.0                                                      |
| Crystal size [mm <sup>3</sup> ]           | 0.15 × 0.15 × 0.1                                           |
| Radiation                                 | CuK $\alpha$ ( $\lambda$ = 1.54178)                         |
| 2 $\theta$ range [°]                      | 9.254 to 104.424                                            |
| Index ranges                              | -23 ≤ <i>h</i> ≤ 26, -27 ≤ <i>k</i> ≤ 27, -7 ≤ <i>l</i> ≤ 7 |
| Reflections collected                     | 10614                                                       |
| Independent reflections                   | 1501                                                        |
|                                           | $R_{\text{int}} = 0.0572$ , $R_{\text{sigma}} = 0.0337$     |
| Data / Restraints / Parameters            | 1501/261/175                                                |
| Goodness-of-fit on $F^2$                  | 1.071                                                       |
| Final <i>R</i> indexes                    | $R_1 = 0.1172$                                              |
| [ $I \geq 2\sigma(I)$ ]                   | $wR_2 = 0.3386$                                             |
| Final <i>R</i> indexes                    | $R_1 = 0.1295$                                              |
| [all data]                                | $wR_2 = 0.3523$                                             |
| Largest peak/hole [eÅ <sup>-3</sup> ]     | 0.24/-0.20                                                  |
| CCDC number                               | 2468197                                                     |



**benzotriazole@COF-300:** A pyramidal-shaped crystal of benzotriazole@COF-300 was coated with silicone oil and mounted on a 0.050 mm diameter loop. The crystal data was measured on the single-crystal X-ray diffractometer with a resolution of 1.04 Å. All the non-hydrogen atoms of the framework were refined anisotropically. Hydrogen atoms were included at the geometrically calculated positions and refined using a riding model.

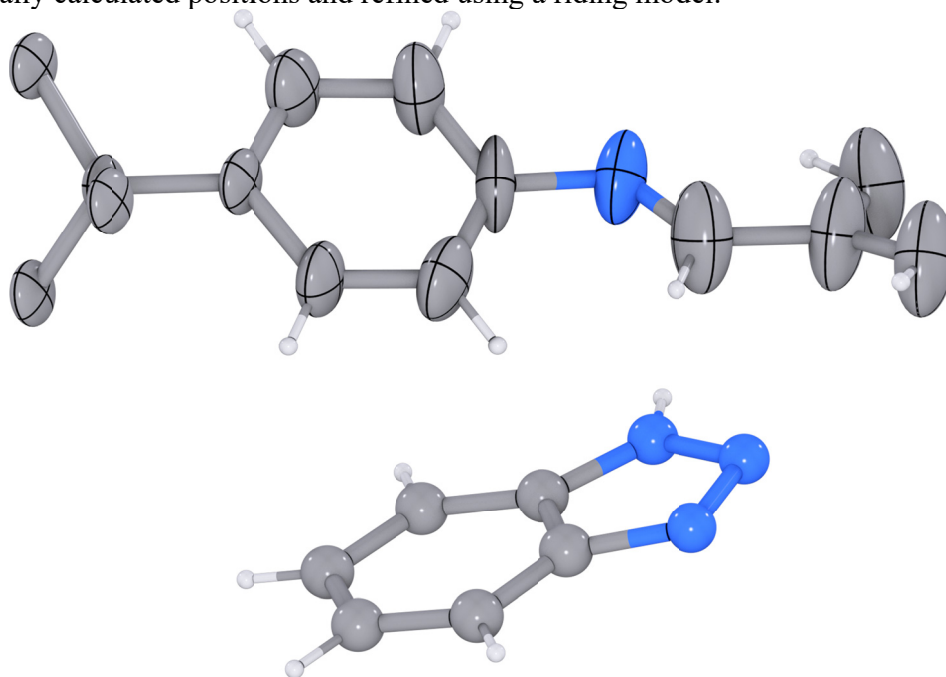

**Supplementary Fig. 36.** Asymmetric unit in the single crystal structure of benzotriazole@COF-300.

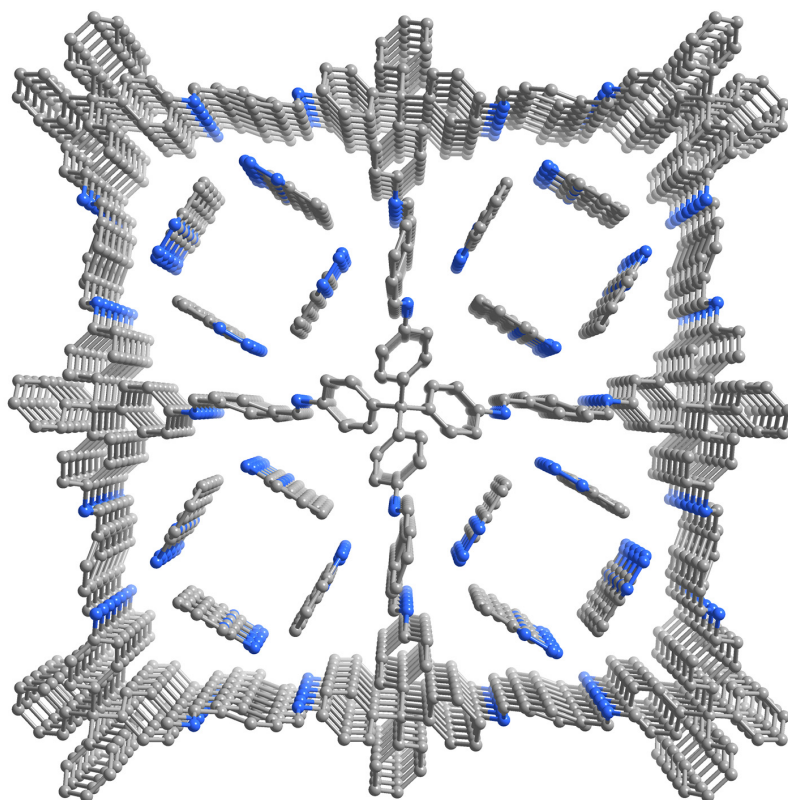

**Supplementary Fig. 37.** Single-crystal structure of benzotriazole@COF-300 viewed along c-axis. C atoms, gray; N atoms, blue. H atoms were omitted for clarity.

**Supplementary Table 14.** Crystallographic data and structural refinement parameters for benzotriazole@COF-300.

| Name                                      | benzotriazole@COF-300                                                |
|-------------------------------------------|----------------------------------------------------------------------|
| Empirical formula                         | C <sub>65</sub> H <sub>48</sub> N <sub>16</sub>                      |
| Formula weight                            | 1053.19                                                              |
| Temperature [K]                           | 173.00                                                               |
| Crystal system                            | tetragonal                                                           |
| Space group (number)                      | <i>I</i> 4 <sub>1</sub> /a                                           |
| <i>a</i> [Å]                              | 26.659(2)                                                            |
| <i>b</i> [Å]                              | 26.659(2)                                                            |
| <i>c</i> [Å]                              | 7.4645(8)                                                            |
| $\alpha$ [°]                              | 90                                                                   |
| $\beta$ [°]                               | 90                                                                   |
| $\gamma$ [°]                              | 90                                                                   |
| Volume [Å <sup>3</sup> ]                  | 5304.9(10)                                                           |
| <i>Z</i>                                  | 4                                                                    |
| $\rho_{\text{calc}}$ [gcm <sup>-3</sup> ] | 1.319                                                                |
| $\mu$ [mm <sup>-1</sup> ]                 | 0.652                                                                |
| <i>F</i> (000)                            | 2200.0                                                               |
| Crystal size [mm <sup>3</sup> ]           | 0.15 × 0.15 × 0.1                                                    |
| Radiation                                 | CuK $\alpha$ ( $\lambda$ = 1.54178)                                  |
| 2 $\theta$ range [°]                      | 12.314 to 95.58                                                      |
| Index ranges                              | -20 ≤ <i>h</i> ≤ 25, -19 ≤ <i>k</i> ≤ 25, -7 ≤ <i>l</i> ≤ 6          |
| Reflections collected                     | 7601                                                                 |
| Independent reflections                   | 1220                                                                 |
|                                           | <i>R</i> <sub>int</sub> = 0.0784, <i>R</i> <sub>sigma</sub> = 0.0512 |
| Data / Restraints / Parameters            | 1220/99/176                                                          |
| Goodness-of-fit on <i>F</i> <sup>2</sup>  | 1.069                                                                |
| Final <i>R</i> indexes                    | <i>R</i> <sub>1</sub> = 0.1510                                       |
| [ <i>I</i> ≥ 2σ( <i>I</i> )]              | w <i>R</i> <sub>2</sub> = 0.3837                                     |
| Final <i>R</i> indexes                    | <i>R</i> <sub>1</sub> = 0.1765                                       |
| [all data]                                | w <i>R</i> <sub>2</sub> = 0.4085                                     |
| Largest peak/hole [eÅ <sup>-3</sup> ]     | 0.26/-0.25                                                           |
| CCDC number                               | 2468198                                                              |

## References

1. Dolbecq A, *et al.* Synthesis, X-ray and Neutron Diffraction Characterization, and Ionic Conduction Properties of a New Oxothiomolybdate  $\text{Li}_3[\text{Mo}_8\text{S}_8\text{O}_8(\text{OH})_8\{\text{HWO}_5(\text{H}_2\text{O})\}]\cdot 18\text{H}_2\text{O}$ . *Chemistry-A European Journal* **8**, 349–356 (2002).
2. Misawa T, *et al.* Conductive hybrid crystal composed of polyoxovanadate and deprotonatable ionic-liquid surfactant. *Inorganic Chemistry Communications* **96**, 24–29 (2018).
3. Yu B, *et al.* Linkage conversions in single-crystalline covalent organic frameworks. *Nature Chemistry* **16**, 114–121 (2023).
4. Tang Q, *et al.* High Proton Conduction at above 100 °C Mediated by Hydrogen Bonding in a Lanthanide Metal–Organic Framework. *Journal of the American Chemical Society* **136**, 12444–12449 (2014).
5. Chen W-X, *et al.* Temperature-dependent conductivity of Emim<sup>+</sup> (Emim<sup>+</sup> = 1-ethyl-3-methyl imidazolium) confined in channels of a metal–organic framework. *Chemical Communications* **47**, 11933–11935 (2011).
6. Wei Y-S, *et al.* Unique Proton Dynamics in an Efficient MOF-Based Proton Conductor. *Journal of the American Chemical Society* **139**, 3505–3512 (2017).
7. Umeyama D, Horike S, Inukai M, Itakura T, Kitagawa S. Inherent Proton Conduction in a 2D Coordination Framework. *Journal of the American Chemical Society* **134**, 12780–12785 (2012).
8. Tominaka S, Cheetham AK. Intrinsic and extrinsic proton conductivity in metal-organic frameworks. *RSC Adv.* **4**, 54382–54387 (2014).
9. Sunairi Y, Ueda A, Yoshida J, Suzuki K, Mori H. Anisotropic Proton Conductivity Arising from Hydrogen-Bond Patterns in Anhydrous Organic Single Crystals, Imidazolium Carboxylates. *The Journal of Physical Chemistry C* **122**, 11623–11632 (2018).
10. Ma Z, *et al.* Synthesis, crystal structure and possible proton conduction of  $\text{Fe}(\text{H}_2\text{PO}_4)_2\cdot\text{F}$ . *Solid State Ionics* **338**, 134–137 (2019).
11. Bagryantseva IN, Ponomareva VG. Ponomareva, Proton Conductivity and Thermal Properties of  $\text{Ba}(\text{H}_2\text{PO}_4)_2$ . *Inorganic Materials* **54**, 366–373 (2018).
